# Supplementary material for: Comprehensive Functional Annotation of Seventy-One Breast Cancer Risk Loci
Source: PLoS One. 2013 May 22;8(5):e63925. doi: 10.1371/journal.pone.0063925 (PMC3661550; doi:10.1371/journal.pone.0063925)
Supplement: Table S2 — Protein function prediction results for missense variants of high LD SNPs. (XLS) [file pone.0063925.s008.xls]

## Sheet: sheet1
Table S2. Protein function prediction results for missense variants of high LD SNPs.
A. PolyPhen						using WHESS
ChrPos	Ref/Allele	Gene	Transcript	Strand	Observed	RefSNP	Protein	Pos	AA1/AA2	HDivPred	HDivProb	HVarPred	HVarProb	Details
chr1:202183308	C / T	LGR6	uc001gxw.2	+	C / T	rs10920362	Q9HBX8-1	9	S / L	benign	0.003	benign	0.001	View
chr5:44809162	G / C	MRPS30	uc003joh.2	+	G / C	rs3747479	Q9NP92	33	C / S	benign	0	benign	0.002	View
chr5:44809162	G / T	MRPS30	uc003joh.2	+	G / T	rs3747479	Q9NP92	33	C / F	benign	0	benign	0.003	View
chr6:151936677	G / A	C6orf97	uc003qol.2	+	G / A	rs6929137	Q8IYT3	604	V / I	benign	0.026	benign	0.015	View
chr17:53076799	G / A	STXBP4	uc010dcd.1	+	G / A	rs1156287	E7EPP7	92	G / R	benign	0	benign	0	View
chr17:53076799	G / A	STXBP4	uc002iuf.1	+	G / A	rs1156287	Q6ZWJ1	92	G / R	benign	0	benign	0	View
chr17:53076799	G / A	STXBP4	uc010dcc.1	+	G / A	rs1156287	Q6ZWJ1-2	15	G / R	benign	0	benign	0	View
chr19:17392894	G / A	ANKLE1	uc010xpn.1	+	G / A	rs8100241	E7ETZ9	31	A / T	possibly damaging	0.634	benign	0.302	View
chr19:17392894	G / A	ANKLE1	uc002nga.2	+	G / A	rs8100241	Q8NAG6	31	A / T	probably damaging	0.998	possibly damaging	0.884	View
chr19:17392894	G / A	ANKLE1	uc010eao.1	+	G / A	rs8100241	Q8NAG6-1	17	A / T	probably damaging	1	probably damaging	0.998	View
chr19:17393530	T / A	ANKLE1	uc010xpn.1	+	T / A	rs8108174	E7ETZ9	94	L / Q	possibly damaging	0.793	benign	0.426	View
chr19:17393530	T / A	ANKLE1	uc002nga.2	+	T / A	rs8108174	Q8NAG6	94	L / Q	probably damaging	1	probably damaging	0.999	View
chr19:17393530	T / A	ANKLE1	uc010eao.1	+	T / A	rs8108174	Q8NAG6-1	80	L / Q	probably damaging	1	probably damaging	0.999	View
B. SIFT
SNP	Amino acid change	Protein ID	Amino acid	Prediction (Orthologs)	Score (Orthologs)	Median info (Orthologs)	Prediction (Homologs)	Score (Homologs)	Median info (Homologs)
rs10920362	S9L	NP_001017404	S	TOLERATED	0.86	2.61	TOLERATED	0.67	4.32
			L	TOLERATED	0.59	2.61	TOLERATED	0.24	4.32
rs3747479	C33F	NP_057724	C	TOLERATED	0.09	2.17	TOLERATED	0.15	2.26
			F	TOLERATED	0.06	2.17	TOLERATED	0.14	2.26
rs3747479	C33S	NP_057724	C	TOLERATED	0.09	2.17	TOLERATED	0.15	2.26
			S	TOLERATED	0.74	2.17	TOLERATED	0.78	2.26
rs6929137	V604I	NP_079335	V	TOLERATED	0.42	1.3	TOLERATED	0.36	1.9
			I	TOLERATED	0.22	1.3	TOLERATED	0.15	1.9
rs1156287	G92R	NP_848604	G	TOLERATED	0.31	2.1	DAMAGING	0.02	2.49
			R	TOLERATED	1	2.1	TOLERATED	1	2.49
rs8100241	A31T	NP_689576	A	TOLERATED	1	1.89	TOLERATED	1	2.17
			T	TOLERATED	0.05	1.89	TOLERATED	0.11	2.17
rs8108174	L94Q	NP_689576	L	TOLERATED	1	1.85	TOLERATED	1	2.09
			Q	DAMAGING	0.02	1.85	DAMAGING	0.05	2.09
C. dbNSFP Nonsynonymous functional predictions
genome	chromosome	input_feature_start	input_feature_end	feature_start	feature_end	strand	hgnc	ngs_ontology_no	ID	feature	entrez	pmid	uniprot	ensembl	user_chromosome	user_start	user_stop	ID	dbNSFP_Ancestral_allele	dbNSFP_CCDSid	dbNSFP_Consensus_Prediction	dbNSFP_GERP_NR	dbNSFP_GERP_RS	dbNSFP_LRT_pred	dbNSFP_LRT_score	dbNSFP_MutTaster_pred	dbNSFP_MutTaster_score	dbNSFP_PhyloP_pred	dbNSFP_PhyloP_score	dbNSFP_Polyphen2_pred	dbNSFP_Polyphen2_score	dbNSFP_SIFT_pred	dbNSFP_SIFT_score	dbNSFP_Variant	dbNSFP_aa_altref	dbNSFP_aa_pos	dbNSFP_aa_ref	dbNSFP_altref	dbNSFP_ref	ensembl	entrez	feature	uniprot	input_id	description	ngs_feature_no
hg19	11	65667796	65667797	65667797	65667797	-	FOSL1	26	8061	F>Y:Unknown 25%	8061	N/A	P15407	ENSG00000175592	chr11	65667796	65667797	8061	A	CCDS8121.1	Unknown 25%	3.72	2.61	N	0.996148	N	0.024711	N	0.874695	P	0.187	T	0	F>Y	Y	5	F	T	A	ENSG00000175592	8061	F>Y:Unknown 25%	P15407	2	ID|8061;dbNSFP_Ancestral_allele|A;dbNSFP_CCDSid|CCDS8121.1;dbNSFP_GERP_NR|3.72;dbNSFP_GERP_RS|2.61;dbNSFP_LRT_pred|N;dbNSFP_LRT_score|0.996148;dbNSFP_MutTaster_pred|N;dbNSFP_MutTaster_score|0.024711;dbNSFP_PhyloP_pred|N;dbNSFP_PhyloP_score|0.874695;dbNSFP_Polyphen2_pred|P;dbNSFP_Polyphen2_score|0.187;dbNSFP_SIFT_pred|T;dbNSFP_SIFT_score|0.0;dbNSFP_aa_altref|Y;dbNSFP_aa_pos|5;dbNSFP_aa_ref|F;dbNSF…	25923237
hg19	11	65667796	65667797	65667797	65667797	-	FOSL1	26	8061	F>S:Unknown 25%	8061	N/A	P15407	ENSG00000175592	chr11	65667796	65667797	8061	A	CCDS8121.1	Unknown 25%	3.72	2.61	N	0.996148	N	0.0838	N	0.874695	P	0.679	T	0.78	F>S	S	5	F	G	A	ENSG00000175592	8061	F>S:Unknown 25%	P15407	2	ID|8061;dbNSFP_Ancestral_allele|A;dbNSFP_CCDSid|CCDS8121.1;dbNSFP_GERP_NR|3.72;dbNSFP_GERP_RS|2.61;dbNSFP_LRT_pred|N;dbNSFP_LRT_score|0.996148;dbNSFP_MutTaster_pred|N;dbNSFP_MutTaster_score|0.0838;dbNSFP_PhyloP_pred|N;dbNSFP_PhyloP_score|0.874695;dbNSFP_Polyphen2_pred|P;dbNSFP_Polyphen2_score|0.679;dbNSFP_SIFT_pred|T;dbNSFP_SIFT_score|0.78;dbNSFP_aa_altref|S;dbNSFP_aa_pos|5;dbNSFP_aa_ref|F;dbNSFP…	25923239
hg19	11	65667796	65667797	65667797	65667797	-	FOSL1	26	8061	F>C:Probably deleterious 25%	8061	N/A	P15407	ENSG00000175592	chr11	65667796	65667797	8061	A	CCDS8121.1	Probably deleterious 25%	3.72	2.61	N	0.996148	N	0.249036	N	0.874695	P	0.679	D	0.99	F>C	C	5	F	C	A	ENSG00000175592	8061	F>C:Probably deleterious 25%	P15407	2	ID|8061;dbNSFP_Ancestral_allele|A;dbNSFP_CCDSid|CCDS8121.1;dbNSFP_GERP_NR|3.72;dbNSFP_GERP_RS|2.61;dbNSFP_LRT_pred|N;dbNSFP_LRT_score|0.996148;dbNSFP_MutTaster_pred|N;dbNSFP_MutTaster_score|0.249036;dbNSFP_PhyloP_pred|N;dbNSFP_PhyloP_score|0.874695;dbNSFP_Polyphen2_pred|P;dbNSFP_Polyphen2_score|0.679;dbNSFP_SIFT_pred|D;dbNSFP_SIFT_score|0.99;dbNSFP_aa_altref|C;dbNSFP_aa_pos|5;dbNSFP_aa_ref|F;dbNS…	25923241
hg19	17	53076799	53076800	53076799	53076799	+	STXBP4	26	252983	G>R:Harmless 100%	252983	N/A	Q6ZWJ1	ENSG00000166263	chr17	53076799	53076800	252983	A	CCDS11584.2	Harmless 100%	5.57	2.84	N	0.999984	P	2e-05	N	0.934541	B	0	T	0.02	G>R	R	92	G	A	G	ENSG00000166263	252983	G>R:Harmless 100%	Q6ZWJ1	4	ID|252983;dbNSFP_Ancestral_allele|A;dbNSFP_CCDSid|CCDS11584.2;dbNSFP_GERP_NR|5.57;dbNSFP_GERP_RS|2.84;dbNSFP_LRT_pred|N;dbNSFP_LRT_score|0.999984;dbNSFP_MutTaster_pred|P;dbNSFP_MutTaster_score|2.0E-5;dbNSFP_PhyloP_pred|N;dbNSFP_PhyloP_score|0.934541;dbNSFP_Polyphen2_pred|B;dbNSFP_Polyphen2_score|0.0;dbNSFP_SIFT_pred|T;dbNSFP_SIFT_score|0.02;dbNSFP_aa_altref|R;dbNSFP_aa_pos|92;dbNSFP_aa_ref|G;dbNS…	62296097
hg19	17	53076799	53076800	53076799	53076799	+	STXBP4	26	252983	G>R:Harmless 100%	252983	N/A	Q6ZWJ1	ENSG00000166263	chr17	53076799	53076800	252983	A	CCDS11584.2	Harmless 100%	5.57	2.84	N	0.999984	P	2e-05	N	0.934541	B	0	T	0.02	G>R	R	92	G	C	G	ENSG00000166263	252983	G>R:Harmless 100%	Q6ZWJ1	4	ID|252983;dbNSFP_Ancestral_allele|A;dbNSFP_CCDSid|CCDS11584.2;dbNSFP_GERP_NR|5.57;dbNSFP_GERP_RS|2.84;dbNSFP_LRT_pred|N;dbNSFP_LRT_score|0.999984;dbNSFP_MutTaster_pred|P;dbNSFP_MutTaster_score|2.0E-5;dbNSFP_PhyloP_pred|N;dbNSFP_PhyloP_score|0.934541;dbNSFP_Polyphen2_pred|B;dbNSFP_Polyphen2_score|0.0;dbNSFP_SIFT_pred|T;dbNSFP_SIFT_score|0.02;dbNSFP_aa_altref|R;dbNSFP_aa_pos|92;dbNSFP_aa_ref|G;dbNS…	62296099
hg19	17	53076799	53076800	53076799	53076799	+	STXBP4	26	252983	G>X:Probably deleterious 25%	252983	N/A	Q6ZWJ1	ENSG00000166263	chr17	53076799	53076800	252983	A	CCDS11584.2	Probably deleterious 25%	5.57	2.84	D	0.999984	P	1	N	0.934541	NA	0.724791	NA	0.898639	G>X	X	92	G	T	G	ENSG00000166263	252983	G>X:Probably deleterious 25%	Q6ZWJ1	4	ID|252983;dbNSFP_Ancestral_allele|A;dbNSFP_CCDSid|CCDS11584.2;dbNSFP_GERP_NR|5.57;dbNSFP_GERP_RS|2.84;dbNSFP_LRT_pred|D;dbNSFP_LRT_score|0.999984;dbNSFP_MutTaster_pred|P;dbNSFP_MutTaster_score|1.0;dbNSFP_PhyloP_pred|N;dbNSFP_PhyloP_score|0.934541;dbNSFP_Polyphen2_pred|NA;dbNSFP_Polyphen2_score|0.724791;dbNSFP_SIFT_pred|NA;dbNSFP_SIFT_score|0.898639;dbNSFP_aa_altref|X;dbNSFP_aa_pos|92;dbNSFP_aa_re…	62296101
hg19	8	76465360	76465361	76465360	76465360	+	HNF4G	26	3174	K>N:Probably deleterious 50%	3174	N/A	Q14541	ENSG00000164749	chr8	76465360	76465361	3174	A	CCDS6220.2	Probably deleterious 50%	4.97	-4.67	D	0.999999	P	0.999935	N	0.058475	P	0.696	D	0.96	K>N	N	181	K	C	A	ENSG00000164749	3174	K>N:Probably deleterious 50%	Q14541	10	ID|3174;dbNSFP_Ancestral_allele|A;dbNSFP_CCDSid|CCDS6220.2;dbNSFP_GERP_NR|4.97;dbNSFP_GERP_RS|-4.67;dbNSFP_LRT_pred|D;dbNSFP_LRT_score|0.999999;dbNSFP_MutTaster_pred|P;dbNSFP_MutTaster_score|0.999935;dbNSFP_PhyloP_pred|N;dbNSFP_PhyloP_score|0.058475;dbNSFP_Polyphen2_pred|P;dbNSFP_Polyphen2_score|0.696;dbNSFP_SIFT_pred|D;dbNSFP_SIFT_score|0.96;dbNSFP_aa_altref|N;dbNSFP_aa_pos|181;dbNSFP_aa_ref|K;d…	135320621
hg19	8	76465360	76465361	76465360	76465360	+	HNF4G	26	3174	K>N:Probably deleterious 50%	3174	N/A	Q14541	ENSG00000164749	chr8	76465360	76465361	3174	A	CCDS6220.2	Probably deleterious 50%	4.97	-4.67	D	0.999999	P	0.999941	N	0.058475	P	0.696	D	0.96	K>N	N	181	K	T	A	ENSG00000164749	3174	K>N:Probably deleterious 50%	Q14541	10	ID|3174;dbNSFP_Ancestral_allele|A;dbNSFP_CCDSid|CCDS6220.2;dbNSFP_GERP_NR|4.97;dbNSFP_GERP_RS|-4.67;dbNSFP_LRT_pred|D;dbNSFP_LRT_score|0.999999;dbNSFP_MutTaster_pred|P;dbNSFP_MutTaster_score|0.999941;dbNSFP_PhyloP_pred|N;dbNSFP_PhyloP_score|0.058475;dbNSFP_Polyphen2_pred|P;dbNSFP_Polyphen2_score|0.696;dbNSFP_SIFT_pred|D;dbNSFP_SIFT_score|0.96;dbNSFP_aa_altref|N;dbNSFP_aa_pos|181;dbNSFP_aa_ref|K;d…	135320623
hg19	19	18546678	18546679	18546679	18546679	-	ISYNA1	26	51477	L>Q:Probably deleterious 75%	51477	N/A	Q9NPH2	ENSG00000105655	chr19	18546678	18546679	51477	A	CCDS12379.1	Probably deleterious 75%	3.9	3.9	D	0.999994	D	0.999556	C	0.996207	D	0.999	D	1	L>Q	Q	343	L	T	A	ENSG00000105655	51477	L>Q:Probably deleterious 75%	Q9NPH2	11	ID|51477;dbNSFP_Ancestral_allele|A;dbNSFP_CCDSid|CCDS12379.1;dbNSFP_GERP_NR|3.9;dbNSFP_GERP_RS|3.9;dbNSFP_LRT_pred|D;dbNSFP_LRT_score|0.999994;dbNSFP_MutTaster_pred|D;dbNSFP_MutTaster_score|0.999556;dbNSFP_PhyloP_pred|C;dbNSFP_PhyloP_score|0.996207;dbNSFP_Polyphen2_pred|D;dbNSFP_Polyphen2_score|0.999;dbNSFP_SIFT_pred|D;dbNSFP_SIFT_score|1.0;dbNSFP_aa_altref|Q;dbNSFP_aa_pos|343;dbNSFP_aa_ref|L;dbN…	71448039
hg19	19	18546678	18546679	18546679	18546679	-	ISYNA1	26	51477	L>P:Probably deleterious 75%	51477	N/A	Q9NPH2	ENSG00000105655	chr19	18546678	18546679	51477	A	CCDS12379.1	Probably deleterious 75%	3.9	3.9	D	0.999994	D	0.999201	C	0.996207	D	1	D	1	L>P	P	343	L	G	A	ENSG00000105655	51477	L>P:Probably deleterious 75%	Q9NPH2	11	ID|51477;dbNSFP_Ancestral_allele|A;dbNSFP_CCDSid|CCDS12379.1;dbNSFP_GERP_NR|3.9;dbNSFP_GERP_RS|3.9;dbNSFP_LRT_pred|D;dbNSFP_LRT_score|0.999994;dbNSFP_MutTaster_pred|D;dbNSFP_MutTaster_score|0.999201;dbNSFP_PhyloP_pred|C;dbNSFP_PhyloP_score|0.996207;dbNSFP_Polyphen2_pred|D;dbNSFP_Polyphen2_score|1.0;dbNSFP_SIFT_pred|D;dbNSFP_SIFT_score|1.0;dbNSFP_aa_altref|P;dbNSFP_aa_pos|343;dbNSFP_aa_ref|L;dbNSF…	71448041
hg19	19	18546678	18546679	18546679	18546679	-	ISYNA1	26	51477	L>R:Probably deleterious 75%	51477	N/A	Q9NPH2	ENSG00000105655	chr19	18546678	18546679	51477	A	CCDS12379.1	Probably deleterious 75%	3.9	3.9	D	0.999994	D	0.99971	C	0.996207	D	0.997	D	1	L>R	R	343	L	C	A	ENSG00000105655	51477	L>R:Probably deleterious 75%	Q9NPH2	11	ID|51477;dbNSFP_Ancestral_allele|A;dbNSFP_CCDSid|CCDS12379.1;dbNSFP_GERP_NR|3.9;dbNSFP_GERP_RS|3.9;dbNSFP_LRT_pred|D;dbNSFP_LRT_score|0.999994;dbNSFP_MutTaster_pred|D;dbNSFP_MutTaster_score|0.99971;dbNSFP_PhyloP_pred|C;dbNSFP_PhyloP_score|0.996207;dbNSFP_Polyphen2_pred|D;dbNSFP_Polyphen2_score|0.997;dbNSFP_SIFT_pred|D;dbNSFP_SIFT_score|1.0;dbNSFP_aa_altref|R;dbNSFP_aa_pos|343;dbNSFP_aa_ref|L;dbNS…	71448043
hg19	19	18538742	18538743	18538742	18538742	+	SSBP4	26	170463	R>G:Probably deleterious 50%	170463	N/A	Q9BWG4	ENSG00000130511	chr19	18538742	18538743	170463	C	CCDS12378.1	Probably deleterious 50%	3.32	1.85	U	0.999996	P	0.870841	N	0.938769	D	0.999	D	1	R>G	G	77	R	G	A	ENSG00000130511	170463	R>G:Probably deleterious 50%	Q9BWG4	1	ID|170463;dbNSFP_Ancestral_allele|C;dbNSFP_CCDSid|CCDS12378.1;dbNSFP_GERP_NR|3.32;dbNSFP_GERP_RS|1.85;dbNSFP_LRT_pred|U;dbNSFP_LRT_score|0.999996;dbNSFP_MutTaster_pred|P;dbNSFP_MutTaster_score|0.870841;dbNSFP_PhyloP_pred|N;dbNSFP_PhyloP_score|0.938769;dbNSFP_Polyphen2_pred|D;dbNSFP_Polyphen2_score|0.999;dbNSFP_SIFT_pred|D;dbNSFP_SIFT_score|1.0;dbNSFP_aa_altref|G;dbNSFP_aa_pos|77;dbNSFP_aa_ref|R;d…	71439241
hg19	19	18538742	18538743	18538742	18538742	+	SSBP4	26	170463	R>X:Unknown 25%	170463	N/A	Q9BWG4	ENSG00000130511	chr19	18538742	18538743	170463	C	CCDS12378.1	Unknown 25%	3.32	1.85	U	0.999996	P	1	N	0.938769	NA	0.725489	NA	0.898977	R>X	X	77	R	T	A	ENSG00000130511	170463	R>X:Unknown 25%	Q9BWG4	1	ID|170463;dbNSFP_Ancestral_allele|C;dbNSFP_CCDSid|CCDS12378.1;dbNSFP_GERP_NR|3.32;dbNSFP_GERP_RS|1.85;dbNSFP_LRT_pred|U;dbNSFP_LRT_score|0.999996;dbNSFP_MutTaster_pred|P;dbNSFP_MutTaster_score|1.0;dbNSFP_PhyloP_pred|N;dbNSFP_PhyloP_score|0.938769;dbNSFP_Polyphen2_pred|NA;dbNSFP_Polyphen2_score|0.725489;dbNSFP_SIFT_pred|NA;dbNSFP_SIFT_score|0.898977;dbNSFP_aa_altref|X;dbNSFP_aa_pos|77;dbNSFP_aa_re…	71439243
hg19	19	18538742	18538743	18538742	18538742	+	SSBP4	26	170463	R>G:Probably deleterious 50%	170463	N/A	Q9BWG4	ENSG00000130511	chr19	18538742	18538743	170463	C	CCDS32960.1	Probably deleterious 50%	3.32	1.85	U	0.999996	P	0.870841	N	0.938769	D	0.999	D	1	R>G	G	77	R	G	A	ENSG00000130511	170463	R>G:Probably deleterious 50%	Q9BWG4	1	ID|170463;dbNSFP_Ancestral_allele|C;dbNSFP_CCDSid|CCDS32960.1;dbNSFP_GERP_NR|3.32;dbNSFP_GERP_RS|1.85;dbNSFP_LRT_pred|U;dbNSFP_LRT_score|0.999996;dbNSFP_MutTaster_pred|P;dbNSFP_MutTaster_score|0.870841;dbNSFP_PhyloP_pred|N;dbNSFP_PhyloP_score|0.938769;dbNSFP_Polyphen2_pred|D;dbNSFP_Polyphen2_score|0.999;dbNSFP_SIFT_pred|D;dbNSFP_SIFT_score|1.0;dbNSFP_aa_altref|G;dbNSFP_aa_pos|77;dbNSFP_aa_ref|R;d…	75845113
hg19	19	18538742	18538743	18538742	18538742	+	SSBP4	26	170463	R>X:Unknown 25%	170463	N/A	Q9BWG4	ENSG00000130511	chr19	18538742	18538743	170463	C	CCDS32960.1	Unknown 25%	3.32	1.85	U	0.999996	P	1	N	0.938769	NA	0.725489	NA	0.898977	R>X	X	77	R	T	A	ENSG00000130511	170463	R>X:Unknown 25%	Q9BWG4	1	ID|170463;dbNSFP_Ancestral_allele|C;dbNSFP_CCDSid|CCDS32960.1;dbNSFP_GERP_NR|3.32;dbNSFP_GERP_RS|1.85;dbNSFP_LRT_pred|U;dbNSFP_LRT_score|0.999996;dbNSFP_MutTaster_pred|P;dbNSFP_MutTaster_score|1.0;dbNSFP_PhyloP_pred|N;dbNSFP_PhyloP_score|0.938769;dbNSFP_Polyphen2_pred|NA;dbNSFP_Polyphen2_score|0.725489;dbNSFP_SIFT_pred|NA;dbNSFP_SIFT_score|0.898977;dbNSFP_aa_altref|X;dbNSFP_aa_pos|77;dbNSFP_aa_re…	75845115
hg19	1	10596341	10596342	10596341	10596341	+	PEX14	26	5195	F>L:Probably deleterious 75%	5195	N/A	O75381	ENSG00000142655	chr1	10596341	10596342	5195	C	CCDS30582.1	Probably deleterious 75%	5.29	2.72	D	1	P	0.99986	C	0.981551	D	0.999	D	1	F>L	L	52	F	A	C	ENSG00000142655	5195	F>L:Probably deleterious 75%	O75381	5	ID|5195;dbNSFP_Ancestral_allele|C;dbNSFP_CCDSid|CCDS30582.1;dbNSFP_GERP_NR|5.29;dbNSFP_GERP_RS|2.72;dbNSFP_LRT_pred|D;dbNSFP_LRT_score|1.0;dbNSFP_MutTaster_pred|P;dbNSFP_MutTaster_score|0.99986;dbNSFP_PhyloP_pred|C;dbNSFP_PhyloP_score|0.981551;dbNSFP_Polyphen2_pred|D;dbNSFP_Polyphen2_score|0.999;dbNSFP_SIFT_pred|D;dbNSFP_SIFT_score|1.0;dbNSFP_aa_altref|L;dbNSFP_aa_pos|52;dbNSFP_aa_ref|F;dbNSFP_al…	11422729
hg19	1	10596341	10596342	10596341	10596341	+	PEX14	26	5195	F>L:Probably deleterious 75%	5195	N/A	O75381	ENSG00000142655	chr1	10596341	10596342	5195	C	CCDS30582.1	Probably deleterious 75%	5.29	2.72	D	1	P	0.999851	C	0.981551	D	0.999	D	1	F>L	L	52	F	G	C	ENSG00000142655	5195	F>L:Probably deleterious 75%	O75381	5	ID|5195;dbNSFP_Ancestral_allele|C;dbNSFP_CCDSid|CCDS30582.1;dbNSFP_GERP_NR|5.29;dbNSFP_GERP_RS|2.72;dbNSFP_LRT_pred|D;dbNSFP_LRT_score|1.0;dbNSFP_MutTaster_pred|P;dbNSFP_MutTaster_score|0.999851;dbNSFP_PhyloP_pred|C;dbNSFP_PhyloP_score|0.981551;dbNSFP_Polyphen2_pred|D;dbNSFP_Polyphen2_score|0.999;dbNSFP_SIFT_pred|D;dbNSFP_SIFT_score|1.0;dbNSFP_aa_altref|L;dbNSFP_aa_pos|52;dbNSFP_aa_ref|F;dbNSFP_a…	11422731
hg19	1	10596341	10596342	10596342	10596342	+	PEX14	26	5195	L>I:Probably deleterious 75%	5195	N/A	O75381	ENSG00000142655	chr1	10596341	10596342	5195	C	CCDS30582.1	Probably deleterious 75%	5.29	5.29	D	0.999996	D	0.998894	C	0.998931	D	0.984	D	1	L>I	I	53	L	A	C	ENSG00000142655	5195	L>I:Probably deleterious 75%	O75381	5	ID|5195;dbNSFP_Ancestral_allele|C;dbNSFP_CCDSid|CCDS30582.1;dbNSFP_GERP_NR|5.29;dbNSFP_GERP_RS|5.29;dbNSFP_LRT_pred|D;dbNSFP_LRT_score|0.999996;dbNSFP_MutTaster_pred|D;dbNSFP_MutTaster_score|0.998894;dbNSFP_PhyloP_pred|C;dbNSFP_PhyloP_score|0.998931;dbNSFP_Polyphen2_pred|D;dbNSFP_Polyphen2_score|0.984;dbNSFP_SIFT_pred|D;dbNSFP_SIFT_score|1.0;dbNSFP_aa_altref|I;dbNSFP_aa_pos|53;dbNSFP_aa_ref|L;dbN…	11422733
hg19	1	10596341	10596342	10596342	10596342	+	PEX14	26	5195	L>V:Probably deleterious 75%	5195	N/A	O75381	ENSG00000142655	chr1	10596341	10596342	5195	C	CCDS30582.1	Probably deleterious 75%	5.29	5.29	D	0.999996	D	0.999429	C	0.998931	D	0.993	D	1	L>V	V	53	L	G	C	ENSG00000142655	5195	L>V:Probably deleterious 75%	O75381	5	ID|5195;dbNSFP_Ancestral_allele|C;dbNSFP_CCDSid|CCDS30582.1;dbNSFP_GERP_NR|5.29;dbNSFP_GERP_RS|5.29;dbNSFP_LRT_pred|D;dbNSFP_LRT_score|0.999996;dbNSFP_MutTaster_pred|D;dbNSFP_MutTaster_score|0.999429;dbNSFP_PhyloP_pred|C;dbNSFP_PhyloP_score|0.998931;dbNSFP_Polyphen2_pred|D;dbNSFP_Polyphen2_score|0.993;dbNSFP_SIFT_pred|D;dbNSFP_SIFT_score|1.0;dbNSFP_aa_altref|V;dbNSFP_aa_pos|53;dbNSFP_aa_ref|L;dbN…	11422735
hg19	14	37135752	37135753	37135752	37135752	+	PAX9	26	5083	H>Q:Probably deleterious 25%	5083	N/A	P55771	ENSG00000198807	chr14	37135752	37135753	5083	C	CCDS9662.1	Probably deleterious 25%	4.98	2.07	N	0.999691	D	0.820613	N	0.909224	D	0.949	NA	0.933222	H>Q	Q	239	H	A	C	ENSG00000198807	5083	H>Q:Probably deleterious 25%	P55771	6	ID|5083;dbNSFP_Ancestral_allele|C;dbNSFP_CCDSid|CCDS9662.1;dbNSFP_GERP_NR|4.98;dbNSFP_GERP_RS|2.07;dbNSFP_LRT_pred|N;dbNSFP_LRT_score|0.999691;dbNSFP_MutTaster_pred|D;dbNSFP_MutTaster_score|0.820613;dbNSFP_PhyloP_pred|N;dbNSFP_PhyloP_score|0.909224;dbNSFP_Polyphen2_pred|D;dbNSFP_Polyphen2_score|0.949;dbNSFP_SIFT_pred|NA;dbNSFP_SIFT_score|0.933222;dbNSFP_aa_altref|Q;dbNSFP_aa_pos|239;dbNSFP_aa_ref…	43001699
hg19	14	37135752	37135753	37135752	37135752	+	PAX9	26	5083	H>Q:Probably deleterious 25%	5083	N/A	P55771	ENSG00000198807	chr14	37135752	37135753	5083	C	CCDS9662.1	Probably deleterious 25%	4.98	2.07	N	0.999691	D	0.802981	N	0.909224	D	0.949	NA	0.932129	H>Q	Q	239	H	G	C	ENSG00000198807	5083	H>Q:Probably deleterious 25%	P55771	6	ID|5083;dbNSFP_Ancestral_allele|C;dbNSFP_CCDSid|CCDS9662.1;dbNSFP_GERP_NR|4.98;dbNSFP_GERP_RS|2.07;dbNSFP_LRT_pred|N;dbNSFP_LRT_score|0.999691;dbNSFP_MutTaster_pred|D;dbNSFP_MutTaster_score|0.802981;dbNSFP_PhyloP_pred|N;dbNSFP_PhyloP_score|0.909224;dbNSFP_Polyphen2_pred|D;dbNSFP_Polyphen2_score|0.949;dbNSFP_SIFT_pred|NA;dbNSFP_SIFT_score|0.932129;dbNSFP_aa_altref|Q;dbNSFP_aa_pos|239;dbNSFP_aa_ref…	43001701
hg19	8	76465360	76465361	76465361	76465361	+	HNF4G	26	3174	Q>K:Probably deleterious 25%	3174	N/A	Q14541	ENSG00000164749	chr8	76465360	76465361	3174	C	CCDS6220.2	Probably deleterious 25%	4.97	4.97	D	0.999999	D	0.999721	C	0.999135	P	0.673	T	0.54	Q>K	K	182	Q	A	C	ENSG00000164749	3174	Q>K:Probably deleterious 25%	Q14541	10	ID|3174;dbNSFP_Ancestral_allele|C;dbNSFP_CCDSid|CCDS6220.2;dbNSFP_GERP_NR|4.97;dbNSFP_GERP_RS|4.97;dbNSFP_LRT_pred|D;dbNSFP_LRT_score|0.999999;dbNSFP_MutTaster_pred|D;dbNSFP_MutTaster_score|0.999721;dbNSFP_PhyloP_pred|C;dbNSFP_PhyloP_score|0.999135;dbNSFP_Polyphen2_pred|P;dbNSFP_Polyphen2_score|0.673;dbNSFP_SIFT_pred|T;dbNSFP_SIFT_score|0.54;dbNSFP_aa_altref|K;dbNSFP_aa_pos|182;dbNSFP_aa_ref|Q;db…	135320625
hg19	8	76465360	76465361	76465361	76465361	+	HNF4G	26	3174	Q>E:Probably deleterious 25%	3174	N/A	Q14541	ENSG00000164749	chr8	76465360	76465361	3174	C	CCDS6220.2	Probably deleterious 25%	4.97	4.97	D	0.999999	D	0.999479	C	0.999135	B	0.059	T	0.88	Q>E	E	182	Q	G	C	ENSG00000164749	3174	Q>E:Probably deleterious 25%	Q14541	10	ID|3174;dbNSFP_Ancestral_allele|C;dbNSFP_CCDSid|CCDS6220.2;dbNSFP_GERP_NR|4.97;dbNSFP_GERP_RS|4.97;dbNSFP_LRT_pred|D;dbNSFP_LRT_score|0.999999;dbNSFP_MutTaster_pred|D;dbNSFP_MutTaster_score|0.999479;dbNSFP_PhyloP_pred|C;dbNSFP_PhyloP_score|0.999135;dbNSFP_Polyphen2_pred|B;dbNSFP_Polyphen2_score|0.059;dbNSFP_SIFT_pred|T;dbNSFP_SIFT_score|0.88;dbNSFP_aa_altref|E;dbNSFP_aa_pos|182;dbNSFP_aa_ref|Q;db…	135320627
hg19	8	76465360	76465361	76465361	76465361	+	HNF4G	26	3174	Q>X:Probably deleterious 50%	3174	N/A	Q14541	ENSG00000164749	chr8	76465360	76465361	3174	C	CCDS6220.2	Probably deleterious 50%	4.97	4.97	D	0.999999	A	1	C	0.999135	NA	0.735417	NA	0.903799	Q>X	X	182	Q	T	C	ENSG00000164749	3174	Q>X:Probably deleterious 50%	Q14541	10	ID|3174;dbNSFP_Ancestral_allele|C;dbNSFP_CCDSid|CCDS6220.2;dbNSFP_GERP_NR|4.97;dbNSFP_GERP_RS|4.97;dbNSFP_LRT_pred|D;dbNSFP_LRT_score|0.999999;dbNSFP_MutTaster_pred|A;dbNSFP_MutTaster_score|1.0;dbNSFP_PhyloP_pred|C;dbNSFP_PhyloP_score|0.999135;dbNSFP_Polyphen2_pred|NA;dbNSFP_Polyphen2_score|0.735417;dbNSFP_SIFT_pred|NA;dbNSFP_SIFT_score|0.903799;dbNSFP_aa_altref|X;dbNSFP_aa_pos|182;dbNSFP_aa_ref|…	135320629
hg19	5	44809162	44809163	44809163	44809163	+	MRPS30	26	10884	C>X:Harmless 25%	10884	N/A	Q9NP92	ENSG00000112996	chr5	44809162	44809163	10884	C	CCDS3951.1	Harmless 25%	4.53	-9.06	N	0.008877	NA	0	N	0.012588	NA	0.048374	NA	0.694636	C>X	X	33	C	A	C	ENSG00000112996	10884	C>X:Harmless 25%	Q9NP92	13	ID|10884;dbNSFP_Ancestral_allele|C;dbNSFP_CCDSid|CCDS3951.1;dbNSFP_GERP_NR|4.53;dbNSFP_GERP_RS|-9.06;dbNSFP_LRT_pred|N;dbNSFP_LRT_score|0.008877;dbNSFP_MutTaster_pred|NA;dbNSFP_MutTaster_score|0.0;dbNSFP_PhyloP_pred|N;dbNSFP_PhyloP_score|0.012588;dbNSFP_Polyphen2_pred|NA;dbNSFP_Polyphen2_score|0.048374;dbNSFP_SIFT_pred|NA;dbNSFP_SIFT_score|0.694636;dbNSFP_aa_altref|X;dbNSFP_aa_pos|33;dbNSFP_aa_re…	112688857
hg19	5	44809162	44809163	44809163	44809163	+	MRPS30	26	10884	C>W:Probably deleterious 25%	10884	N/A	Q9NP92	ENSG00000112996	chr5	44809162	44809163	10884	C	CCDS3951.1	Probably deleterious 25%	4.53	-9.06	N	0.008877	NA	0.074283	N	0.012588	D	0.96	T	0.94	C>W	W	33	C	G	C	ENSG00000112996	10884	C>W:Probably deleterious 25%	Q9NP92	13	ID|10884;dbNSFP_Ancestral_allele|C;dbNSFP_CCDSid|CCDS3951.1;dbNSFP_GERP_NR|4.53;dbNSFP_GERP_RS|-9.06;dbNSFP_LRT_pred|N;dbNSFP_LRT_score|0.008877;dbNSFP_MutTaster_pred|NA;dbNSFP_MutTaster_score|0.074283;dbNSFP_PhyloP_pred|N;dbNSFP_PhyloP_score|0.012588;dbNSFP_Polyphen2_pred|D;dbNSFP_Polyphen2_score|0.96;dbNSFP_SIFT_pred|T;dbNSFP_SIFT_score|0.94;dbNSFP_aa_altref|W;dbNSFP_aa_pos|33;dbNSFP_aa_ref|C;d…	112688859
hg19	6	13711279	13711280	13711280	13711280	-	RANBP9	26	10048	R>H:Probably deleterious 25%	10048	N/A	Q96S59	ENSG00000010017	chr6	13711279	13711280	10048	C	CCDS4529.1	Probably deleterious 25%	3.46	2.28	N	0.989822	D	0.996433	N	0.912709	B	0.021	D	1	R>H	H	153	R	T	C	ENSG00000010017	10048	R>H:Probably deleterious 25%	Q96S59	18	ID|10048;dbNSFP_Ancestral_allele|C;dbNSFP_CCDSid|CCDS4529.1;dbNSFP_GERP_NR|3.46;dbNSFP_GERP_RS|2.28;dbNSFP_LRT_pred|N;dbNSFP_LRT_score|0.989822;dbNSFP_MutTaster_pred|D;dbNSFP_MutTaster_score|0.996433;dbNSFP_PhyloP_pred|N;dbNSFP_PhyloP_score|0.912709;dbNSFP_Polyphen2_pred|B;dbNSFP_Polyphen2_score|0.021;dbNSFP_SIFT_pred|D;dbNSFP_SIFT_score|1.0;dbNSFP_aa_altref|H;dbNSFP_aa_pos|153;dbNSFP_aa_ref|R;db…	119194313
hg19	6	13711279	13711280	13711280	13711280	-	RANBP9	26	10048	R>P:Probably deleterious 50%	10048	N/A	Q96S59	ENSG00000010017	chr6	13711279	13711280	10048	C	CCDS4529.1	Probably deleterious 50%	3.46	2.28	N	0.989822	D	0.998797	N	0.912709	D	0.976	D	1	R>P	P	153	R	G	C	ENSG00000010017	10048	R>P:Probably deleterious 50%	Q96S59	18	ID|10048;dbNSFP_Ancestral_allele|C;dbNSFP_CCDSid|CCDS4529.1;dbNSFP_GERP_NR|3.46;dbNSFP_GERP_RS|2.28;dbNSFP_LRT_pred|N;dbNSFP_LRT_score|0.989822;dbNSFP_MutTaster_pred|D;dbNSFP_MutTaster_score|0.998797;dbNSFP_PhyloP_pred|N;dbNSFP_PhyloP_score|0.912709;dbNSFP_Polyphen2_pred|D;dbNSFP_Polyphen2_score|0.976;dbNSFP_SIFT_pred|D;dbNSFP_SIFT_score|1.0;dbNSFP_aa_altref|P;dbNSFP_aa_pos|153;dbNSFP_aa_ref|R;db…	119194315
hg19	6	13711279	13711280	13711280	13711280	-	RANBP9	26	10048	R>L:Unknown 25%	10048	N/A	Q96S59	ENSG00000010017	chr6	13711279	13711280	10048	C	CCDS4529.1	Unknown 25%	3.46	2.28	N	0.989822	D	0.998797	N	0.912709	B	0.051	T	0.94	R>L	L	153	R	A	C	ENSG00000010017	10048	R>L:Unknown 25%	Q96S59	18	ID|10048;dbNSFP_Ancestral_allele|C;dbNSFP_CCDSid|CCDS4529.1;dbNSFP_GERP_NR|3.46;dbNSFP_GERP_RS|2.28;dbNSFP_LRT_pred|N;dbNSFP_LRT_score|0.989822;dbNSFP_MutTaster_pred|D;dbNSFP_MutTaster_score|0.998797;dbNSFP_PhyloP_pred|N;dbNSFP_PhyloP_score|0.912709;dbNSFP_Polyphen2_pred|B;dbNSFP_Polyphen2_score|0.051;dbNSFP_SIFT_pred|T;dbNSFP_SIFT_score|0.94;dbNSFP_aa_altref|L;dbNSFP_aa_pos|153;dbNSFP_aa_ref|R;d…	119194317
hg19	19	18538742	18538743	18538743	18538743	+	SSBP4	26	170463	R>K:Probably deleterious 50%	170463	N/A	Q9BWG4	ENSG00000130511	chr19	18538742	18538743	170463	G	CCDS12378.1	Probably deleterious 50%	3.32	3.32	U	0.999996	N	0.41279	C	0.997585	D	0.99	D	0.99	R>K	K	77	R	A	G	ENSG00000130511	170463	R>K:Probably deleterious 50%	Q9BWG4	1	ID|170463;dbNSFP_Ancestral_allele|G;dbNSFP_CCDSid|CCDS12378.1;dbNSFP_GERP_NR|3.32;dbNSFP_GERP_RS|3.32;dbNSFP_LRT_pred|U;dbNSFP_LRT_score|0.999996;dbNSFP_MutTaster_pred|N;dbNSFP_MutTaster_score|0.41279;dbNSFP_PhyloP_pred|C;dbNSFP_PhyloP_score|0.997585;dbNSFP_Polyphen2_pred|D;dbNSFP_Polyphen2_score|0.99;dbNSFP_SIFT_pred|D;dbNSFP_SIFT_score|0.99;dbNSFP_aa_altref|K;dbNSFP_aa_pos|77;dbNSFP_aa_ref|R;db…	71439245
hg19	19	18538742	18538743	18538743	18538743	+	SSBP4	26	170463	R>T:Probably deleterious 50%	170463	N/A	Q9BWG4	ENSG00000130511	chr19	18538742	18538743	170463	G	CCDS12378.1	Probably deleterious 50%	3.32	3.32	U	0.999996	D	0.869194	C	0.997585	D	0.998	D	1	R>T	T	77	R	C	G	ENSG00000130511	170463	R>T:Probably deleterious 50%	Q9BWG4	1	ID|170463;dbNSFP_Ancestral_allele|G;dbNSFP_CCDSid|CCDS12378.1;dbNSFP_GERP_NR|3.32;dbNSFP_GERP_RS|3.32;dbNSFP_LRT_pred|U;dbNSFP_LRT_score|0.999996;dbNSFP_MutTaster_pred|D;dbNSFP_MutTaster_score|0.869194;dbNSFP_PhyloP_pred|C;dbNSFP_PhyloP_score|0.997585;dbNSFP_Polyphen2_pred|D;dbNSFP_Polyphen2_score|0.998;dbNSFP_SIFT_pred|D;dbNSFP_SIFT_score|1.0;dbNSFP_aa_altref|T;dbNSFP_aa_pos|77;dbNSFP_aa_ref|R;d…	71439247
hg19	19	18538742	18538743	18538743	18538743	+	SSBP4	26	170463	R>I:Probably deleterious 50%	170463	N/A	Q9BWG4	ENSG00000130511	chr19	18538742	18538743	170463	G	CCDS12378.1	Probably deleterious 50%	3.32	3.32	U	0.999996	D	0.900289	C	0.997585	D	0.999	D	1	R>I	I	77	R	T	G	ENSG00000130511	170463	R>I:Probably deleterious 50%	Q9BWG4	1	ID|170463;dbNSFP_Ancestral_allele|G;dbNSFP_CCDSid|CCDS12378.1;dbNSFP_GERP_NR|3.32;dbNSFP_GERP_RS|3.32;dbNSFP_LRT_pred|U;dbNSFP_LRT_score|0.999996;dbNSFP_MutTaster_pred|D;dbNSFP_MutTaster_score|0.900289;dbNSFP_PhyloP_pred|C;dbNSFP_PhyloP_score|0.997585;dbNSFP_Polyphen2_pred|D;dbNSFP_Polyphen2_score|0.999;dbNSFP_SIFT_pred|D;dbNSFP_SIFT_score|1.0;dbNSFP_aa_altref|I;dbNSFP_aa_pos|77;dbNSFP_aa_ref|R;d…	71439249
hg19	19	18538742	18538743	18538743	18538743	+	SSBP4	26	170463	R>K:Probably deleterious 50%	170463	N/A	Q9BWG4	ENSG00000130511	chr19	18538742	18538743	170463	G	CCDS32960.1	Probably deleterious 50%	3.32	3.32	U	0.999996	N	0.41279	C	0.997585	D	0.99	D	0.99	R>K	K	77	R	A	G	ENSG00000130511	170463	R>K:Probably deleterious 50%	Q9BWG4	1	ID|170463;dbNSFP_Ancestral_allele|G;dbNSFP_CCDSid|CCDS32960.1;dbNSFP_GERP_NR|3.32;dbNSFP_GERP_RS|3.32;dbNSFP_LRT_pred|U;dbNSFP_LRT_score|0.999996;dbNSFP_MutTaster_pred|N;dbNSFP_MutTaster_score|0.41279;dbNSFP_PhyloP_pred|C;dbNSFP_PhyloP_score|0.997585;dbNSFP_Polyphen2_pred|D;dbNSFP_Polyphen2_score|0.99;dbNSFP_SIFT_pred|D;dbNSFP_SIFT_score|0.99;dbNSFP_aa_altref|K;dbNSFP_aa_pos|77;dbNSFP_aa_ref|R;db…	75845117
hg19	19	18538742	18538743	18538743	18538743	+	SSBP4	26	170463	R>T:Probably deleterious 50%	170463	N/A	Q9BWG4	ENSG00000130511	chr19	18538742	18538743	170463	G	CCDS32960.1	Probably deleterious 50%	3.32	3.32	U	0.999996	D	0.869194	C	0.997585	D	0.998	D	1	R>T	T	77	R	C	G	ENSG00000130511	170463	R>T:Probably deleterious 50%	Q9BWG4	1	ID|170463;dbNSFP_Ancestral_allele|G;dbNSFP_CCDSid|CCDS32960.1;dbNSFP_GERP_NR|3.32;dbNSFP_GERP_RS|3.32;dbNSFP_LRT_pred|U;dbNSFP_LRT_score|0.999996;dbNSFP_MutTaster_pred|D;dbNSFP_MutTaster_score|0.869194;dbNSFP_PhyloP_pred|C;dbNSFP_PhyloP_score|0.997585;dbNSFP_Polyphen2_pred|D;dbNSFP_Polyphen2_score|0.998;dbNSFP_SIFT_pred|D;dbNSFP_SIFT_score|1.0;dbNSFP_aa_altref|T;dbNSFP_aa_pos|77;dbNSFP_aa_ref|R;d…	75845119
hg19	19	18538742	18538743	18538743	18538743	+	SSBP4	26	170463	R>I:Probably deleterious 50%	170463	N/A	Q9BWG4	ENSG00000130511	chr19	18538742	18538743	170463	G	CCDS32960.1	Probably deleterious 50%	3.32	3.32	U	0.999996	D	0.900289	C	0.997585	D	0.999	D	1	R>I	I	77	R	T	G	ENSG00000130511	170463	R>I:Probably deleterious 50%	Q9BWG4	1	ID|170463;dbNSFP_Ancestral_allele|G;dbNSFP_CCDSid|CCDS32960.1;dbNSFP_GERP_NR|3.32;dbNSFP_GERP_RS|3.32;dbNSFP_LRT_pred|U;dbNSFP_LRT_score|0.999996;dbNSFP_MutTaster_pred|D;dbNSFP_MutTaster_score|0.900289;dbNSFP_PhyloP_pred|C;dbNSFP_PhyloP_score|0.997585;dbNSFP_Polyphen2_pred|D;dbNSFP_Polyphen2_score|0.999;dbNSFP_SIFT_pred|D;dbNSFP_SIFT_score|1.0;dbNSFP_aa_altref|I;dbNSFP_aa_pos|77;dbNSFP_aa_ref|R;d…	75845121
hg19	11	65667796	65667797	65667796	65667796	-	FOSL1	26	8061	F>L:Unknown 25%	8061	N/A	P15407	ENSG00000175592	chr11	65667796	65667797	8061	G	CCDS8121.1	Unknown 25%	3.72	2.13	N	0.996148	N	0.053603	C	0.987923	P	0.497	T	0.9	F>L	L	5	F	T	G	ENSG00000175592	8061	F>L:Unknown 25%	P15407	2	ID|8061;dbNSFP_Ancestral_allele|G;dbNSFP_CCDSid|CCDS8121.1;dbNSFP_GERP_NR|3.72;dbNSFP_GERP_RS|2.13;dbNSFP_LRT_pred|N;dbNSFP_LRT_score|0.996148;dbNSFP_MutTaster_pred|N;dbNSFP_MutTaster_score|0.053603;dbNSFP_PhyloP_pred|C;dbNSFP_PhyloP_score|0.987923;dbNSFP_Polyphen2_pred|P;dbNSFP_Polyphen2_score|0.497;dbNSFP_SIFT_pred|T;dbNSFP_SIFT_score|0.9;dbNSFP_aa_altref|L;dbNSFP_aa_pos|5;dbNSFP_aa_ref|F;dbNSF…	25923243
hg19	11	65667796	65667797	65667796	65667796	-	FOSL1	26	8061	F>L:Unknown 25%	8061	N/A	P15407	ENSG00000175592	chr11	65667796	65667797	8061	G	CCDS8121.1	Unknown 25%	3.72	2.13	N	0.996148	N	0.055763	C	0.987923	P	0.497	T	0.9	F>L	L	5	F	C	G	ENSG00000175592	8061	F>L:Unknown 25%	P15407	2	ID|8061;dbNSFP_Ancestral_allele|G;dbNSFP_CCDSid|CCDS8121.1;dbNSFP_GERP_NR|3.72;dbNSFP_GERP_RS|2.13;dbNSFP_LRT_pred|N;dbNSFP_LRT_score|0.996148;dbNSFP_MutTaster_pred|N;dbNSFP_MutTaster_score|0.055763;dbNSFP_PhyloP_pred|C;dbNSFP_PhyloP_score|0.987923;dbNSFP_Polyphen2_pred|P;dbNSFP_Polyphen2_score|0.497;dbNSFP_SIFT_pred|T;dbNSFP_SIFT_score|0.9;dbNSFP_aa_altref|L;dbNSFP_aa_pos|5;dbNSFP_aa_ref|F;dbNSF…	25923245
hg19	17	53076799	53076800	53076800	53076800	+	STXBP4	26	252983	G>E:Probably deleterious 25%	252983	N/A	Q6ZWJ1	ENSG00000166263	chr17	53076799	53076800	252983	G	CCDS11584.2	Probably deleterious 25%	5.57	4.03	D	0.999984	N	1.6e-05	C	0.974767	B	0	T	0.88	G>E	E	92	G	A	G	ENSG00000166263	252983	G>E:Probably deleterious 25%	Q6ZWJ1	4	ID|252983;dbNSFP_Ancestral_allele|G;dbNSFP_CCDSid|CCDS11584.2;dbNSFP_GERP_NR|5.57;dbNSFP_GERP_RS|4.03;dbNSFP_LRT_pred|D;dbNSFP_LRT_score|0.999984;dbNSFP_MutTaster_pred|N;dbNSFP_MutTaster_score|1.6E-5;dbNSFP_PhyloP_pred|C;dbNSFP_PhyloP_score|0.974767;dbNSFP_Polyphen2_pred|B;dbNSFP_Polyphen2_score|0.0;dbNSFP_SIFT_pred|T;dbNSFP_SIFT_score|0.88;dbNSFP_aa_altref|E;dbNSFP_aa_pos|92;dbNSFP_aa_ref|G;dbNS…	62296103
hg19	17	53076799	53076800	53076800	53076800	+	STXBP4	26	252983	G>A:Probably deleterious 25%	252983	N/A	Q6ZWJ1	ENSG00000166263	chr17	53076799	53076800	252983	G	CCDS11584.2	Probably deleterious 25%	5.57	4.03	D	0.999984	N	6e-06	C	0.974767	B	0	T	0.91	G>A	A	92	G	C	G	ENSG00000166263	252983	G>A:Probably deleterious 25%	Q6ZWJ1	4	ID|252983;dbNSFP_Ancestral_allele|G;dbNSFP_CCDSid|CCDS11584.2;dbNSFP_GERP_NR|5.57;dbNSFP_GERP_RS|4.03;dbNSFP_LRT_pred|D;dbNSFP_LRT_score|0.999984;dbNSFP_MutTaster_pred|N;dbNSFP_MutTaster_score|6.0E-6;dbNSFP_PhyloP_pred|C;dbNSFP_PhyloP_score|0.974767;dbNSFP_Polyphen2_pred|B;dbNSFP_Polyphen2_score|0.0;dbNSFP_SIFT_pred|T;dbNSFP_SIFT_score|0.91;dbNSFP_aa_altref|A;dbNSFP_aa_pos|92;dbNSFP_aa_ref|G;dbNS…	62296105
hg19	17	53076799	53076800	53076800	53076800	+	STXBP4	26	252983	G>V:Probably deleterious 25%	252983	N/A	Q6ZWJ1	ENSG00000166263	chr17	53076799	53076800	252983	G	CCDS11584.2	Probably deleterious 25%	5.57	4.03	D	0.999984	N	3.8e-05	C	0.974767	B	0	T	0.95	G>V	V	92	G	T	G	ENSG00000166263	252983	G>V:Probably deleterious 25%	Q6ZWJ1	4	ID|252983;dbNSFP_Ancestral_allele|G;dbNSFP_CCDSid|CCDS11584.2;dbNSFP_GERP_NR|5.57;dbNSFP_GERP_RS|4.03;dbNSFP_LRT_pred|D;dbNSFP_LRT_score|0.999984;dbNSFP_MutTaster_pred|N;dbNSFP_MutTaster_score|3.8E-5;dbNSFP_PhyloP_pred|C;dbNSFP_PhyloP_score|0.974767;dbNSFP_Polyphen2_pred|B;dbNSFP_Polyphen2_score|0.0;dbNSFP_SIFT_pred|T;dbNSFP_SIFT_score|0.95;dbNSFP_aa_altref|V;dbNSFP_aa_pos|92;dbNSFP_aa_ref|G;dbNS…	62296107
hg19	14	37135752	37135753	37135753	37135753	+	PAX9	26	5083	A>T:Probably harmless 25%	5083	N/A	P55771	ENSG00000198807	chr14	37135752	37135753	5083	G	CCDS9662.1	Probably harmless 25%	4.98	3.81	N	0.997025	N	0.013125	C	0.999467	B	0	NA	0.689191	A>T	T	240	A	A	G	ENSG00000198807	5083	A>T:Probably harmless 25%	P55771	6	ID|5083;dbNSFP_Ancestral_allele|G;dbNSFP_CCDSid|CCDS9662.1;dbNSFP_GERP_NR|4.98;dbNSFP_GERP_RS|3.81;dbNSFP_LRT_pred|N;dbNSFP_LRT_score|0.997025;dbNSFP_MutTaster_pred|N;dbNSFP_MutTaster_score|0.013125;dbNSFP_PhyloP_pred|C;dbNSFP_PhyloP_score|0.999467;dbNSFP_Polyphen2_pred|B;dbNSFP_Polyphen2_score|0.0;dbNSFP_SIFT_pred|NA;dbNSFP_SIFT_score|0.689191;dbNSFP_aa_altref|T;dbNSFP_aa_pos|240;dbNSFP_aa_ref|A…	43001703
hg19	14	37135752	37135753	37135753	37135753	+	PAX9	26	5083	A>P:Probably harmless 25%	5083	N/A	P55771	ENSG00000198807	chr14	37135752	37135753	5083	G	CCDS9662.1	Probably harmless 25%	4.98	3.81	N	0.997025	N	0.042964	C	0.999467	B	0	NA	0.69104	A>P	P	240	A	C	G	ENSG00000198807	5083	A>P:Probably harmless 25%	P55771	6	ID|5083;dbNSFP_Ancestral_allele|G;dbNSFP_CCDSid|CCDS9662.1;dbNSFP_GERP_NR|4.98;dbNSFP_GERP_RS|3.81;dbNSFP_LRT_pred|N;dbNSFP_LRT_score|0.997025;dbNSFP_MutTaster_pred|N;dbNSFP_MutTaster_score|0.042964;dbNSFP_PhyloP_pred|C;dbNSFP_PhyloP_score|0.999467;dbNSFP_Polyphen2_pred|B;dbNSFP_Polyphen2_score|0.0;dbNSFP_SIFT_pred|NA;dbNSFP_SIFT_score|0.69104;dbNSFP_aa_altref|P;dbNSFP_aa_pos|240;dbNSFP_aa_ref|A;…	43001705
hg19	14	37135752	37135753	37135753	37135753	+	PAX9	26	5083	A>S:Probably harmless 25%	5083	N/A	P55771	ENSG00000198807	chr14	37135752	37135753	5083	G	CCDS9662.1	Probably harmless 25%	4.98	3.81	N	0.997025	N	0.004898	C	0.999467	B	0.001	NA	0.68889	A>S	S	240	A	T	G	ENSG00000198807	5083	A>S:Probably harmless 25%	P55771	6	ID|5083;dbNSFP_Ancestral_allele|G;dbNSFP_CCDSid|CCDS9662.1;dbNSFP_GERP_NR|4.98;dbNSFP_GERP_RS|3.81;dbNSFP_LRT_pred|N;dbNSFP_LRT_score|0.997025;dbNSFP_MutTaster_pred|N;dbNSFP_MutTaster_score|0.004898;dbNSFP_PhyloP_pred|C;dbNSFP_PhyloP_score|0.999467;dbNSFP_Polyphen2_pred|B;dbNSFP_Polyphen2_score|0.0010;dbNSFP_SIFT_pred|NA;dbNSFP_SIFT_score|0.68889;dbNSFP_aa_altref|S;dbNSFP_aa_pos|240;dbNSFP_aa_ref…	43001707
hg19	5	158204425	158204426	158204425	158204425	-	EBF1	26	1879	Y>X:Probably deleterious 25%	1879	N/A	Q9UH73	ENSG00000164330	chr5	158204425	158204426	1879	G	CCDS4343.1	Probably deleterious 25%	5.31	0.398	D	1	P	1	N	0.223857	NA	0.607911	NA	0.841868	Y>X	X	344	Y	T	A	ENSG00000164330	1879	Y>X:Probably deleterious 25%	Q9UH73	7	ID|1879;dbNSFP_Ancestral_allele|G;dbNSFP_CCDSid|CCDS4343.1;dbNSFP_GERP_NR|5.31;dbNSFP_GERP_RS|0.398;dbNSFP_LRT_pred|D;dbNSFP_LRT_score|1.0;dbNSFP_MutTaster_pred|P;dbNSFP_MutTaster_score|1.0;dbNSFP_PhyloP_pred|N;dbNSFP_PhyloP_score|0.223857;dbNSFP_Polyphen2_pred|NA;dbNSFP_Polyphen2_score|0.607911;dbNSFP_SIFT_pred|NA;dbNSFP_SIFT_score|0.841868;dbNSFP_aa_altref|X;dbNSFP_aa_pos|344;dbNSFP_aa_ref|Y;db…	115683627
hg19	5	158204425	158204426	158204425	158204425	-	EBF1	26	1879	Y>X:Probably deleterious 25%	1879	N/A	Q9UH73	ENSG00000164330	chr5	158204425	158204426	1879	G	CCDS4343.1	Probably deleterious 25%	5.31	0.398	D	1	P	1	N	0.223857	NA	0.607911	NA	0.841868	Y>X	X	344	Y	C	A	ENSG00000164330	1879	Y>X:Probably deleterious 25%	Q9UH73	7	ID|1879;dbNSFP_Ancestral_allele|G;dbNSFP_CCDSid|CCDS4343.1;dbNSFP_GERP_NR|5.31;dbNSFP_GERP_RS|0.398;dbNSFP_LRT_pred|D;dbNSFP_LRT_score|1.0;dbNSFP_MutTaster_pred|P;dbNSFP_MutTaster_score|1.0;dbNSFP_PhyloP_pred|N;dbNSFP_PhyloP_score|0.223857;dbNSFP_Polyphen2_pred|NA;dbNSFP_Polyphen2_score|0.607911;dbNSFP_SIFT_pred|NA;dbNSFP_SIFT_score|0.841868;dbNSFP_aa_altref|X;dbNSFP_aa_pos|344;dbNSFP_aa_ref|Y;db…	115683629
hg19	2	202154200	202154201	202154201	202154201	-	ALS2CR12	26	130540	T>K:Unknown 25%	130540	N/A	Q96Q35	ENSG00000155749	chr2	202154200	202154201	130540	G	CCDS2346.1	Unknown 25%	3.8	0.564	N	0.992641	N	0.0035	N	0.876414	P	0.345	T	0.63	T>K	K	397	T	T	G	ENSG00000155749	130540	T>K:Unknown 25%	Q96Q35	8	ID|130540;dbNSFP_Ancestral_allele|G;dbNSFP_CCDSid|CCDS2346.1;dbNSFP_GERP_NR|3.8;dbNSFP_GERP_RS|0.564;dbNSFP_LRT_pred|N;dbNSFP_LRT_score|0.992641;dbNSFP_MutTaster_pred|N;dbNSFP_MutTaster_score|0.0035;dbNSFP_PhyloP_pred|N;dbNSFP_PhyloP_score|0.876414;dbNSFP_Polyphen2_pred|P;dbNSFP_Polyphen2_score|0.345;dbNSFP_SIFT_pred|T;dbNSFP_SIFT_score|0.63;dbNSFP_aa_altref|K;dbNSFP_aa_pos|397;dbNSFP_aa_ref|T;db…	82972019
hg19	2	202154200	202154201	202154201	202154201	-	ALS2CR12	26	130540	T>R:Unknown 25%	130540	N/A	Q96Q35	ENSG00000155749	chr2	202154200	202154201	130540	G	CCDS2346.1	Unknown 25%	3.8	0.564	N	0.992641	N	0.004272	N	0.876414	P	0.345	T	0.73	T>R	R	397	T	C	G	ENSG00000155749	130540	T>R:Unknown 25%	Q96Q35	8	ID|130540;dbNSFP_Ancestral_allele|G;dbNSFP_CCDSid|CCDS2346.1;dbNSFP_GERP_NR|3.8;dbNSFP_GERP_RS|0.564;dbNSFP_LRT_pred|N;dbNSFP_LRT_score|0.992641;dbNSFP_MutTaster_pred|N;dbNSFP_MutTaster_score|0.004272;dbNSFP_PhyloP_pred|N;dbNSFP_PhyloP_score|0.876414;dbNSFP_Polyphen2_pred|P;dbNSFP_Polyphen2_score|0.345;dbNSFP_SIFT_pred|T;dbNSFP_SIFT_score|0.73;dbNSFP_aa_altref|R;dbNSFP_aa_pos|397;dbNSFP_aa_ref|T;…	82972021
hg19	2	202154200	202154201	202154201	202154201	-	ALS2CR12	26	130540	T>M:Probably harmless 25%	130540	N/A	Q96Q35	ENSG00000155749	chr2	202154200	202154201	130540	G	CCDS2346.1	Probably harmless 25%	3.8	0.564	N	0.992641	N	0.001984	N	0.876414	B	0.002	T	0.33	T>M	M	397	T	A	G	ENSG00000155749	130540	T>M:Probably harmless 25%	Q96Q35	8	ID|130540;dbNSFP_Ancestral_allele|G;dbNSFP_CCDSid|CCDS2346.1;dbNSFP_GERP_NR|3.8;dbNSFP_GERP_RS|0.564;dbNSFP_LRT_pred|N;dbNSFP_LRT_score|0.992641;dbNSFP_MutTaster_pred|N;dbNSFP_MutTaster_score|0.001984;dbNSFP_PhyloP_pred|N;dbNSFP_PhyloP_score|0.876414;dbNSFP_Polyphen2_pred|B;dbNSFP_Polyphen2_score|0.0020;dbNSFP_SIFT_pred|T;dbNSFP_SIFT_score|0.33;dbNSFP_aa_altref|M;dbNSFP_aa_pos|397;dbNSFP_aa_ref|T…	82972023
hg19	5	44809162	44809163	44809162	44809162	+	MRPS30	26	10884	C>Y:Probably deleterious 25%	10884	N/A	Q9NP92	ENSG00000112996	chr5	44809162	44809163	10884	G	CCDS3951.1	Probably deleterious 25%	4.53	-1.73	N	0.008877	NA	0.164406	N	0.820539	D	0.914	T	0.74	C>Y	Y	33	C	A	G	ENSG00000112996	10884	C>Y:Probably deleterious 25%	Q9NP92	13	ID|10884;dbNSFP_Ancestral_allele|G;dbNSFP_CCDSid|CCDS3951.1;dbNSFP_GERP_NR|4.53;dbNSFP_GERP_RS|-1.73;dbNSFP_LRT_pred|N;dbNSFP_LRT_score|0.008877;dbNSFP_MutTaster_pred|NA;dbNSFP_MutTaster_score|0.164406;dbNSFP_PhyloP_pred|N;dbNSFP_PhyloP_score|0.820539;dbNSFP_Polyphen2_pred|D;dbNSFP_Polyphen2_score|0.914;dbNSFP_SIFT_pred|T;dbNSFP_SIFT_score|0.74;dbNSFP_aa_altref|Y;dbNSFP_aa_pos|33;dbNSFP_aa_ref|C;…	112688851
hg19	5	44809162	44809163	44809162	44809162	+	MRPS30	26	10884	C>S:Unknown 25%	10884	N/A	Q9NP92	ENSG00000112996	chr5	44809162	44809163	10884	G	CCDS3951.1	Unknown 25%	4.53	-1.73	N	0.008877	NA	0.021462	N	0.820539	P	0.515	T	0.45	C>S	S	33	C	C	G	ENSG00000112996	10884	C>S:Unknown 25%	Q9NP92	13	ID|10884;dbNSFP_Ancestral_allele|G;dbNSFP_CCDSid|CCDS3951.1;dbNSFP_GERP_NR|4.53;dbNSFP_GERP_RS|-1.73;dbNSFP_LRT_pred|N;dbNSFP_LRT_score|0.008877;dbNSFP_MutTaster_pred|NA;dbNSFP_MutTaster_score|0.021462;dbNSFP_PhyloP_pred|N;dbNSFP_PhyloP_score|0.820539;dbNSFP_Polyphen2_pred|P;dbNSFP_Polyphen2_score|0.515;dbNSFP_SIFT_pred|T;dbNSFP_SIFT_score|0.45;dbNSFP_aa_altref|S;dbNSFP_aa_pos|33;dbNSFP_aa_ref|C;…	112688853
hg19	5	44809162	44809163	44809162	44809162	+	MRPS30	26	10884	C>F:Probably deleterious 25%	10884	N/A	Q9NP92	ENSG00000112996	chr5	44809162	44809163	10884	G	CCDS3951.1	Probably deleterious 25%	4.53	-1.73	N	0.008877	NA	0.171223	N	0.820539	D	0.914	T	0.78	C>F	F	33	C	T	G	ENSG00000112996	10884	C>F:Probably deleterious 25%	Q9NP92	13	ID|10884;dbNSFP_Ancestral_allele|G;dbNSFP_CCDSid|CCDS3951.1;dbNSFP_GERP_NR|4.53;dbNSFP_GERP_RS|-1.73;dbNSFP_LRT_pred|N;dbNSFP_LRT_score|0.008877;dbNSFP_MutTaster_pred|NA;dbNSFP_MutTaster_score|0.171223;dbNSFP_PhyloP_pred|N;dbNSFP_PhyloP_score|0.820539;dbNSFP_Polyphen2_pred|D;dbNSFP_Polyphen2_score|0.914;dbNSFP_SIFT_pred|T;dbNSFP_SIFT_score|0.78;dbNSFP_aa_altref|F;dbNSFP_aa_pos|33;dbNSFP_aa_ref|C;…	112688855
hg19	1	114449662	114449663	114449663	114449663	+	DCLRE1B	26	64858	V>I:Probably harmless 25%	64858	N/A	Q9H816	ENSG00000118655	chr1	114449662	114449663	64858	G	CCDS866.1	Probably harmless 25%	5.23	4.17	N	0.998868	N	0.023334	C	0.99238	B	0.047	T	0.59	V>I	I	79	V	A	G	ENSG00000118655	64858	V>I:Probably harmless 25%	Q9H816	14	ID|64858;dbNSFP_Ancestral_allele|G;dbNSFP_CCDSid|CCDS866.1;dbNSFP_GERP_NR|5.23;dbNSFP_GERP_RS|4.17;dbNSFP_LRT_pred|N;dbNSFP_LRT_score|0.998868;dbNSFP_MutTaster_pred|N;dbNSFP_MutTaster_score|0.023334;dbNSFP_PhyloP_pred|C;dbNSFP_PhyloP_score|0.99238;dbNSFP_Polyphen2_pred|B;dbNSFP_Polyphen2_score|0.047;dbNSFP_SIFT_pred|T;dbNSFP_SIFT_score|0.59;dbNSFP_aa_altref|I;dbNSFP_aa_pos|79;dbNSFP_aa_ref|V;dbNS…	6013517
hg19	1	114449662	114449663	114449663	114449663	+	DCLRE1B	26	64858	V>L:Unknown 25%	64858	N/A	Q9H816	ENSG00000118655	chr1	114449662	114449663	64858	G	CCDS866.1	Unknown 25%	5.23	4.17	N	0.998868	N	0.076277	C	0.99238	P	0.172	T	0.78	V>L	L	79	V	C	G	ENSG00000118655	64858	V>L:Unknown 25%	Q9H816	14	ID|64858;dbNSFP_Ancestral_allele|G;dbNSFP_CCDSid|CCDS866.1;dbNSFP_GERP_NR|5.23;dbNSFP_GERP_RS|4.17;dbNSFP_LRT_pred|N;dbNSFP_LRT_score|0.998868;dbNSFP_MutTaster_pred|N;dbNSFP_MutTaster_score|0.076277;dbNSFP_PhyloP_pred|C;dbNSFP_PhyloP_score|0.99238;dbNSFP_Polyphen2_pred|P;dbNSFP_Polyphen2_score|0.172;dbNSFP_SIFT_pred|T;dbNSFP_SIFT_score|0.78;dbNSFP_aa_altref|L;dbNSFP_aa_pos|79;dbNSFP_aa_ref|V;dbNS…	6013519
hg19	1	114449662	114449663	114449663	114449663	+	DCLRE1B	26	64858	V>L:Unknown 25%	64858	N/A	Q9H816	ENSG00000118655	chr1	114449662	114449663	64858	G	CCDS866.1	Unknown 25%	5.23	4.17	N	0.998868	N	0.076277	C	0.99238	P	0.172	T	0.78	V>L	L	79	V	T	G	ENSG00000118655	64858	V>L:Unknown 25%	Q9H816	14	ID|64858;dbNSFP_Ancestral_allele|G;dbNSFP_CCDSid|CCDS866.1;dbNSFP_GERP_NR|5.23;dbNSFP_GERP_RS|4.17;dbNSFP_LRT_pred|N;dbNSFP_LRT_score|0.998868;dbNSFP_MutTaster_pred|N;dbNSFP_MutTaster_score|0.076277;dbNSFP_PhyloP_pred|C;dbNSFP_PhyloP_score|0.99238;dbNSFP_Polyphen2_pred|P;dbNSFP_Polyphen2_score|0.172;dbNSFP_SIFT_pred|T;dbNSFP_SIFT_score|0.78;dbNSFP_aa_altref|L;dbNSFP_aa_pos|79;dbNSFP_aa_ref|V;dbNS…	6013521
hg19	11	65638719	65638720	65638719	65638719	-	EFEMP2	26	30008	H>Q:Probably deleterious 50%	30008	N/A	O95967	ENSG00000172638	chr11	65638719	65638720	30008	G	CCDS8116.1	Probably deleterious 50%	4.44	0.645	D	0.999861	P	0.019758	N	0.074126	D	0.877	T	0.8	H>Q	Q	92	H	T	G	ENSG00000172638	30008	H>Q:Probably deleterious 50%	O95967	16	ID|30008;dbNSFP_Ancestral_allele|G;dbNSFP_CCDSid|CCDS8116.1;dbNSFP_GERP_NR|4.44;dbNSFP_GERP_RS|0.645;dbNSFP_LRT_pred|D;dbNSFP_LRT_score|0.999861;dbNSFP_MutTaster_pred|P;dbNSFP_MutTaster_score|0.019758;dbNSFP_PhyloP_pred|N;dbNSFP_PhyloP_score|0.074126;dbNSFP_Polyphen2_pred|D;dbNSFP_Polyphen2_score|0.877;dbNSFP_SIFT_pred|T;dbNSFP_SIFT_score|0.8;dbNSFP_aa_altref|Q;dbNSFP_aa_pos|92;dbNSFP_aa_ref|H;db…	25900281
hg19	11	65638719	65638720	65638719	65638719	-	EFEMP2	26	30008	H>Q:Probably deleterious 50%	30008	N/A	O95967	ENSG00000172638	chr11	65638719	65638720	30008	G	CCDS8116.1	Probably deleterious 50%	4.44	0.645	D	0.999861	P	0.019463	N	0.074126	D	0.877	T	0.8	H>Q	Q	92	H	C	G	ENSG00000172638	30008	H>Q:Probably deleterious 50%	O95967	16	ID|30008;dbNSFP_Ancestral_allele|G;dbNSFP_CCDSid|CCDS8116.1;dbNSFP_GERP_NR|4.44;dbNSFP_GERP_RS|0.645;dbNSFP_LRT_pred|D;dbNSFP_LRT_score|0.999861;dbNSFP_MutTaster_pred|P;dbNSFP_MutTaster_score|0.019463;dbNSFP_PhyloP_pred|N;dbNSFP_PhyloP_score|0.074126;dbNSFP_Polyphen2_pred|D;dbNSFP_Polyphen2_score|0.877;dbNSFP_SIFT_pred|T;dbNSFP_SIFT_score|0.8;dbNSFP_aa_altref|Q;dbNSFP_aa_pos|92;dbNSFP_aa_ref|H;db…	25900283
hg19	6	151936677	151936678	151936677	151936677	+	C6orf97	26	80129	V>I:Harmless 100%	80129	N/A	Q8IYT3	ENSG00000120262	chr6	151936677	151936678	80129	G	CCDS43515.1	Harmless 100%	5.81	3.09	N	0.996132	P	0.168837	C	0.977871	B	0.003	T	0.16	V>I	I	604	V	A	G	ENSG00000120262	80129	V>I:Harmless 100%	Q8IYT3	19	ID|80129;dbNSFP_Ancestral_allele|G;dbNSFP_CCDSid|CCDS43515.1;dbNSFP_GERP_NR|5.81;dbNSFP_GERP_RS|3.09;dbNSFP_LRT_pred|N;dbNSFP_LRT_score|0.996132;dbNSFP_MutTaster_pred|P;dbNSFP_MutTaster_score|0.168837;dbNSFP_PhyloP_pred|C;dbNSFP_PhyloP_score|0.977871;dbNSFP_Polyphen2_pred|B;dbNSFP_Polyphen2_score|0.0030;dbNSFP_SIFT_pred|T;dbNSFP_SIFT_score|0.16;dbNSFP_aa_altref|I;dbNSFP_aa_pos|604;dbNSFP_aa_ref|V…	126923723
hg19	6	151936677	151936678	151936677	151936677	+	C6orf97	26	80129	V>L:Harmless 100%	80129	N/A	Q8IYT3	ENSG00000120262	chr6	151936677	151936678	80129	G	CCDS43515.1	Harmless 100%	5.81	3.09	N	0.996132	P	0.426683	C	0.977871	B	0.135	T	0.32	V>L	L	604	V	C	G	ENSG00000120262	80129	V>L:Harmless 100%	Q8IYT3	19	ID|80129;dbNSFP_Ancestral_allele|G;dbNSFP_CCDSid|CCDS43515.1;dbNSFP_GERP_NR|5.81;dbNSFP_GERP_RS|3.09;dbNSFP_LRT_pred|N;dbNSFP_LRT_score|0.996132;dbNSFP_MutTaster_pred|P;dbNSFP_MutTaster_score|0.426683;dbNSFP_PhyloP_pred|C;dbNSFP_PhyloP_score|0.977871;dbNSFP_Polyphen2_pred|B;dbNSFP_Polyphen2_score|0.135;dbNSFP_SIFT_pred|T;dbNSFP_SIFT_score|0.32;dbNSFP_aa_altref|L;dbNSFP_aa_pos|604;dbNSFP_aa_ref|V;…	126923725
hg19	6	151936677	151936678	151936677	151936677	+	C6orf97	26	80129	V>F:Unknown 25%	80129	N/A	Q8IYT3	ENSG00000120262	chr6	151936677	151936678	80129	G	CCDS43515.1	Unknown 25%	5.81	3.09	N	0.996132	P	0.857403	C	0.977871	P	0.419	T	0.93	V>F	F	604	V	T	G	ENSG00000120262	80129	V>F:Unknown 25%	Q8IYT3	19	ID|80129;dbNSFP_Ancestral_allele|G;dbNSFP_CCDSid|CCDS43515.1;dbNSFP_GERP_NR|5.81;dbNSFP_GERP_RS|3.09;dbNSFP_LRT_pred|N;dbNSFP_LRT_score|0.996132;dbNSFP_MutTaster_pred|P;dbNSFP_MutTaster_score|0.857403;dbNSFP_PhyloP_pred|C;dbNSFP_PhyloP_score|0.977871;dbNSFP_Polyphen2_pred|P;dbNSFP_Polyphen2_score|0.419;dbNSFP_SIFT_pred|T;dbNSFP_SIFT_score|0.93;dbNSFP_aa_altref|F;dbNSFP_aa_pos|604;dbNSFP_aa_ref|V;…	126923727
hg19	1	202183308	202183309	202183308	202183308	+	LGR6	26	59352	S>X:N/A	59352	N/A	Q9HBX8	ENSG00000133067	chr1	202183308	202183309	59352	T	CCDS30972.1	N/A	1.94	-3.88	NA	0.610561	NA	0.198829	N	0.007362	NA	0.266193	NA	0.731597	S>X	X	9	S	A	C	ENSG00000133067	59352	S>X:N/A	Q9HBX8	3	ID|59352;dbNSFP_Ancestral_allele|T;dbNSFP_CCDSid|CCDS30972.1;dbNSFP_GERP_NR|1.94;dbNSFP_GERP_RS|-3.88;dbNSFP_LRT_pred|NA;dbNSFP_LRT_score|0.610561;dbNSFP_MutTaster_pred|NA;dbNSFP_MutTaster_score|0.198829;dbNSFP_PhyloP_pred|N;dbNSFP_PhyloP_score|0.007362;dbNSFP_Polyphen2_pred|NA;dbNSFP_Polyphen2_score|0.266193;dbNSFP_SIFT_pred|NA;dbNSFP_SIFT_score|0.731597;dbNSFP_aa_altref|X;dbNSFP_aa_pos|9;dbNSFP…	13921467
hg19	1	202183308	202183309	202183308	202183308	+	LGR6	26	59352	S>X:N/A	59352	N/A	Q9HBX8	ENSG00000133067	chr1	202183308	202183309	59352	T	CCDS30972.1	N/A	1.94	-3.88	NA	0.610561	NA	0.198829	N	0.007362	NA	0.266193	NA	0.731597	S>X	X	9	S	G	C	ENSG00000133067	59352	S>X:N/A	Q9HBX8	3	ID|59352;dbNSFP_Ancestral_allele|T;dbNSFP_CCDSid|CCDS30972.1;dbNSFP_GERP_NR|1.94;dbNSFP_GERP_RS|-3.88;dbNSFP_LRT_pred|NA;dbNSFP_LRT_score|0.610561;dbNSFP_MutTaster_pred|NA;dbNSFP_MutTaster_score|0.198829;dbNSFP_PhyloP_pred|N;dbNSFP_PhyloP_score|0.007362;dbNSFP_Polyphen2_pred|NA;dbNSFP_Polyphen2_score|0.266193;dbNSFP_SIFT_pred|NA;dbNSFP_SIFT_score|0.731597;dbNSFP_aa_altref|X;dbNSFP_aa_pos|9;dbNSFP…	13921469
hg19	1	202183308	202183309	202183308	202183308	+	LGR6	26	59352	S>L:Probably deleterious 25%	59352	N/A	Q9HBX8	ENSG00000133067	chr1	202183308	202183309	59352	T	CCDS30972.1	Probably deleterious 25%	1.94	-3.88	NA	0.622234	NA	0.29135	N	0.007362	NA	0.438984	D	1	S>L	L	9	S	T	C	ENSG00000133067	59352	S>L:Probably deleterious 25%	Q9HBX8	3	ID|59352;dbNSFP_Ancestral_allele|T;dbNSFP_CCDSid|CCDS30972.1;dbNSFP_GERP_NR|1.94;dbNSFP_GERP_RS|-3.88;dbNSFP_LRT_pred|NA;dbNSFP_LRT_score|0.622234;dbNSFP_MutTaster_pred|NA;dbNSFP_MutTaster_score|0.29135;dbNSFP_PhyloP_pred|N;dbNSFP_PhyloP_score|0.007362;dbNSFP_Polyphen2_pred|NA;dbNSFP_Polyphen2_score|0.438984;dbNSFP_SIFT_pred|D;dbNSFP_SIFT_score|1.0;dbNSFP_aa_altref|L;dbNSFP_aa_pos|9;dbNSFP_aa_ref…	13921471
hg19	5	158204425	158204426	158204426	158204426	-	EBF1	26	1879	Y>S:Probably deleterious 50%	1879	N/A	Q9UH73	ENSG00000164330	chr5	158204425	158204426	1879	T	CCDS4343.1	Probably deleterious 50%	5.31	5.31	D	1	D	0.999357	C	0.998019	P	0.765	D	1	Y>S	S	344	Y	G	T	ENSG00000164330	1879	Y>S:Probably deleterious 50%	Q9UH73	7	ID|1879;dbNSFP_Ancestral_allele|T;dbNSFP_CCDSid|CCDS4343.1;dbNSFP_GERP_NR|5.31;dbNSFP_GERP_RS|5.31;dbNSFP_LRT_pred|D;dbNSFP_LRT_score|1.0;dbNSFP_MutTaster_pred|D;dbNSFP_MutTaster_score|0.999357;dbNSFP_PhyloP_pred|C;dbNSFP_PhyloP_score|0.998019;dbNSFP_Polyphen2_pred|P;dbNSFP_Polyphen2_score|0.765;dbNSFP_SIFT_pred|D;dbNSFP_SIFT_score|1.0;dbNSFP_aa_altref|S;dbNSFP_aa_pos|344;dbNSFP_aa_ref|Y;dbNSFP_a…	115683621
hg19	5	158204425	158204426	158204426	158204426	-	EBF1	26	1879	Y>C:Probably deleterious 75%	1879	N/A	Q9UH73	ENSG00000164330	chr5	158204425	158204426	1879	T	CCDS4343.1	Probably deleterious 75%	5.31	5.31	D	1	D	0.999836	C	0.998019	D	0.999	D	1	Y>C	C	344	Y	C	T	ENSG00000164330	1879	Y>C:Probably deleterious 75%	Q9UH73	7	ID|1879;dbNSFP_Ancestral_allele|T;dbNSFP_CCDSid|CCDS4343.1;dbNSFP_GERP_NR|5.31;dbNSFP_GERP_RS|5.31;dbNSFP_LRT_pred|D;dbNSFP_LRT_score|1.0;dbNSFP_MutTaster_pred|D;dbNSFP_MutTaster_score|0.999836;dbNSFP_PhyloP_pred|C;dbNSFP_PhyloP_score|0.998019;dbNSFP_Polyphen2_pred|D;dbNSFP_Polyphen2_score|0.999;dbNSFP_SIFT_pred|D;dbNSFP_SIFT_score|1.0;dbNSFP_aa_altref|C;dbNSFP_aa_pos|344;dbNSFP_aa_ref|Y;dbNSFP_a…	115683623
hg19	5	158204425	158204426	158204426	158204426	-	EBF1	26	1879	Y>F:Probably deleterious 75%	1879	N/A	Q9UH73	ENSG00000164330	chr5	158204425	158204426	1879	T	CCDS4343.1	Probably deleterious 75%	5.31	5.31	D	1	D	0.993579	C	0.998019	D	0.997	D	1	Y>F	F	344	Y	A	T	ENSG00000164330	1879	Y>F:Probably deleterious 75%	Q9UH73	7	ID|1879;dbNSFP_Ancestral_allele|T;dbNSFP_CCDSid|CCDS4343.1;dbNSFP_GERP_NR|5.31;dbNSFP_GERP_RS|5.31;dbNSFP_LRT_pred|D;dbNSFP_LRT_score|1.0;dbNSFP_MutTaster_pred|D;dbNSFP_MutTaster_score|0.993579;dbNSFP_PhyloP_pred|C;dbNSFP_PhyloP_score|0.998019;dbNSFP_Polyphen2_pred|D;dbNSFP_Polyphen2_score|0.997;dbNSFP_SIFT_pred|D;dbNSFP_SIFT_score|1.0;dbNSFP_aa_altref|F;dbNSFP_aa_pos|344;dbNSFP_aa_ref|Y;dbNSFP_a…	115683625
hg19	10	21827796	21827797	21827797	21827797	+	MLLT10	26	8028	W>R:Probably deleterious 75%	8028	N/A	P55197	ENSG00000078403	chr10	21827796	21827797	8028	T	CCDS7135.1	Probably deleterious 75%	5.18	5.18	D	1	D	0.980318	C	0.99772	D	1	D	1	W>R	R	66	W	A	T	ENSG00000078403	8028	W>R:Probably deleterious 75%	P55197	9	ID|8028;dbNSFP_Ancestral_allele|T;dbNSFP_CCDSid|CCDS7135.1;dbNSFP_GERP_NR|5.18;dbNSFP_GERP_RS|5.18;dbNSFP_LRT_pred|D;dbNSFP_LRT_score|1.0;dbNSFP_MutTaster_pred|D;dbNSFP_MutTaster_score|0.980318;dbNSFP_PhyloP_pred|C;dbNSFP_PhyloP_score|0.99772;dbNSFP_Polyphen2_pred|D;dbNSFP_Polyphen2_score|1.0;dbNSFP_SIFT_pred|D;dbNSFP_SIFT_score|1.0;dbNSFP_aa_altref|R;dbNSFP_aa_pos|66;dbNSFP_aa_ref|W;dbNSFP_altre…	17259511
hg19	10	21827796	21827797	21827797	21827797	+	MLLT10	26	8028	W>R:Probably deleterious 75%	8028	N/A	P55197	ENSG00000078403	chr10	21827796	21827797	8028	T	CCDS7135.1	Probably deleterious 75%	5.18	5.18	D	1	D	0.979301	C	0.99772	D	1	D	1	W>R	R	66	W	C	T	ENSG00000078403	8028	W>R:Probably deleterious 75%	P55197	9	ID|8028;dbNSFP_Ancestral_allele|T;dbNSFP_CCDSid|CCDS7135.1;dbNSFP_GERP_NR|5.18;dbNSFP_GERP_RS|5.18;dbNSFP_LRT_pred|D;dbNSFP_LRT_score|1.0;dbNSFP_MutTaster_pred|D;dbNSFP_MutTaster_score|0.979301;dbNSFP_PhyloP_pred|C;dbNSFP_PhyloP_score|0.99772;dbNSFP_Polyphen2_pred|D;dbNSFP_Polyphen2_score|1.0;dbNSFP_SIFT_pred|D;dbNSFP_SIFT_score|1.0;dbNSFP_aa_altref|R;dbNSFP_aa_pos|66;dbNSFP_aa_ref|W;dbNSFP_altre…	17259513
hg19	10	21827796	21827797	21827797	21827797	+	MLLT10	26	8028	W>G:Probably deleterious 75%	8028	N/A	P55197	ENSG00000078403	chr10	21827796	21827797	8028	T	CCDS7135.1	Probably deleterious 75%	5.18	5.18	D	1	D	0.994815	C	0.99772	D	1	D	1	W>G	G	66	W	G	T	ENSG00000078403	8028	W>G:Probably deleterious 75%	P55197	9	ID|8028;dbNSFP_Ancestral_allele|T;dbNSFP_CCDSid|CCDS7135.1;dbNSFP_GERP_NR|5.18;dbNSFP_GERP_RS|5.18;dbNSFP_LRT_pred|D;dbNSFP_LRT_score|1.0;dbNSFP_MutTaster_pred|D;dbNSFP_MutTaster_score|0.994815;dbNSFP_PhyloP_pred|C;dbNSFP_PhyloP_score|0.99772;dbNSFP_Polyphen2_pred|D;dbNSFP_Polyphen2_score|1.0;dbNSFP_SIFT_pred|D;dbNSFP_SIFT_score|1.0;dbNSFP_aa_altref|G;dbNSFP_aa_pos|66;dbNSFP_aa_ref|W;dbNSFP_altre…	17259515
hg19	1	114449662	114449663	114449662	114449662	+	DCLRE1B	26	64858	H>Q:Probably deleterious 50%	64858	N/A	Q9H816	ENSG00000118655	chr1	114449662	114449663	64858	T	CCDS866.1	Probably deleterious 50%	5.05	1.59	D	0.999926	P	0.971189	N	0.874983	D	0.92	T	0.72	H>Q	Q	78	H	A	T	ENSG00000118655	64858	H>Q:Probably deleterious 50%	Q9H816	14	ID|64858;dbNSFP_Ancestral_allele|T;dbNSFP_CCDSid|CCDS866.1;dbNSFP_GERP_NR|5.05;dbNSFP_GERP_RS|1.59;dbNSFP_LRT_pred|D;dbNSFP_LRT_score|0.999926;dbNSFP_MutTaster_pred|P;dbNSFP_MutTaster_score|0.971189;dbNSFP_PhyloP_pred|N;dbNSFP_PhyloP_score|0.874983;dbNSFP_Polyphen2_pred|D;dbNSFP_Polyphen2_score|0.92;dbNSFP_SIFT_pred|T;dbNSFP_SIFT_score|0.72;dbNSFP_aa_altref|Q;dbNSFP_aa_pos|78;dbNSFP_aa_ref|H;dbNS…	6013513
hg19	1	114449662	114449663	114449662	114449662	+	DCLRE1B	26	64858	H>Q:Probably deleterious 50%	64858	N/A	Q9H816	ENSG00000118655	chr1	114449662	114449663	64858	T	CCDS866.1	Probably deleterious 50%	5.05	1.59	D	0.999926	P	0.971189	N	0.874983	D	0.92	T	0.72	H>Q	Q	78	H	G	T	ENSG00000118655	64858	H>Q:Probably deleterious 50%	Q9H816	14	ID|64858;dbNSFP_Ancestral_allele|T;dbNSFP_CCDSid|CCDS866.1;dbNSFP_GERP_NR|5.05;dbNSFP_GERP_RS|1.59;dbNSFP_LRT_pred|D;dbNSFP_LRT_score|0.999926;dbNSFP_MutTaster_pred|P;dbNSFP_MutTaster_score|0.971189;dbNSFP_PhyloP_pred|N;dbNSFP_PhyloP_score|0.874983;dbNSFP_Polyphen2_pred|D;dbNSFP_Polyphen2_score|0.92;dbNSFP_SIFT_pred|T;dbNSFP_SIFT_score|0.72;dbNSFP_aa_altref|Q;dbNSFP_aa_pos|78;dbNSFP_aa_ref|H;dbNS…	6013515
hg19	11	65638719	65638720	65638720	65638720	-	EFEMP2	26	30008	H>P:Probably deleterious 50%	30008	N/A	O95967	ENSG00000172638	chr11	65638719	65638720	30008	T	CCDS8116.1	Probably deleterious 50%	4.44	4.44	D	0.999861	N	0.067112	C	0.997195	D	0.986	T	0.86	H>P	P	92	H	G	T	ENSG00000172638	30008	H>P:Probably deleterious 50%	O95967	16	ID|30008;dbNSFP_Ancestral_allele|T;dbNSFP_CCDSid|CCDS8116.1;dbNSFP_GERP_NR|4.44;dbNSFP_GERP_RS|4.44;dbNSFP_LRT_pred|D;dbNSFP_LRT_score|0.999861;dbNSFP_MutTaster_pred|N;dbNSFP_MutTaster_score|0.067112;dbNSFP_PhyloP_pred|C;dbNSFP_PhyloP_score|0.997195;dbNSFP_Polyphen2_pred|D;dbNSFP_Polyphen2_score|0.986;dbNSFP_SIFT_pred|T;dbNSFP_SIFT_score|0.86;dbNSFP_aa_altref|P;dbNSFP_aa_pos|92;dbNSFP_aa_ref|H;db…	25900275
hg19	11	65638719	65638720	65638720	65638720	-	EFEMP2	26	30008	H>R:Probably deleterious 50%	30008	N/A	O95967	ENSG00000172638	chr11	65638719	65638720	30008	T	CCDS8116.1	Probably deleterious 50%	4.44	4.44	D	0.999861	N	0.020836	C	0.997195	D	0.966	T	0.77	H>R	R	92	H	C	T	ENSG00000172638	30008	H>R:Probably deleterious 50%	O95967	16	ID|30008;dbNSFP_Ancestral_allele|T;dbNSFP_CCDSid|CCDS8116.1;dbNSFP_GERP_NR|4.44;dbNSFP_GERP_RS|4.44;dbNSFP_LRT_pred|D;dbNSFP_LRT_score|0.999861;dbNSFP_MutTaster_pred|N;dbNSFP_MutTaster_score|0.020836;dbNSFP_PhyloP_pred|C;dbNSFP_PhyloP_score|0.997195;dbNSFP_Polyphen2_pred|D;dbNSFP_Polyphen2_score|0.966;dbNSFP_SIFT_pred|T;dbNSFP_SIFT_score|0.77;dbNSFP_aa_altref|R;dbNSFP_aa_pos|92;dbNSFP_aa_ref|H;db…	25900277
hg19	11	65638719	65638720	65638720	65638720	-	EFEMP2	26	30008	H>L:Probably deleterious 50%	30008	N/A	O95967	ENSG00000172638	chr11	65638719	65638720	30008	T	CCDS8116.1	Probably deleterious 50%	4.44	4.44	D	0.999861	N	0.090586	C	0.997195	D	0.984	T	0.6	H>L	L	92	H	A	T	ENSG00000172638	30008	H>L:Probably deleterious 50%	O95967	16	ID|30008;dbNSFP_Ancestral_allele|T;dbNSFP_CCDSid|CCDS8116.1;dbNSFP_GERP_NR|4.44;dbNSFP_GERP_RS|4.44;dbNSFP_LRT_pred|D;dbNSFP_LRT_score|0.999861;dbNSFP_MutTaster_pred|N;dbNSFP_MutTaster_score|0.090586;dbNSFP_PhyloP_pred|C;dbNSFP_PhyloP_score|0.997195;dbNSFP_Polyphen2_pred|D;dbNSFP_Polyphen2_score|0.984;dbNSFP_SIFT_pred|T;dbNSFP_SIFT_score|0.6;dbNSFP_aa_altref|L;dbNSFP_aa_pos|92;dbNSFP_aa_ref|H;dbN…	25900279
hg19	11	65664346	65664347	65664346	65664346	-	FOSL1	26	8061	Q>H:Unknown 25%	8061	N/A	P15407	ENSG00000175592	chr11	65664346	65664347	8061	T	CCDS8121.1	Unknown 25%	4.61	1.05	N	0.996277	P	0.963388	N	0.792045	P	0.385	T	0.46	Q>H	H	77	Q	G	T	ENSG00000175592	8061	Q>H:Unknown 25%	P15407	17	ID|8061;dbNSFP_Ancestral_allele|T;dbNSFP_CCDSid|CCDS8121.1;dbNSFP_GERP_NR|4.61;dbNSFP_GERP_RS|1.05;dbNSFP_LRT_pred|N;dbNSFP_LRT_score|0.996277;dbNSFP_MutTaster_pred|P;dbNSFP_MutTaster_score|0.963388;dbNSFP_PhyloP_pred|N;dbNSFP_PhyloP_score|0.792045;dbNSFP_Polyphen2_pred|P;dbNSFP_Polyphen2_score|0.385;dbNSFP_SIFT_pred|T;dbNSFP_SIFT_score|0.46;dbNSFP_aa_altref|H;dbNSFP_aa_pos|77;dbNSFP_aa_ref|Q;dbN…	25924237
hg19	11	65664346	65664347	65664346	65664346	-	FOSL1	26	8061	Q>H:Unknown 25%	8061	N/A	P15407	ENSG00000175592	chr11	65664346	65664347	8061	T	CCDS8121.1	Unknown 25%	4.61	1.05	N	0.996277	P	0.963388	N	0.792045	P	0.385	T	0.46	Q>H	H	77	Q	A	T	ENSG00000175592	8061	Q>H:Unknown 25%	P15407	17	ID|8061;dbNSFP_Ancestral_allele|T;dbNSFP_CCDSid|CCDS8121.1;dbNSFP_GERP_NR|4.61;dbNSFP_GERP_RS|1.05;dbNSFP_LRT_pred|N;dbNSFP_LRT_score|0.996277;dbNSFP_MutTaster_pred|P;dbNSFP_MutTaster_score|0.963388;dbNSFP_PhyloP_pred|N;dbNSFP_PhyloP_score|0.792045;dbNSFP_Polyphen2_pred|P;dbNSFP_Polyphen2_score|0.385;dbNSFP_SIFT_pred|T;dbNSFP_SIFT_score|0.46;dbNSFP_aa_altref|H;dbNSFP_aa_pos|77;dbNSFP_aa_ref|Q;dbN…	25924239
hg19	11	65664346	65664347	65664347	65664347	-	FOSL1	26	8061	Q>P:Unknown 50%	8061	N/A	P15407	ENSG00000175592	chr11	65664346	65664347	8061	T	CCDS8121.1	Unknown 50%	4.61	1.78	N	0.996277	D	0.990828	N	0.861971	P	0.588	T	0.78	Q>P	P	77	Q	G	T	ENSG00000175592	8061	Q>P:Unknown 50%	P15407	17	ID|8061;dbNSFP_Ancestral_allele|T;dbNSFP_CCDSid|CCDS8121.1;dbNSFP_GERP_NR|4.61;dbNSFP_GERP_RS|1.78;dbNSFP_LRT_pred|N;dbNSFP_LRT_score|0.996277;dbNSFP_MutTaster_pred|D;dbNSFP_MutTaster_score|0.990828;dbNSFP_PhyloP_pred|N;dbNSFP_PhyloP_score|0.861971;dbNSFP_Polyphen2_pred|P;dbNSFP_Polyphen2_score|0.588;dbNSFP_SIFT_pred|T;dbNSFP_SIFT_score|0.78;dbNSFP_aa_altref|P;dbNSFP_aa_pos|77;dbNSFP_aa_ref|Q;dbN…	25924231
hg19	11	65664346	65664347	65664347	65664347	-	FOSL1	26	8061	Q>R:Unknown 50%	8061	N/A	P15407	ENSG00000175592	chr11	65664346	65664347	8061	T	CCDS8121.1	Unknown 50%	4.61	1.78	N	0.996277	D	0.825822	N	0.861971	P	0.25	T	0.63	Q>R	R	77	Q	C	T	ENSG00000175592	8061	Q>R:Unknown 50%	P15407	17	ID|8061;dbNSFP_Ancestral_allele|T;dbNSFP_CCDSid|CCDS8121.1;dbNSFP_GERP_NR|4.61;dbNSFP_GERP_RS|1.78;dbNSFP_LRT_pred|N;dbNSFP_LRT_score|0.996277;dbNSFP_MutTaster_pred|D;dbNSFP_MutTaster_score|0.825822;dbNSFP_PhyloP_pred|N;dbNSFP_PhyloP_score|0.861971;dbNSFP_Polyphen2_pred|P;dbNSFP_Polyphen2_score|0.25;dbNSFP_SIFT_pred|T;dbNSFP_SIFT_score|0.63;dbNSFP_aa_altref|R;dbNSFP_aa_pos|77;dbNSFP_aa_ref|Q;dbNS…	25924233
hg19	11	65664346	65664347	65664347	65664347	-	FOSL1	26	8061	Q>L:Unknown 50%	8061	N/A	P15407	ENSG00000175592	chr11	65664346	65664347	8061	T	CCDS8121.1	Unknown 50%	4.61	1.78	N	0.996277	D	0.978101	N	0.861971	P	0.588	T	0.33	Q>L	L	77	Q	A	T	ENSG00000175592	8061	Q>L:Unknown 50%	P15407	17	ID|8061;dbNSFP_Ancestral_allele|T;dbNSFP_CCDSid|CCDS8121.1;dbNSFP_GERP_NR|4.61;dbNSFP_GERP_RS|1.78;dbNSFP_LRT_pred|N;dbNSFP_LRT_score|0.996277;dbNSFP_MutTaster_pred|D;dbNSFP_MutTaster_score|0.978101;dbNSFP_PhyloP_pred|N;dbNSFP_PhyloP_score|0.861971;dbNSFP_Polyphen2_pred|P;dbNSFP_Polyphen2_score|0.588;dbNSFP_SIFT_pred|T;dbNSFP_SIFT_score|0.33;dbNSFP_aa_altref|L;dbNSFP_aa_pos|77;dbNSFP_aa_ref|Q;dbN…	25924235
hg19	6	151936677	151936678	151936678	151936678	+	C6orf97	26	80129	V>D:Probably deleterious 25%	80129	N/A	Q8IYT3	ENSG00000120262	chr6	151936677	151936678	80129	T	CCDS43515.1	Probably deleterious 25%	5.81	4.7	N	0.996132	D	0.922531	C	0.980322	B	0.004	D	0.99	V>D	D	604	V	A	T	ENSG00000120262	80129	V>D:Probably deleterious 25%	Q8IYT3	19	ID|80129;dbNSFP_Ancestral_allele|T;dbNSFP_CCDSid|CCDS43515.1;dbNSFP_GERP_NR|5.81;dbNSFP_GERP_RS|4.7;dbNSFP_LRT_pred|N;dbNSFP_LRT_score|0.996132;dbNSFP_MutTaster_pred|D;dbNSFP_MutTaster_score|0.922531;dbNSFP_PhyloP_pred|C;dbNSFP_PhyloP_score|0.980322;dbNSFP_Polyphen2_pred|B;dbNSFP_Polyphen2_score|0.0040;dbNSFP_SIFT_pred|D;dbNSFP_SIFT_score|0.99;dbNSFP_aa_altref|D;dbNSFP_aa_pos|604;dbNSFP_aa_ref|V;…	126923729
hg19	6	151936677	151936678	151936678	151936678	+	C6orf97	26	80129	V>A:Unknown 25%	80129	N/A	Q8IYT3	ENSG00000120262	chr6	151936677	151936678	80129	T	CCDS43515.1	Unknown 25%	5.81	4.7	N	0.996132	D	0.524112	C	0.980322	B	0.035	T	0.93	V>A	A	604	V	C	T	ENSG00000120262	80129	V>A:Unknown 25%	Q8IYT3	19	ID|80129;dbNSFP_Ancestral_allele|T;dbNSFP_CCDSid|CCDS43515.1;dbNSFP_GERP_NR|5.81;dbNSFP_GERP_RS|4.7;dbNSFP_LRT_pred|N;dbNSFP_LRT_score|0.996132;dbNSFP_MutTaster_pred|D;dbNSFP_MutTaster_score|0.524112;dbNSFP_PhyloP_pred|C;dbNSFP_PhyloP_score|0.980322;dbNSFP_Polyphen2_pred|B;dbNSFP_Polyphen2_score|0.035;dbNSFP_SIFT_pred|T;dbNSFP_SIFT_score|0.93;dbNSFP_aa_altref|A;dbNSFP_aa_pos|604;dbNSFP_aa_ref|V;d…	126923731
hg19	6	151936677	151936678	151936678	151936678	+	C6orf97	26	80129	V>G:Probably deleterious 25%	80129	N/A	Q8IYT3	ENSG00000120262	chr6	151936677	151936678	80129	T	CCDS43515.1	Probably deleterious 25%	5.81	4.7	N	0.996132	D	0.876736	C	0.980322	P	0.249	D	0.98	V>G	G	604	V	G	T	ENSG00000120262	80129	V>G:Probably deleterious 25%	Q8IYT3	19	ID|80129;dbNSFP_Ancestral_allele|T;dbNSFP_CCDSid|CCDS43515.1;dbNSFP_GERP_NR|5.81;dbNSFP_GERP_RS|4.7;dbNSFP_LRT_pred|N;dbNSFP_LRT_score|0.996132;dbNSFP_MutTaster_pred|D;dbNSFP_MutTaster_score|0.876736;dbNSFP_PhyloP_pred|C;dbNSFP_PhyloP_score|0.980322;dbNSFP_Polyphen2_pred|P;dbNSFP_Polyphen2_score|0.249;dbNSFP_SIFT_pred|D;dbNSFP_SIFT_score|0.98;dbNSFP_aa_altref|G;dbNSFP_aa_pos|604;dbNSFP_aa_ref|V;d…	126923733
