# Supplementary material for: Comprehensive Functional Annotation of Seventy-One Breast Cancer Risk Loci
Source: PLoS One. 2013 May 22;8(5):e63925. doi: 10.1371/journal.pone.0063925 (PMC3661550; doi:10.1371/journal.pone.0063925)
Supplement: Table S4 — FunciSNP results for TSS regional high LD SNPs. (XLS) [file pone.0063925.s010.xls]

## Sheet: Sheet1
Table S4. FunciSNP results for TSS regional high LD SNPs.
risk region #	chromosome	Number of Biofeatures	corr.snp.id	bio.feature	index.snp.id	R.squared	distance.from.index SNP	nearest.lincRNA.ID	nearest.TSS.GeneSymbol
18	5p12	1	rs10462083	TSS_region_HMEC_H3K4me2	rs4415084	0.727061	144222	TCONS_00009394	MRPS30
39	10p12.31	5	rs10828247	TSS_region_HMEC_H3K4me2	rs7072776	0.627719	-210086	TCONS_00018449	MLLT10
39	10p12.31	5	rs10828247	TSS_region_HMEC_H3K27Ac	rs7072776	0.627719	-210086	TCONS_00018449	MLLT10
39	10p12.31	5	rs10828247	TSS_region_HMEC_H3K4me3	rs7072776	0.627719	-210086	TCONS_00018449	MLLT10
39	10p12.31	5	rs10828247	TSS_region_HMEC_H3K9Ac	rs7072776	0.627719	-210086	TCONS_00018449	MLLT10
39	10p12.31	5	rs10828247	TSS_region_HMEC_Duke_DNaseI	rs7072776	0.627719	-210086	TCONS_00018449	MLLT10
39	10p12.31	4	rs10828248	TSS_region_HMEC_H3K4me3	rs7072776	0.666455	-208323	TCONS_00018449	MLLT10
39	10p12.31	4	rs10828248	TSS_region_HMEC_H3K4me2	rs7072776	0.666455	-208323	TCONS_00018449	MLLT10
39	10p12.31	4	rs10828248	TSS_region_HMEC_H3K27Ac	rs7072776	0.666455	-208323	TCONS_00018449	MLLT10
39	10p12.31	4	rs10828248	TSS_region_HMEC_H3K9Ac	rs7072776	0.666455	-208323	TCONS_00018449	MLLT10
39	10p12.31	4	rs10828249	TSS_region_HMEC_H3K4me3	rs7072776	0.659655	-208215	TCONS_00018449	MLLT10
39	10p12.31	4	rs10828249	TSS_region_HMEC_H3K4me2	rs7072776	0.659655	-208215	TCONS_00018449	MLLT10
39	10p12.31	4	rs10828249	TSS_region_HMEC_H3K27Ac	rs7072776	0.659655	-208215	TCONS_00018449	MLLT10
39	10p12.31	4	rs10828249	TSS_region_HMEC_H3K9Ac	rs7072776	0.659655	-208215	TCONS_00018449	MLLT10
47	11q13.1	3	rs10896064	TSS_region_HMEC_H3K4me2	rs3903072	0.702816	57967	TCONS_00019670	EFEMP2
47	11q13.1	3	rs10896064	TSS_region_HMEC_H3K4me3	rs3903072	0.702816	57967	TCONS_00019670	EFEMP2
47	11q13.1	3	rs10896064	TSS_region_HMEC_Duke_DNaseI	rs3903072	0.702816	57967	TCONS_00019670	EFEMP2
5	1q32.1	4	rs10920362	TSS_region_HMEC_Duke_DNaseI	rs6678914	0.759697	-3868	TCONS_00002217	LGR6
5	1q32.1	4	rs10920362	TSS_region_HMEC_H3K4me3	rs6678914	0.759697	-3868	TCONS_00002217	LGR6
5	1q32.1	4	rs10920362	TSS_region_HMEC_H3K4me2	rs6678914	0.759697	-3868	TCONS_00002217	LGR6
5	1q32.1	4	rs10920362	TSS_region_HMEC_Uw_Rep1_DNaseI	rs6678914	0.759697	-3868	TCONS_00002217	LGR6
39	10p12.31	1	rs11012730	TSS_region_HMEC_H3K4me2	rs7072776	0.558251	-221455	TCONS_00018449	MLLT10
2	1p13.2	1	rs11102701	TSS_region_HMEC_H3K4me2	rs11552449	0.907847	1440	TCONS_00000279	DCLRE1B
4	1q32.1	1	rs11240753	TSS_region_HMEC_HMM	rs4245739	0.737898	-43329	TCONS_00000114	MDM4
5	1q32.1	1	rs12129763	TSS_region_HMEC_H3K4me2	rs6678914	0.983786	-3145	TCONS_00002217	LGR6
39	10p12.31	4	rs12251016	TSS_region_HMEC_H3K4me3	rs7072776	0.663653	-211024	TCONS_00018449	MLLT10
39	10p12.31	4	rs12251016	TSS_region_HMEC_H3K9Ac	rs7072776	0.663653	-211024	TCONS_00018449	MLLT10
39	10p12.31	4	rs12251016	TSS_region_HMEC_H3K4me2	rs7072776	0.663653	-211024	TCONS_00018449	MLLT10
39	10p12.31	4	rs12251016	TSS_region_HMEC_H3K27Ac	rs7072776	0.663653	-211024	TCONS_00018449	MLLT10
39	10p12.31	1	rs12253527	TSS_region_HMEC_H3K4me2	rs7072776	0.716639	-213118	TCONS_00018449	MLLT10
39	10p12.31	3	rs12770228	TSS_region_HMEC_H3K4me2	rs7072776	0.569595	-249308	TCONS_00018449	C10orf114
39	10p12.31	3	rs12770228	TSS_region_HMEC_H3K9Ac	rs7072776	0.569595	-249308	TCONS_00018449	C10orf114
39	10p12.31	3	rs12770228	TSS_region_HMEC_H3K4me3	rs7072776	0.569595	-249308	TCONS_00018449	C10orf114
39	10p12.31	1	rs12779865	TSS_region_HMEC_H3K4me2	rs7072776	0.616904	-203780	TCONS_00018449	MLLT10
55	14q13.3	1	rs12883049	TSS_region_HMEC_HMM	rs2236007	0.819682	-708	TCONS_00022475	PAX9
63	17q23	4	rs12937360	TSS_region_HMEC_H3K9Ac	rs6504950	0.552923	-10173	TCONS_00025435	STXBP4
63	17q23	4	rs12937360	TSS_region_HMEC_H3K4me2	rs6504950	0.552923	-10173	TCONS_00025435	STXBP4
63	17q23	4	rs12937360	TSS_region_HMEC_H3K27Ac	rs6504950	0.552923	-10173	TCONS_00025435	STXBP4
63	17q23	4	rs12937360	TSS_region_HMEC_H3K4me3	rs6504950	0.552923	-10173	TCONS_00025435	STXBP4
50	12p11	4	rs141089797	TSS_region_HMEC_H3K4me3	rs10771399	0.502217	-31718	TCONS_00020365	PTHLH
50	12p11	4	rs141089797	TSS_region_HMEC_H3K27Ac	rs10771399	0.502217	-31718	TCONS_00020365	PTHLH
50	12p11	4	rs141089797	TSS_region_HMEC_H3K9Ac	rs10771399	0.502217	-31718	TCONS_00020365	PTHLH
50	12p11	4	rs141089797	TSS_region_HMEC_Duke_DNaseI	rs10771399	0.502217	-31718	TCONS_00020365	PTHLH
22	5q11.2	1	rs1466008	TSS_region_HMEC_H3K4me2	rs889312	0.5609	181522	TCONS_00009404	SETD9
67	19p13.11	4	rs172032	TSS_region_HMEC_H3K4me3	rs4808801	0.691945	62614	TCONS_00026930	ELL
67	19p13.11	4	rs172032	TSS_region_HMEC_H3K9Ac	rs4808801	0.691945	62614	TCONS_00026930	ELL
67	19p13.11	4	rs172032	TSS_region_HMEC_H3K27Ac	rs4808801	0.691945	62614	TCONS_00026930	ELL
67	19p13.11	4	rs172032	TSS_region_HMEC_H3K4me2	rs4808801	0.691945	62614	TCONS_00026930	ELL
63	17q23	1	rs17745344	TSS_region_HMEC_H3K4me2	rs6504950	0.993242	-8152	TCONS_00025435	STXBP4
39	10p12.31	1	rs1802669	TSS_region_HMEC_H3K4me2	rs7072776	0.667681	-205146	TCONS_00018449	MLLT10
18	5p12	7	rs1866406	TSS_region_HMEC_H3K9Ac	rs4415084	0.727061	147430	TCONS_00009394	MRPS30
18	5p12	7	rs1866406	TSS_region_HMEC_Uw_Rep2_DNaseI	rs4415084	0.727061	147430	TCONS_00009394	MRPS30
18	5p12	7	rs1866406	TSS_region_HMEC_H3K27Ac	rs4415084	0.727061	147430	TCONS_00009394	MRPS30
18	5p12	7	rs1866406	TSS_region_HMEC_Duke_DNaseI	rs4415084	0.727061	147430	TCONS_00009394	MRPS30
18	5p12	7	rs1866406	TSS_region_HMEC_Uw_Rep1_DNaseI	rs4415084	0.727061	147430	TCONS_00009394	MRPS30
18	5p12	7	rs1866406	TSS_region_HMEC_H3K4me3	rs4415084	0.727061	147430	TCONS_00009394	MRPS30
18	5p12	7	rs1866406	TSS_region_HMEC_H3K4me2	rs4415084	0.727061	147430	TCONS_00009394	MRPS30
22	5q11.2	1	rs192249	TSS_region_HMEC_H3K4me2	rs889312	0.59179	165630	TCONS_00009404	SETD9
22	5q11.2	1	rs194059	TSS_region_HMEC_H3K4me2	rs889312	0.59179	165532	TCONS_00009404	SETD9
8	2q31.1	2	rs2117131	TSS_region_HMEC_H3K4me2	rs1550623	0.738645	8993	TCONS_00004500	CDCA7
8	2q31.1	2	rs2117131	TSS_region_HMEC_H3K4me3	rs1550623	0.738645	8993	TCONS_00004500	CDCA7
67	19p13.11	2	rs2303696	TSS_region_HMEC_H3K4me3	rs4808801	0.806103	-22257	TCONS_00026930	ISYNA1
67	19p13.11	2	rs2303696	TSS_region_HMEC_H3K4me2	rs4808801	0.806103	-22257	TCONS_00026930	ISYNA1
67	19p13.11	1	rs2385089	TSS_region_HMEC_H3K4me2	rs4808801	0.883491	-20707	TCONS_00026930	ISYNA1
22	5q11.2	1	rs252913	TSS_region_HMEC_H3K4me2	rs889312	0.59179	163962	TCONS_00009404	SETD9
22	5q11.2	1	rs252914	TSS_region_HMEC_H3K4me2	rs889312	0.59179	166266	TCONS_00009404	SETD9
22	5q11.2	5	rs252923	TSS_region_HMEC_H3K9Ac	rs889312	0.574339	173778	TCONS_00009404	SETD9
22	5q11.2	5	rs252923	TSS_region_HMEC_H3K27Ac	rs889312	0.574339	173778	TCONS_00009404	SETD9
22	5q11.2	5	rs252923	TSS_region_HMEC_H3K4me3	rs889312	0.574339	173778	TCONS_00009404	SETD9
22	5q11.2	5	rs252923	TSS_region_HMEC_H3K4me2	rs889312	0.574339	173778	TCONS_00009404	SETD9
22	5q11.2	5	rs252923	TSS_region_HMEC_Duke_DNaseI	rs889312	0.574339	173778	TCONS_00009404	SETD9
22	5q11.2	3	rs252925	TSS_region_HMEC_H3K4me2	rs889312	0.59179	171889	TCONS_00009404	SETD9
22	5q11.2	3	rs252925	TSS_region_HMEC_H3K9Ac	rs889312	0.59179	171889	TCONS_00009404	SETD9
22	5q11.2	3	rs252925	TSS_region_HMEC_H3K4me3	rs889312	0.59179	171889	TCONS_00009404	SETD9
2	1p13.2	4	rs2797412	TSS_region_HMEC_H3K27Ac	rs11552449	0.519002	-145423	TCONS_00000279	PHTF1
2	1p13.2	4	rs2797412	TSS_region_HMEC_H3K4me2	rs11552449	0.519002	-145423	TCONS_00000279	PHTF1
2	1p13.2	4	rs2797412	TSS_region_HMEC_H3K4me3	rs11552449	0.519002	-145423	TCONS_00000279	PHTF1
2	1p13.2	4	rs2797412	TSS_region_HMEC_H3K9Ac	rs11552449	0.519002	-145423	TCONS_00000279	PHTF1
4	1q32.1	1	rs2926534	TSS_region_HMEC_HMM	rs4245739	0.993108	-54661	TCONS_00000114	PIK3C2B
4	1q32.1	1	rs3014606	TSS_region_HMEC_HMM	rs4245739	0.993108	-54692	TCONS_00000114	PIK3C2B
59	16q12.1	1	rs3095602	TSS_region_HMEC_Duke_DNaseI	rs3803662	0.987712	-5841	TCONS_00024415	TOX3
45	10q26.13	1	rs3135718	TSS_region_HMEC_H3K4me2	rs2981582	0.951879	1552	TCONS_00018061	FGFR2
22	5q11.2	1	rs331499	TSS_region_HMEC_H3K4me2	rs889312	0.5609	179039	TCONS_00009404	SETD9
22	5q11.2	1	rs33318	TSS_region_HMEC_H3K4me2	rs889312	0.5609	176530	TCONS_00009404	SETD9
39	10p12.31	2	rs34853448	TSS_region_HMEC_H3K4me2	rs7072776	0.553505	-223530	TCONS_00018449	MLLT10
39	10p12.31	2	rs34853448	TSS_region_HMEC_HMM	rs7072776	0.553505	-223530	TCONS_00018449	MLLT10
18	5p12	5	rs3747479	TSS_region_HMEC_H3K27Ac	rs4415084	0.727061	146647	TCONS_00009394	MRPS30
18	5p12	5	rs3747479	TSS_region_HMEC_H3K4me3	rs4415084	0.727061	146647	TCONS_00009394	MRPS30
18	5p12	5	rs3747479	TSS_region_HMEC_Duke_DNaseI	rs4415084	0.727061	146647	TCONS_00009394	MRPS30
18	5p12	5	rs3747479	TSS_region_HMEC_H3K9Ac	rs4415084	0.727061	146647	TCONS_00009394	MRPS30
18	5p12	5	rs3747479	TSS_region_HMEC_H3K4me2	rs4415084	0.727061	146647	TCONS_00009394	MRPS30
18	5p12	4	rs3761648	TSS_region_HMEC_H3K27Ac	rs4415084	0.727061	145564	TCONS_00009394	MRPS30
18	5p12	4	rs3761648	TSS_region_HMEC_H3K9Ac	rs4415084	0.727061	145564	TCONS_00009394	MRPS30
18	5p12	4	rs3761648	TSS_region_HMEC_H3K4me2	rs4415084	0.727061	145564	TCONS_00009394	MRPS30
18	5p12	4	rs3761648	TSS_region_HMEC_H3K4me3	rs4415084	0.727061	145564	TCONS_00009394	MRPS30
18	5p12	4	rs3761649	TSS_region_HMEC_H3K9Ac	rs4415084	0.727061	145649	TCONS_00009394	MRPS30
18	5p12	4	rs3761649	TSS_region_HMEC_H3K4me3	rs4415084	0.727061	145649	TCONS_00009394	MRPS30
18	5p12	4	rs3761649	TSS_region_HMEC_H3K4me2	rs4415084	0.727061	145649	TCONS_00009394	MRPS30
18	5p12	4	rs3761649	TSS_region_HMEC_H3K27Ac	rs4415084	0.727061	145649	TCONS_00009394	MRPS30
18	5p12	4	rs3761650	TSS_region_HMEC_H3K4me2	rs4415084	0.727061	145841	TCONS_00009394	MRPS30
18	5p12	4	rs3761650	TSS_region_HMEC_H3K27Ac	rs4415084	0.727061	145841	TCONS_00009394	MRPS30
18	5p12	4	rs3761650	TSS_region_HMEC_H3K9Ac	rs4415084	0.727061	145841	TCONS_00009394	MRPS30
18	5p12	4	rs3761650	TSS_region_HMEC_H3K4me3	rs4415084	0.727061	145841	TCONS_00009394	MRPS30
2	1p13.2	2	rs3761936	TSS_region_HMEC_H3K4me3	rs11552449	0.991531	1273	TCONS_00000279	DCLRE1B
2	1p13.2	2	rs3761936	TSS_region_HMEC_H3K4me2	rs11552449	0.991531	1273	TCONS_00000279	DCLRE1B
24	6p23	4	rs405447	TSS_region_HMEC_H3K9Ac	rs204247	0.952086	-9424	TCONS_00011269	RANBP9
24	6p23	4	rs405447	TSS_region_HMEC_H3K4me3	rs204247	0.952086	-9424	TCONS_00011269	RANBP9
24	6p23	4	rs405447	TSS_region_HMEC_H3K4me2	rs204247	0.952086	-9424	TCONS_00011269	RANBP9
24	6p23	4	rs405447	TSS_region_HMEC_H3K27Ac	rs204247	0.952086	-9424	TCONS_00011269	RANBP9
4	1q32.1	4	rs4245736	TSS_region_HMEC_H3K4me2	rs4245739	0.75568	-32637	TCONS_00000114	MDM4
4	1q32.1	4	rs4245736	TSS_region_HMEC_H3K27Ac	rs4245739	0.75568	-32637	TCONS_00000114	MDM4
4	1q32.1	4	rs4245736	TSS_region_HMEC_H3K4me3	rs4245739	0.75568	-32637	TCONS_00000114	MDM4
4	1q32.1	4	rs4245736	TSS_region_HMEC_H3K9Ac	rs4245739	0.75568	-32637	TCONS_00000114	MDM4
4	1q32.1	4	rs4245737	TSS_region_HMEC_H3K27Ac	rs4245739	0.728993	-32600	TCONS_00000114	MDM4
4	1q32.1	4	rs4245737	TSS_region_HMEC_H3K9Ac	rs4245739	0.728993	-32600	TCONS_00000114	MDM4
4	1q32.1	4	rs4245737	TSS_region_HMEC_H3K4me2	rs4245739	0.728993	-32600	TCONS_00000114	MDM4
4	1q32.1	4	rs4245737	TSS_region_HMEC_H3K4me3	rs4245739	0.728993	-32600	TCONS_00000114	MDM4
22	5q11.2	2	rs43183	TSS_region_HMEC_H3K27Ac	rs889312	0.564315	175908	TCONS_00009404	SETD9
22	5q11.2	2	rs43183	TSS_region_HMEC_H3K4me2	rs889312	0.564315	175908	TCONS_00009404	SETD9
4	1q32.1	1	rs4951075	TSS_region_HMEC_HMM	rs4245739	0.728993	-54396	TCONS_00000114	PIK3C2B
4	1q32.1	1	rs4951391	TSS_region_HMEC_H3K27Ac	rs4245739	0.808868	-34285	TCONS_00000114	MDM4
4	1q32.1	1	rs4951392	TSS_region_HMEC_H3K27Ac	rs4245739	0.92171	-34225	TCONS_00000114	MDM4
8	2q31.1	5	rs4972554	TSS_region_HMEC_Uw_Rep2_DNaseI	rs1550623	0.738645	8123	TCONS_00004500	CDCA7
8	2q31.1	5	rs4972554	TSS_region_HMEC_H3K4me2	rs1550623	0.738645	8123	TCONS_00004500	CDCA7
8	2q31.1	5	rs4972554	TSS_region_HMEC_HMM	rs1550623	0.738645	8123	TCONS_00004500	CDCA7
8	2q31.1	5	rs4972554	TSS_region_HMEC_Duke_DNaseI	rs1550623	0.738645	8123	TCONS_00004500	CDCA7
8	2q31.1	5	rs4972554	TSS_region_HMEC_H3K4me3	rs1550623	0.738645	8123	TCONS_00004500	CDCA7
39	10p12.31	2	rs5011832	TSS_region_HMEC_H3K4me3	rs7072776	0.551065	-250100	TCONS_00018449	C10orf114
39	10p12.31	2	rs5011832	TSS_region_HMEC_H3K4me2	rs7072776	0.551065	-250100	TCONS_00018449	C10orf114
16	4q24	6	rs62331150	TSS_region_HMEC_Uw_Rep1_DNaseI	rs9790517	0.97651	-15765	TCONS_00007807	TET2
16	4q24	6	rs62331150	TSS_region_HMEC_H3K4me3	rs9790517	0.97651	-15765	TCONS_00007807	TET2
16	4q24	6	rs62331150	TSS_region_HMEC_H3K4me2	rs9790517	0.97651	-15765	TCONS_00007807	TET2
16	4q24	6	rs62331150	TSS_region_HMEC_H3K9Ac	rs9790517	0.97651	-15765	TCONS_00007807	TET2
16	4q24	6	rs62331150	TSS_region_HMEC_Duke_DNaseI	rs9790517	0.97651	-15765	TCONS_00007807	TET2
16	4q24	6	rs62331150	TSS_region_HMEC_H3K27Ac	rs9790517	0.97651	-15765	TCONS_00007807	TET2
47	11q13.1	1	rs633800	TSS_region_HMEC_Duke_DNaseI	rs3903072	0.78109	55653	TCONS_00019670	EFEMP2
40	10p15.1	4	rs6602322	TSS_region_HMEC_H3K9Ac	rs2380205	0.526095	43845	TCONS_00018097	ANKRD16
40	10p15.1	4	rs6602322	TSS_region_HMEC_H3K4me2	rs2380205	0.526095	43845	TCONS_00018097	ANKRD16
40	10p15.1	4	rs6602322	TSS_region_HMEC_H3K27Ac	rs2380205	0.526095	43845	TCONS_00018097	ANKRD16
40	10p15.1	4	rs6602322	TSS_region_HMEC_H3K4me3	rs2380205	0.526095	43845	TCONS_00018097	ANKRD16
55	14q13.3	1	rs67155512	TSS_region_HMEC_HMM	rs2236007	0.983348	-16498	TCONS_00022475	PAX9
40	10p15.1	1	rs685852	TSS_region_HMEC_H3K4me2	rs2380205	0.533744	47883	TCONS_00018097	FBXO18
24	6p23	6	rs6905991	TSS_region_HMEC_H3K27Ac	rs204247	0.603773	-11244	TCONS_00011269	RANBP9
24	6p23	6	rs6905991	TSS_region_HMEC_Duke_DNaseI	rs204247	0.603773	-11244	TCONS_00011269	RANBP9
24	6p23	6	rs6905991	TSS_region_HMEC_H3K9Ac	rs204247	0.603773	-11244	TCONS_00011269	RANBP9
24	6p23	6	rs6905991	TSS_region_HMEC_H3K4me2	rs204247	0.603773	-11244	TCONS_00011269	RANBP9
24	6p23	6	rs6905991	TSS_region_HMEC_HMM	rs204247	0.603773	-11244	TCONS_00011269	RANBP9
24	6p23	6	rs6905991	TSS_region_HMEC_H3K4me3	rs204247	0.603773	-11244	TCONS_00011269	RANBP9
22	5q11.2	1	rs702691	TSS_region_HMEC_HMM	rs889312	0.598881	82642	TCONS_00009404	MAP3K1
63	17q23	4	rs7208403	TSS_region_HMEC_H3K4me2	rs6504950	0.552923	-9804	TCONS_00025435	STXBP4
63	17q23	4	rs7208403	TSS_region_HMEC_H3K4me3	rs6504950	0.552923	-9804	TCONS_00025435	STXBP4
63	17q23	4	rs7208403	TSS_region_HMEC_H3K9Ac	rs6504950	0.552923	-9804	TCONS_00025435	STXBP4
63	17q23	4	rs7208403	TSS_region_HMEC_H3K27Ac	rs6504950	0.552923	-9804	TCONS_00025435	STXBP4
63	17q23	3	rs7222197	TSS_region_HMEC_H3K9Ac	rs6504950	1	-8972	TCONS_00025435	STXBP4
63	17q23	3	rs7222197	TSS_region_HMEC_H3K4me3	rs6504950	1	-8972	TCONS_00025435	STXBP4
63	17q23	3	rs7222197	TSS_region_HMEC_H3K4me2	rs6504950	1	-8972	TCONS_00025435	STXBP4
63	17q23	4	rs7226272	TSS_region_HMEC_H3K27Ac	rs6504950	0.552923	-10024	TCONS_00025435	STXBP4
63	17q23	4	rs7226272	TSS_region_HMEC_H3K4me3	rs6504950	0.552923	-10024	TCONS_00025435	STXBP4
63	17q23	4	rs7226272	TSS_region_HMEC_H3K9Ac	rs6504950	0.552923	-10024	TCONS_00025435	STXBP4
63	17q23	4	rs7226272	TSS_region_HMEC_H3K4me2	rs6504950	0.552923	-10024	TCONS_00025435	STXBP4
55	14q13.3	1	rs72679711	TSS_region_HMEC_HMM	rs2236007	0.983348	-16488	TCONS_00022475	PAX9
27	6q25.1	1	rs7763637	TSS_region_HMEC_HMM	rs2046210	0.90873	946	TCONS_00011198	CCDC170
66	19p13.11	2	rs8100241	TSS_region_HMEC_H3K4me2	rs2363956	0.937259	-1230	TCONS_00026930	ANKLE1
66	19p13.11	2	rs8100241	TSS_region_HMEC_Duke_DNaseI	rs2363956	0.937259	-1230	TCONS_00026930	ANKLE1
66	19p13.11	3	rs8108174	TSS_region_HMEC_Duke_DNaseI	rs2363956	0.937259	-594	TCONS_00026930	ANKLE1
66	19p13.11	3	rs8108174	TSS_region_HMEC_H3K4me2	rs2363956	0.937259	-594	TCONS_00026930	ANKLE1
66	19p13.11	3	rs8108174	TSS_region_HMEC_H3K4me3	rs2363956	0.937259	-594	TCONS_00026930	ANKLE1
22	5q11.2	1	rs832533	TSS_region_HMEC_H3K4me2	rs889312	0.5609	183268	TCONS_00009404	SETD9
22	5q11.2	1	rs832534	TSS_region_HMEC_H3K4me2	rs889312	0.5609	181788	TCONS_00009404	SETD9
22	5q11.2	1	rs832535	TSS_region_HMEC_H3K4me2	rs889312	0.5609	181450	TCONS_00009404	SETD9
22	5q11.2	1	rs832536	TSS_region_HMEC_H3K4me2	rs889312	0.554109	180711	TCONS_00009404	SETD9
22	5q11.2	1	rs832540	TSS_region_HMEC_H3K4me2	rs889312	0.59179	167318	TCONS_00009404	SETD9
22	5q11.2	1	rs832552	TSS_region_HMEC_HMM	rs889312	0.612976	81966	TCONS_00009404	MAP3K1
8	2q31.1	4	rs930313	TSS_region_HMEC_H3K9Ac	rs1550623	0.979283	6224	TCONS_00004500	CDCA7
8	2q31.1	4	rs930313	TSS_region_HMEC_H3K27Ac	rs1550623	0.979283	6224	TCONS_00004500	CDCA7
8	2q31.1	4	rs930313	TSS_region_HMEC_H3K4me2	rs1550623	0.979283	6224	TCONS_00004500	CDCA7
8	2q31.1	4	rs930313	TSS_region_HMEC_H3K4me3	rs1550623	0.979283	6224	TCONS_00004500	CDCA7
63	17q23	1	rs9895808	TSS_region_HMEC_H3K4me2	rs6504950	1	-8029	TCONS_00025435	STXBP4
63	17q23	3	rs9915183	TSS_region_HMEC_H3K4me3	rs6504950	1	-9334	TCONS_00025435	STXBP4
63	17q23	3	rs9915183	TSS_region_HMEC_H3K9Ac	rs6504950	1	-9334	TCONS_00025435	STXBP4
63	17q23	3	rs9915183	TSS_region_HMEC_H3K4me2	rs6504950	1	-9334	TCONS_00025435	STXBP4
