# Supplementary material for: Comprehensive Functional Annotation of Seventy-One Breast Cancer Risk Loci
Source: PLoS One. 2013 May 22;8(5):e63925. doi: 10.1371/journal.pone.0063925 (PMC3661550; doi:10.1371/journal.pone.0063925)
Supplement: Table S5 — Differential expression analysis of the genes, which high LD TSS regional SNPs reside in. (XLS) [file pone.0063925.s011.xls]

## Sheet: 76TSSregionalSNP_nearest24FIN
Table S5. Differential expression analysis of the genes, which high LD TSS regional SNPs reside in.
Gene name	dataset name used from Oncomine	Comparison	Fold change	P-value	References
MLLT10	Finak Breast	Invasive Breast Carcinoma Stroma vs. Normal	-2.577	2.52e-18	Finak et al: Stromal gene expression predicts clinical outcome in breast cancer. Nature medicine 2008, 14:518-527.
EFEMP2	Richardson Breast 2	Ductal Breast Carcinoma vs. Normal	-2.712	3.19e-08	Richardson et al: X chromosomal abnormalities in basal-like human breast cancer. Cancer cell 2006, 9:121-132.
LGR6	Ma Breast 4	Invasive Breast Carcinoma Stroma vs. Normal	-3.97	3.54e-06	Ma et al: Gene expression profiling of the tumor microenvironment during breast cancer progression. Breast cancer research : BCR 2009, 11:R7.
LGR6	Ma Breast 4	Invasive Ductal Breast Carcinoma Epithelia vs. Normal	-2.991	1.39e-05	Ma et al: Gene expression profiling of the tumor microenvironment during breast cancer progression. Breast cancer research : BCR 2009, 11:R7.
LGR6	Ma Breast 4	Ductal Breast Carcinoma in situ Epithelia vs. Normal	-3.212	3.96e-05	Ma et al: Gene expression profiling of the tumor microenvironment during breast cancer progression. Breast cancer research : BCR 2009, 11:R7.
LGR6	TCGA Breast	Invasive Lobular Breast Carcinoma vs. Normal	-5.796	2.54e-09	Comprehensive molecular portraits of human breast tumours. Nature 2012, 490:61-70.
LGR6	TCGA Breast	Invasive Breast Carcinoma vs. Normal	-4.484	4.27e-12	Comprehensive molecular portraits of human breast tumours. Nature 2012, 490:61-70.
PAX9	TCGA Breast	Invasive Ductal and Lobular Breast Carcinoma vs. Normal	2.363	6.33e-08	Comprehensive molecular portraits of human breast tumours. Nature 2012, 490:61-70.
PAX9	TCGA Breast	Invasive Lobular Breast Carcinoma vs. Normal	4.002	1.69e-13	Comprehensive molecular portraits of human breast tumours. Nature 2012, 490:61-70.
CDCA7	Finak Breast	Invasive Breast Carcinoma Stroma vs. Normal	-17.312	2.6e-22	Finak et al: Stromal gene expression predicts clinical outcome in breast cancer. Nature medicine 2008, 14:518-527.
ISYNA1	Finak Breast	Invasive Breast Carcinoma Stroma vs. Normal	-5.773	1.87e-19	Finak et al: Stromal gene expression predicts clinical outcome in breast cancer. Nature medicine 2008, 14:518-527.
TOX3	TCGA Breast	Invasive Ductal and Lobular Breast Carcinoma vs. Normal	3.42	1.03e-11	Comprehensive molecular portraits of human breast tumours. Nature 2012, 490:61-70.
TOX3	TCGA Breast	Intraductal Cribriform Breast Adenocarcinoma vs. Normal	2.858	3.28e-11	Comprehensive molecular portraits of human breast tumours. Nature 2012, 490:61-70.
TOX3	TCGA Breast	Mixed Lobular and Ductal Breast Carcinoma vs. Normal	3.838	5.31e-06	Comprehensive molecular portraits of human breast tumours. Nature 2012, 490:61-70.
FGFR2	Sorlie Breast 2	Ductal Breast Carcinoma vs. Normal	-2.106	3.54e-09	Sorlie et al: Repeated observation of breast tumor subtypes in independent gene expression data sets. PNAS 2003, 100:8418-8423.
RANBP9	Finak Breast	Invasive Breast Carcinoma Stroma vs. Normal	-18.405	3.07e-19	Finak et al: Stromal gene expression predicts clinical outcome in breast cancer. Nature medicine 2008, 14:518-527.
TET2	Radvanyi Breast	Invasive Ductal Breast Carcinoma vs. Normal	-2.208	3.8e-05	Radvanyi et al: The gene associated with trichorhinophalangeal syndrome in humans is overexpressed in breast cancer. PNAS 2005, 102:11005-11010.
TET2	Finak Breast	Invasive Breast Carcinoma Stroma vs. Normal	2.444	5.22e-12	Finak et al: Stromal gene expression predicts clinical outcome in breast cancer. Nature medicine 2008, 14:518-527.
ANKRD16	TCGA Breast	Invasive Ductal and Lobular Carcinoma vs. Normal	2.163	4.13e-21	Comprehensive molecular portraits of human breast tumours. Nature 2012, 490:61-70.
MAP3K1	Richardson Breast 2	Ductal Breast Carcinoma vs. Normal	-2.511	1.15e-05	Richardson et al: X chromosomal abnormalities in basal-like human breast cancer. Cancer cell 2006, 9:121-132.
C6orf97	TCGA Breast	Intraductal Cribriform Breast Adenocarcinoma vs. Normal	2.834	3.1e-21	Comprehensive molecular portraits of human breast tumours. Nature 2012, 490:61-70.
