# Supplementary material for: Comprehensive Functional Annotation of Seventy-One Breast Cancer Risk Loci
Source: PLoS One. 2013 May 22;8(5):e63925. doi: 10.1371/journal.pone.0063925 (PMC3661550; doi:10.1371/journal.pone.0063925)
Supplement: Table S6 — TSS regional high LD SNP motif analysis result. (XLS) [file pone.0063925.s012.xls]

## Sheet: Sheet1
Table S6. TSS regional high LD SNP motif analysis result
corr.snp.id	chr	feature_start	feature_end	feature	score	database
rs8108174	chr19	17393530	17393538	SCL/HPC7-Scl-ChIP-Seq/Homer	5.63846	FindMotif_ChIP-Seq
rs3761650	chr5	44808349	44808361	TATA-Box(TBP)/Promoter/Homer	5.84235	FindMotif_ChIP-Seq
rs4972554	chr2	174221008	174221023	PR(NR)/T47D-PR-ChIP-Seq(GSE31130)/Homer	6.32266	FindMotif_ChIP-Seq
rs8108174	chr19	17393527	17393535	SCL/HPC7-Scl-ChIP-Seq/Homer	6.47736	FindMotif_ChIP-Seq
rs43183	chr5	56207784	56207792	Smad3(MAD)/NPC-Smad3-ChIP-Seq(GSE36673)/Homer	6.58063	FindMotif_ChIP-Seq
rs12770228	chr10	21783627	21783639	EBF1(EBF)/Near-E2A-ChIP-Seq/Homer	6.7918	FindMotif_ChIP-Seq
rs3761649	chr5	44808160	44808172	TATA-Box(TBP)/Promoter/Homer	6.85511	FindMotif_ChIP-Seq
rs43183	chr5	56207782	56207792	Smad4(MAD)/ESC-SMAD4-ChIP-Seq(GSE29422)/Homer	7.04595	FindMotif_ChIP-Seq
rs43183	chr5	56207784	56207792	Smad2(MAD)/ES-SMAD2-ChIP-Seq(GSE29422)/Homer	7.18933	FindMotif_ChIP-Seq
rs8108174	chr19	17393527	17393539	MyoD(HLH)/Myotube-MyoD-ChIP-Seq/Homer	7.34401	FindMotif_ChIP-Seq
rs34853448	chr10	21809410	21809418	Maz(Zf)/HepG2-Maz-ChIP-Seq(GSE31477)/Homer	7.47877	FindMotif_ChIP-Seq
rs62331150	chr4	106069011	106069019	Maz(Zf)/HepG2-Maz-ChIP-Seq(GSE31477)/Homer	7.47877	FindMotif_ChIP-Seq
rs10896064	chr11	65641026	65641034	NF1-halfsite(CTF)/LNCaP-NF1-ChIP-Seq/Homer	7.74675	FindMotif_ChIP-Seq
rs34853448	chr10	21809409	21809417	Maz(Zf)/HepG2-Maz-ChIP-Seq(GSE31477)/Homer	7.7752	FindMotif_ChIP-Seq
rs62331150	chr4	106069006	106069014	Maz(Zf)/HepG2-Maz-ChIP-Seq(GSE31477)/Homer	8.22718	FindMotif_ChIP-Seq
rs3747479	chr5	44809160	44809168	NF1-halfsite(CTF)/LNCaP-NF1-ChIP-Seq/Homer	8.3123	FindMotif_ChIP-Seq
rs12779865	chr10	21829155	21829165	Mef2a(MADS)/HL1-Mef2a.biotin-ChIP-Seq/Homer/	8.40961	FindMotif_ChIP-Seq
rs62331150	chr4	106069005	106069013	Maz(Zf)/HepG2-Maz-ChIP-Seq(GSE31477)/Homer	8.73681	FindMotif_ChIP-Seq
rs405447	chr6	13713091	13713101	Oct4(POU/Homeobox)/mES-Oct4-ChIP-Seq/Homer	9.15417	FindMotif_ChIP-Seq
rs405447	chr6	13713097	13713107	Oct2(POU/Homeobox)/Bcell-Oct2-ChIP-Seq/Homer	9.32451	FindMotif_ChIP-Seq
rs62331150	chr4	106069005	106069019	UF1H3BETA	-12	Haploreg
rs17745344	chr17	53048309	53048325	Foxl1_1	-3.4	Haploreg
rs685852	chr10	5934608	5934624	Mef2_5	-2.6	Haploreg
rs405447	chr6	13713102	13713088	Pou2f1_5	-2.3	Haploreg
rs10828247	chr10	21822852	21822867	Zfp281	-1.6	Haploreg
rs12779865	chr10	21829158	21829179	HNF1_7	-1.3	Haploreg
rs62331150	chr4	106069008	106069018	Sp1_4	-1.1	Haploreg
rs12251016	chr10	21821919	21821904	MafK	-0.6	Haploreg
rs331499	chr5	56210937	56210920	Eomes	-0.2	Haploreg
rs5011832	chr10	21782826	21782843	CDP_6	0.1	Haploreg
rs8108174	chr19	17393541	17393524	Ascl2	0.1	Haploreg
rs62331150	chr4	106068997	106069010	Sp1_3	0.2	Haploreg
rs3135718	chr10	123353883	123353868	Hic1_3	0.5	Haploreg
rs252923	chr5	56205665	56205650	AP-2_6	0.8	Haploreg
rs331499	chr5	56210935	56210923	TBX5_1	0.8	Haploreg
rs252923	chr5	56205665	56205651	AP-2_5	1	Haploreg
rs685852	chr10	5934607	5934625	Mef2_6	1	Haploreg
rs832534	chr5	56213655	56213672	LXR_3	1	Haploreg
rs10828249	chr10	21824724	21824747	HMG-IY_2	1.1	Haploreg
rs2797412	chr1	114302961	114302974	CEBPG	1.3	Haploreg
rs252923	chr5	56205649	56205664	AP-2_7	1.5	Haploreg
rs685852	chr10	5934607	5934623	Mef2_3	1.6	Haploreg
rs685852	chr10	5934609	5934625	Mef2_1	1.6	Haploreg
rs9915183	chr17	53047154	53047137	Six_2	1.9	Haploreg
rs10828247	chr10	21822870	21822856	KROX	2.3	Haploreg
rs62331150	chr4	106069003	106069017	Egr_3	2.5	Haploreg
rs11012730	chr10	21811481	21811492	Pou6f1_1	2.7	Haploreg
rs34853448	chr10	21809412	21809398	KROX	5.1	Haploreg
rs62331150	chr4	106069021	106069004	Sp4	5.1	Haploreg
rs62331150	chr4	106069003	106069017	KROX	5.7	Haploreg
rs331499	chr5	56210945	56210921	Brachyury_1	9	Haploreg
rs2385089	chr19	18550428	18550440	Sox_7	<-1.4	Haploreg
rs62331150	chr4	106069008	106069017	CAC-binding-protein	<-1.8	Haploreg
rs62331150	chr4	106069020	106069004	Zfp740	<-2.2	Haploreg
rs12770228	chr10	21783625	21783639	Zic_4	<-2.5	Haploreg
rs2385089	chr19	18550426	18550443	Sox_13	<-2.7	Haploreg
rs832552	chr5	56113839	56113865	AIRE_1	<-3.1	Haploreg
rs832534	chr5	56213688	56213670	AP-4_1	<-4.5	Haploreg
rs405447	chr6	13713092	13713110	Pou2f1_1	<-6	Haploreg
rs405447	chr6	13713095	13713107	Pou2f1_8	<-7.9	Haploreg
rs10462083	chr5	44806744	44806730	CEBPB_2	>1.5	Haploreg
rs33318	chr5	56208421	56208409	NF-AT	>1.8	Haploreg
rs9895808	chr17	53048451	53048437	CEBPB_2	>1.9	Haploreg
rs12937360	chr17	53046310	53046298	GATA_10	>2.5	Haploreg
rs8108174	chr19	17393522	17393540	Myf_3	>2.6	Haploreg
rs7208403	chr17	53046656	53046670	Irf_10	>3	Haploreg
rs832552	chr5	56113835	56113853	NR3C_9	>3.1	Haploreg
rs7208403	chr17	53046656	53046671	Irf_7	>3.3	Haploreg
rs3747479	chr5	44809168	44809156	GLI	>3.5	Haploreg
rs7208403	chr17	53046656	53046670	Irf_6	>3.7	Haploreg
rs7208403	chr17	53046657	53046670	Irf_3	>3.7	Haploreg
rs8108174	chr19	17393538	17393526	HEN1_2	>4.2	Haploreg
rs702691	chr5	56114539	56114515	COMP1	>5.4	Haploreg
rs8108174	chr19	17393538	17393526	Myf_1	>8.4	Haploreg
rs8108174	chr19	17393534	17393523	Myf	8.77587	JASPARCORE2009
rs8108174	chr19	17393537	17393526	Myf	8.77587	JASPARCORE2009
rs12883049	chr14	37132057	37132068	Myf	9.34656	JASPARCORE2009
rs8108174	chr19	17393537	17393526	NHLH1	9.82053	JASPARCORE2009
rs4951392	chr1	204484617	204484624	HOXA5	10.4631	JASPARCORE2009
rs252923	chr5	56205660	56205667	Mafb	10.5409	JASPARCORE2009
rs72679711	chr14	37116284	37116275	SP1	10.926	JASPARCORE2009
rs141089797	chr12	28123358	28123366	TFAP2A	10.9905	JASPARCORE2009
rs62331150	chr4	106069010	106069019	SP1	11.2221	JASPARCORE2009
rs62331150	chr4	106069006	106069015	MZF1_5-13	11.2621	JASPARCORE2009
rs7208403	chr17	53046665	53046674	MAX	11.3473	JASPARCORE2009
rs12770228	chr10	21783628	21783637	EBF1	11.3938	JASPARCORE2009
rs67155512	chr14	37116269	37116278	EBF1	11.3938	JASPARCORE2009
rs2303696	chr19	18548881	18548890	SP1	11.458	JASPARCORE2009
rs12770228	chr10	21783633	21783642	SP1	11.5626	JASPARCORE2009
rs405447	chr6	13713092	13713106	Pou5f1	11.958	JASPARCORE2009
rs405447	chr6	13713105	13713091	Pou5f1	11.958	JASPARCORE2009
rs141089797	chr12	28123362	28123353	NF-kappaB	12.1024	JASPARCORE2009
rs12770228	chr10	21783634	21783643	Klf4	12.1799	JASPARCORE2009
rs3095602	chr16	52580499	52580508	MZF1_5-13	12.204	JASPARCORE2009
rs62331150	chr4	106069010	106069019	Klf4	12.3751	JASPARCORE2009
rs2303696	chr19	18548889	18548880	SP1	12.4991	JASPARCORE2009
rs4951392	chr1	204484617	204484608	SP1	12.4991	JASPARCORE2009
rs141089797	chr12	28123353	28123363	NFKB1	12.6329	JASPARCORE2009
rs34853448	chr10	21809415	21809405	Egr1	12.7278	JASPARCORE2009
rs832533	chr5	56215155	56215144	IRF1	13.8327	JASPARCORE2009
rs34853448	chr10	21809403	21809412	SP1	14.3307	JASPARCORE2009
rs62331150	chr4	106069018	106069009	SP1	14.3307	JASPARCORE2009
rs3014606	chr1	204464147	204464158	c-Myc	0.785	Transfac_ChIPSite
rs3747479	chr5	44809156	44809175	YY1	0.902	Transfac_ChIPSite
rs10828247	chr10	21822856	21822863	E2F-6	0.995	Transfac_ChIPSite
