# Supplementary material for: Comprehensive Functional Annotation of Seventy-One Breast Cancer Risk Loci
Source: PLoS One. 2013 May 22;8(5):e63925. doi: 10.1371/journal.pone.0063925 (PMC3661550; doi:10.1371/journal.pone.0063925)
Supplement: Table S12 — high LD SNPs in enhancer motif analysis result. (XLS) [file pone.0063925.s018.xls]

## Sheet: Sheet
Table S12. high LD SNPs in enhancer motif analysis result.
corr.snp.id	chr	feature_start	feature_end	feature	score	database
rs12487185	chr3	30677265	30677275	Nanog(Homeobox)/mES-Nanog-ChIP-Seq/Homer	5.07767	FindMotif_ChIP-Seq
rs10843056	chr12	28172145	28172155	Eomes(T-box)/H9-Eomes-ChIP-Seq/Homer	5.08934	FindMotif_ChIP-Seq
rs13356086	chr5	44887672	44887680	SCL/HPC7-Scl-ChIP-Seq/Homer	5.10148	FindMotif_ChIP-Seq
rs11049290	chr12	28174676	28174684	MYB(HTH)/ERMYB-Myb-ChIPSeq(GSE22095)/Homer	5.1351	FindMotif_ChIP-Seq
rs73169091	chr22	41026013	41026023	Nanog(Homeobox)/mES-Nanog-ChIP-Seq/Homer	5.14441	FindMotif_ChIP-Seq
rs1121980	chr16	53809245	53809255	Eomes(T-box)/H9-Eomes-ChIP-Seq/Homer	5.16444	FindMotif_ChIP-Seq
rs7460048	chr8	29515831	29515839	SCL/HPC7-Scl-ChIP-Seq/Homer	5.17219	FindMotif_ChIP-Seq
rs6999897	chr8	129192700	129192710	Eomes(T-box)/H9-Eomes-ChIP-Seq/Homer	5.19526	FindMotif_ChIP-Seq
rs17828907	chr14	69011202	69011210	SCL/HPC7-Scl-ChIP-Seq/Homer	5.2044	FindMotif_ChIP-Seq
rs7465364	chr8	29505164	29505172	SCL/HPC7-Scl-ChIP-Seq/Homer	5.21078	FindMotif_ChIP-Seq
rs8058930	chr16	53860661	53860669	SCL/HPC7-Scl-ChIP-Seq/Homer	5.21078	FindMotif_ChIP-Seq
rs8060823	chr16	53860661	53860669	SCL/HPC7-Scl-ChIP-Seq/Homer	5.21078	FindMotif_ChIP-Seq
rs13081020	chr3	30687969	30687977	SCL/HPC7-Scl-ChIP-Seq/Homer	5.22696	FindMotif_ChIP-Seq
rs73169051	chr22	40979640	40979648	SCL/HPC7-Scl-ChIP-Seq/Homer	5.22696	FindMotif_ChIP-Seq
rs7459709	chr8	29504990	29504998	SCL/HPC7-Scl-ChIP-Seq/Homer	5.22696	FindMotif_ChIP-Seq
rs4732698	chr8	29519976	29519986	Eomes(T-box)/H9-Eomes-ChIP-Seq/Homer	5.2752	FindMotif_ChIP-Seq
rs424001	chr6	13715991	13716001	Nanog(Homeobox)/mES-Nanog-ChIP-Seq/Homer	5.27596	FindMotif_ChIP-Seq
rs13249993	chr8	128350514	128350522	SCL/HPC7-Scl-ChIP-Seq/Homer	5.3223	FindMotif_ChIP-Seq
rs56103707	chr19	44304187	44304195	SCL/HPC7-Scl-ChIP-Seq/Homer	5.32651	FindMotif_ChIP-Seq
rs34575776	chr1	10621053	10621061	CRX(Homeobox)/Retina-Crx-ChIP-Seq/Homer	5.32795	FindMotif_ChIP-Seq
rs62033403	chr16	53822234	53822242	SCL/HPC7-Scl-ChIP-Seq/Homer	5.33716	FindMotif_ChIP-Seq
rs62033404	chr16	53822234	53822242	SCL/HPC7-Scl-ChIP-Seq/Homer	5.33716	FindMotif_ChIP-Seq
rs689274	chr11	65665987	65665997	Eomes(T-box)/H9-Eomes-ChIP-Seq/Homer	5.37364	FindMotif_ChIP-Seq
rs35270244	chr1	204548411	204548419	SCL/HPC7-Scl-ChIP-Seq/Homer	5.42943	FindMotif_ChIP-Seq
rs10087810	chr8	128352728	128352736	Tbx5(T-box)/HL1-Tbx5.biotin-ChIP-Seq/Homer	5.43425	FindMotif_ChIP-Seq
rs7254249	chr19	18591744	18591752	SCL/HPC7-Scl-ChIP-Seq/Homer	5.47515	FindMotif_ChIP-Seq
rs11628293	chr14	69037317	69037325	SCL/HPC7-Scl-ChIP-Seq/Homer	5.48425	FindMotif_ChIP-Seq
rs12158872	chr22	40832501	40832509	SCL/HPC7-Scl-ChIP-Seq/Homer	5.48425	FindMotif_ChIP-Seq
rs7957915	chr12	28180499	28180507	SCL/HPC7-Scl-ChIP-Seq/Homer	5.52981	FindMotif_ChIP-Seq
rs10843056	chr12	28172142	28172150	SCL/HPC7-Scl-ChIP-Seq/Homer	5.53289	FindMotif_ChIP-Seq
rs1270113	chr12	28145421	28145429	SCL/HPC7-Scl-ChIP-Seq/Homer	5.53891	FindMotif_ChIP-Seq
rs4871782	chr8	128352230	128352240	Eomes(T-box)/H9-Eomes-ChIP-Seq/Homer	5.55081	FindMotif_ChIP-Seq
rs788463	chr12	28152645	28152653	Tbx5(T-box)/HL1-Tbx5.biotin-ChIP-Seq/Homer	5.57566	FindMotif_ChIP-Seq
rs11684853	chr2	19310917	19310927	Lhx3(Homeobox)/Forebrain-p300-ChIP-Seq/Homer	5.58337	FindMotif_ChIP-Seq
rs34771216	chr3	30683026	30683034	CRX(Homeobox)/Retina-Crx-ChIP-Seq/Homer	5.60572	FindMotif_ChIP-Seq
rs6734808	chr2	218294568	218294578	Nkx3.1(Homeobox)/LNCaP-Nkx3.1-ChIP-Seq(GSE28264)/Homer	5.62989	FindMotif_ChIP-Seq
rs113583947	chr14	69041066	69041074	Tbx5(T-box)/HL1-Tbx5.biotin-ChIP-Seq/Homer	5.63467	FindMotif_ChIP-Seq
rs6585200	chr10	114768605	114768613	CRX(Homeobox)/Retina-Crx-ChIP-Seq/Homer	5.65038	FindMotif_ChIP-Seq
rs56103707	chr19	44304184	44304192	Tbx5(T-box)/HL1-Tbx5.biotin-ChIP-Seq/Homer	5.68674	FindMotif_ChIP-Seq
rs11684853	chr2	19310910	19310920	Lhx3(Homeobox)/Forebrain-p300-ChIP-Seq/Homer	5.71811	FindMotif_ChIP-Seq
rs1267204	chr12	28143975	28143983	CRX(Homeobox)/Retina-Crx-ChIP-Seq/Homer	5.72758	FindMotif_ChIP-Seq
rs9923147	chr16	53801542	53801550	CRX(Homeobox)/Retina-Crx-ChIP-Seq/Homer	5.72758	FindMotif_ChIP-Seq
rs11075990	chr16	53819890	53819900	Lhx3(Homeobox)/Forebrain-p300-ChIP-Seq/Homer	5.73473	FindMotif_ChIP-Seq
rs1267210	chr12	28140910	28140925	PR(NR)/T47D-PR-ChIP-Seq(GSE31130)/Homer	5.74034	FindMotif_ChIP-Seq
rs9940646	chr16	53800620	53800630	Nanog(Homeobox)/mES-Nanog-ChIP-Seq/Homer	5.74203	FindMotif_ChIP-Seq
rs4642377	chr5	44885230	44885240	Eomes(T-box)/H9-Eomes-ChIP-Seq/Homer	5.74559	FindMotif_ChIP-Seq
rs73169056	chr22	40986258	40986266	CRX(Homeobox)/Retina-Crx-ChIP-Seq/Homer	5.75287	FindMotif_ChIP-Seq
rs2042032	chr16	53858577	53858587	Lhx3(Homeobox)/Forebrain-p300-ChIP-Seq/Homer	5.75748	FindMotif_ChIP-Seq
rs9877680	chr3	4751159	4751169	Erra(NR)/HepG2-Erra-ChIP-Seq/Homer	5.78061	FindMotif_ChIP-Seq
rs62501788	chr8	29516995	29517005	Nkx3.1(Homeobox)/LNCaP-Nkx3.1-ChIP-Seq(GSE28264)/Homer	5.79893	FindMotif_ChIP-Seq
rs11783807	chr8	129194527	129194537	AR-halfsite(NR)/LNCaP-AR-ChIP-Seq/Homer	5.83809	FindMotif_ChIP-Seq
rs6001980	chr22	41004376	41004391	PR(NR)/T47D-PR-ChIP-Seq(GSE31130)/Homer	5.84634	FindMotif_ChIP-Seq
rs1267212	chr12	28140709	28140719	Eomes(T-box)/H9-Eomes-ChIP-Seq/Homer	5.85986	FindMotif_ChIP-Seq
rs11075992	chr16	53820065	53820075	Eomes(T-box)/H9-Eomes-ChIP-Seq/Homer	5.87036	FindMotif_ChIP-Seq
rs1274656	chr14	68679481	68679491	Eomes(T-box)/H9-Eomes-ChIP-Seq/Homer	5.87036	FindMotif_ChIP-Seq
rs672888	chr8	128345458	128345466	Tbx5(T-box)/HL1-Tbx5.biotin-ChIP-Seq/Homer	5.92691	FindMotif_ChIP-Seq
rs3760984	chr19	44286755	44286765	AR-halfsite(NR)/LNCaP-AR-ChIP-Seq/Homer	5.94077	FindMotif_ChIP-Seq
rs4506565	chr10	114756034	114756044	Eomes(T-box)/H9-Eomes-ChIP-Seq/Homer	5.9437	FindMotif_ChIP-Seq
rs3827381	chr22	40881392	40881407	PR(NR)/T47D-PR-ChIP-Seq(GSE31130)/Homer	5.94959	FindMotif_ChIP-Seq
rs11055880	chr12	14410625	14410640	PR(NR)/T47D-PR-ChIP-Seq(GSE31130)/Homer	5.97964	FindMotif_ChIP-Seq
rs35270244	chr1	204548408	204548416	SCL/HPC7-Scl-ChIP-Seq/Homer	5.9957	FindMotif_ChIP-Seq
rs12546580	chr8	129180503	129180513	Eomes(T-box)/H9-Eomes-ChIP-Seq/Homer	6.00883	FindMotif_ChIP-Seq
rs61132534	chr3	30689194	30689204	Nkx2.5(Homeobox)/HL1-Nkx2.5.biotin-ChIP-Seq/Homer	6.01154	FindMotif_ChIP-Seq
rs7465306	chr8	29504907	29504917	Eomes(T-box)/H9-Eomes-ChIP-Seq/Homer	6.02387	FindMotif_ChIP-Seq
rs6480918	chr10	80836342	80836352	Nkx3.1(Homeobox)/LNCaP-Nkx3.1-ChIP-Seq(GSE28264)/Homer	6.02659	FindMotif_ChIP-Seq
rs10843071	chr12	28178764	28178774	Nkx2.5(Homeobox)/HL1-Nkx2.5.biotin-ChIP-Seq/Homer	6.04546	FindMotif_ChIP-Seq
rs17756000	chr14	69019532	69019542	Eomes(T-box)/H9-Eomes-ChIP-Seq/Homer	6.0471	FindMotif_ChIP-Seq
rs2993433	chr1	202190740	202190750	Nanog(Homeobox)/mES-Nanog-ChIP-Seq/Homer	6.05517	FindMotif_ChIP-Seq
rs3751812	chr16	53818450	53818460	Eomes(T-box)/H9-Eomes-ChIP-Seq/Homer	6.06317	FindMotif_ChIP-Seq
rs7463114	chr8	29507089	29507099	Eomes(T-box)/H9-Eomes-ChIP-Seq/Homer	6.06317	FindMotif_ChIP-Seq
rs1152739	chr1	10538951	10538959	Tbx5(T-box)/HL1-Tbx5.biotin-ChIP-Seq/Homer	6.07763	FindMotif_ChIP-Seq
rs6731836	chr2	19321999	19322007	Tbx5(T-box)/HL1-Tbx5.biotin-ChIP-Seq/Homer	6.07882	FindMotif_ChIP-Seq
rs5995867	chr22	40888135	40888145	Znf263(Zf)/K562-Znf263-ChIP-Seq/Homer	6.08043	FindMotif_ChIP-Seq
rs8047395	chr16	53798517	53798527	Eomes(T-box)/H9-Eomes-ChIP-Seq/Homer	6.08525	FindMotif_ChIP-Seq
rs9923312	chr16	53819367	53819377	Nkx3.1(Homeobox)/LNCaP-Nkx3.1-ChIP-Seq(GSE28264)/Homer	6.09454	FindMotif_ChIP-Seq
rs8106096	chr19	18536414	18536422	ZNF711(Zf)/SH-SY5Y-ZNF711-ChIP-Seq/Homer	6.11515	FindMotif_ChIP-Seq
rs11083720	chr19	44281492	44281500	Smad3(MAD)/NPC-Smad3-ChIP-Seq(GSE36673)/Homer	6.11917	FindMotif_ChIP-Seq
rs138175438	chr22	40893899	40893907	ZNF711(Zf)/SH-SY5Y-ZNF711-ChIP-Seq/Homer	6.11987	FindMotif_ChIP-Seq
rs2737455	chr12	28149608	28149618	Olig2(bHLH)/Neuron-Olig2-ChIP-Seq(GSE30882)/Homer	6.129	FindMotif_ChIP-Seq
rs2737456	chr12	28149608	28149618	Olig2(bHLH)/Neuron-Olig2-ChIP-Seq(GSE30882)/Homer	6.129	FindMotif_ChIP-Seq
rs12777512	chr10	123093405	123093413	Smad3(MAD)/NPC-Smad3-ChIP-Seq(GSE36673)/Homer	6.13778	FindMotif_ChIP-Seq
rs56681564	chr6	151938465	151938475	Olig2(bHLH)/Neuron-Olig2-ChIP-Seq(GSE30882)/Homer	6.15603	FindMotif_ChIP-Seq
rs76969790	chr5	58395673	58395681	SCL/HPC7-Scl-ChIP-Seq/Homer	6.16492	FindMotif_ChIP-Seq
rs1267212	chr12	28140709	28140717	Tbx5(T-box)/HL1-Tbx5.biotin-ChIP-Seq/Homer	6.16561	FindMotif_ChIP-Seq
rs2588828	chr14	68613475	68613483	Tbx5(T-box)/HL1-Tbx5.biotin-ChIP-Seq/Homer	6.16561	FindMotif_ChIP-Seq
rs805511	chr12	28139731	28139741	Nanog(Homeobox)/mES-Nanog-ChIP-Seq/Homer	6.1741	FindMotif_ChIP-Seq
rs9923233	chr16	53819192	53819202	Lhx3(Homeobox)/Forebrain-p300-ChIP-Seq/Homer	6.18692	FindMotif_ChIP-Seq
rs672888	chr8	128345458	128345468	Eomes(T-box)/H9-Eomes-ChIP-Seq/Homer	6.18852	FindMotif_ChIP-Seq
rs9937429	chr16	53854161	53854169	SCL/HPC7-Scl-ChIP-Seq/Homer	6.21958	FindMotif_ChIP-Seq
rs252917	chr5	56123432	56123440	CRX(Homeobox)/Retina-Crx-ChIP-Seq/Homer	6.21992	FindMotif_ChIP-Seq
rs57481445	chr2	218296371	218296379	SCL/HPC7-Scl-ChIP-Seq/Homer	6.25298	FindMotif_ChIP-Seq
rs7188250	chr16	53834606	53834616	AR-halfsite(NR)/LNCaP-AR-ChIP-Seq/Homer	6.25569	FindMotif_ChIP-Seq
rs17756000	chr14	69019529	69019539	Olig2(bHLH)/Neuron-Olig2-ChIP-Seq(GSE30882)/Homer	6.2574	FindMotif_ChIP-Seq
rs13219495	chr6	1321440	1321450	BMYB(HTH)/Hela-BMYB-ChIPSeq(GSE27030)/Homer	6.26282	FindMotif_ChIP-Seq
rs12651949	chr5	44798107	44798115	Tbx5(T-box)/HL1-Tbx5.biotin-ChIP-Seq/Homer	6.27854	FindMotif_ChIP-Seq
rs1668875	chr8	128341101	128341109	Tbx5(T-box)/HL1-Tbx5.biotin-ChIP-Seq/Homer	6.27854	FindMotif_ChIP-Seq
rs1902778	chr8	129194848	129194858	Olig2(bHLH)/Neuron-Olig2-ChIP-Seq(GSE30882)/Homer	6.29888	FindMotif_ChIP-Seq
rs7979536	chr12	115822087	115822097	AR-halfsite(NR)/LNCaP-AR-ChIP-Seq/Homer	6.31311	FindMotif_ChIP-Seq
rs1351163	chr2	218267985	218267993	Smad3(MAD)/NPC-Smad3-ChIP-Seq(GSE36673)/Homer	6.31931	FindMotif_ChIP-Seq
rs13249993	chr8	128350512	128350520	Foxo1(Forkhead)/RAW-Foxo1-ChIP-Seq/Homer	6.32656	FindMotif_ChIP-Seq
rs7924080	chr10	114787007	114787017	BMYB(HTH)/Hela-BMYB-ChIPSeq(GSE27030)/Homer	6.35387	FindMotif_ChIP-Seq
rs17756000	chr14	69019538	69019546	SCL/HPC7-Scl-ChIP-Seq/Homer	6.3645	FindMotif_ChIP-Seq
rs11075993	chr16	53837137	53837145	Tbx5(T-box)/HL1-Tbx5.biotin-ChIP-Seq/Homer	6.3693	FindMotif_ChIP-Seq
rs3751812	chr16	53818458	53818466	Tbx5(T-box)/HL1-Tbx5.biotin-ChIP-Seq/Homer	6.3693	FindMotif_ChIP-Seq
rs10206829	chr2	19321491	19321501	AR-halfsite(NR)/LNCaP-AR-ChIP-Seq/Homer	6.3893	FindMotif_ChIP-Seq
rs72997390	chr3	4751036	4751046	Eomes(T-box)/H9-Eomes-ChIP-Seq/Homer	6.4055	FindMotif_ChIP-Seq
rs35936842	chr10	114818766	114818776	BMYB(HTH)/Hela-BMYB-ChIPSeq(GSE27030)/Homer	6.4406	FindMotif_ChIP-Seq
rs634534	chr11	65665256	65665266	Eomes(T-box)/H9-Eomes-ChIP-Seq/Homer	6.44253	FindMotif_ChIP-Seq
rs13075137	chr3	4765089	4765099	BMYB(HTH)/Hela-BMYB-ChIPSeq(GSE27030)/Homer	6.44893	FindMotif_ChIP-Seq
rs2306881	chr3	4753711	4753721	BMYB(HTH)/Hela-BMYB-ChIPSeq(GSE27030)/Homer	6.45199	FindMotif_ChIP-Seq
rs7826557	chr8	128345731	128345741	BMYB(HTH)/Hela-BMYB-ChIPSeq(GSE27030)/Homer	6.46595	FindMotif_ChIP-Seq
rs2823107	chr21	16535532	16535542	Lhx3(Homeobox)/Forebrain-p300-ChIP-Seq/Homer	6.47753	FindMotif_ChIP-Seq
rs7957915	chr12	28180502	28180512	Olig2(bHLH)/Neuron-Olig2-ChIP-Seq(GSE30882)/Homer	6.50115	FindMotif_ChIP-Seq
rs1250009	chr10	80845410	80845418	Foxo1(Forkhead)/RAW-Foxo1-ChIP-Seq/Homer	6.50196	FindMotif_ChIP-Seq
rs10422108	chr19	44294867	44294877	Nkx3.1(Homeobox)/LNCaP-Nkx3.1-ChIP-Seq(GSE28264)/Homer	6.5384	FindMotif_ChIP-Seq
rs4950836	chr1	202192621	202192629	Smad3(MAD)/NPC-Smad3-ChIP-Seq(GSE36673)/Homer	6.54246	FindMotif_ChIP-Seq
rs13388294	chr2	218295406	218295414	ZNF711(Zf)/SH-SY5Y-ZNF711-ChIP-Seq/Homer	6.55816	FindMotif_ChIP-Seq
rs6001980	chr22	41004383	41004391	Smad3(MAD)/NPC-Smad3-ChIP-Seq(GSE36673)/Homer	6.57258	FindMotif_ChIP-Seq
rs7957915	chr12	28180502	28180510	SCL/HPC7-Scl-ChIP-Seq/Homer	6.58028	FindMotif_ChIP-Seq
rs10843061	chr12	28174563	28174573	Eomes(T-box)/H9-Eomes-ChIP-Seq/Homer	6.59552	FindMotif_ChIP-Seq
rs73169089	chr22	41024849	41024859	AP-1(bZIP)/ThioMac-PU.1-ChIP-Seq/Homer	6.6291	FindMotif_ChIP-Seq
rs10843056	chr12	28172142	28172152	Olig2(bHLH)/Neuron-Olig2-ChIP-Seq(GSE30882)/Homer	6.63013	FindMotif_ChIP-Seq
rs9877680	chr3	4751159	4751169	AR-halfsite(NR)/LNCaP-AR-ChIP-Seq/Homer	6.63412	FindMotif_ChIP-Seq
rs866223	chr5	56125343	56125353	BMYB(HTH)/Hela-BMYB-ChIPSeq(GSE27030)/Homer	6.63802	FindMotif_ChIP-Seq
rs9937429	chr16	53854161	53854171	Olig2(bHLH)/Neuron-Olig2-ChIP-Seq(GSE30882)/Homer	6.64214	FindMotif_ChIP-Seq
rs11136085	chr8	29524034	29524042	GATA3(Zf)/iTreg-Gata3-ChIP-Seq(GSE20898)/Homer	6.64794	FindMotif_ChIP-Seq
rs8058930	chr16	53860663	53860671	Foxo1(Forkhead)/RAW-Foxo1-ChIP-Seq/Homer	6.66701	FindMotif_ChIP-Seq
rs1155708	chr3	30686734	30686744	BMYB(HTH)/Hela-BMYB-ChIPSeq(GSE27030)/Homer	6.66816	FindMotif_ChIP-Seq
rs56103707	chr19	44304181	44304189	SCL/HPC7-Scl-ChIP-Seq/Homer	6.68065	FindMotif_ChIP-Seq
rs634534	chr11	65665256	65665264	Tbx5(T-box)/HL1-Tbx5.biotin-ChIP-Seq/Homer	6.69753	FindMotif_ChIP-Seq
rs6913578	chr6	151949798	151949808	Eomes(T-box)/H9-Eomes-ChIP-Seq/Homer	6.69984	FindMotif_ChIP-Seq
rs10843069	chr12	28177656	28177666	Eomes(T-box)/H9-Eomes-ChIP-Seq/Homer	6.70093	FindMotif_ChIP-Seq
rs12155535	chr8	29523506	29523514	GATA3(Zf)/iTreg-Gata3-ChIP-Seq(GSE20898)/Homer	6.70544	FindMotif_ChIP-Seq
rs3010071	chr1	202190780	202190788	GATA3(Zf)/iTreg-Gata3-ChIP-Seq(GSE20898)/Homer	6.70544	FindMotif_ChIP-Seq
rs10736303	chr10	123334455	123334463	Smad3(MAD)/NPC-Smad3-ChIP-Seq(GSE36673)/Homer	6.72195	FindMotif_ChIP-Seq
rs8050124	chr16	53853205	53853213	SCL/HPC7-Scl-ChIP-Seq/Homer	6.73752	FindMotif_ChIP-Seq
rs13356086	chr5	44887678	44887688	Olig2(bHLH)/Neuron-Olig2-ChIP-Seq(GSE30882)/Homer	6.77785	FindMotif_ChIP-Seq
rs10956362	chr8	128350384	128350392	Smad3(MAD)/NPC-Smad3-ChIP-Seq(GSE36673)/Homer	6.79573	FindMotif_ChIP-Seq
rs8100767	chr19	18589078	18589093	PR(NR)/T47D-PR-ChIP-Seq(GSE31130)/Homer	6.79782	FindMotif_ChIP-Seq
rs6558136	chr8	29523119	29523129	BMYB(HTH)/Hela-BMYB-ChIPSeq(GSE27030)/Homer	6.8031	FindMotif_ChIP-Seq
rs8103622	chr19	18572834	18572844	E2A(HLH)/proBcell-E2A-ChIP-Seq/Homer	6.87127	FindMotif_ChIP-Seq
rs3954757	chr10	5888060	5888068	Smad3(MAD)/NPC-Smad3-ChIP-Seq(GSE36673)/Homer	6.87172	FindMotif_ChIP-Seq
rs689274	chr11	65665984	65665994	Nkx3.1(Homeobox)/LNCaP-Nkx3.1-ChIP-Seq(GSE28264)/Homer	6.88703	FindMotif_ChIP-Seq
rs11075990	chr16	53819889	53819899	Nanog(Homeobox)/mES-Nanog-ChIP-Seq/Homer	6.89355	FindMotif_ChIP-Seq
rs62033399	chr16	53810934	53810944	Nanog(Homeobox)/mES-Nanog-ChIP-Seq/Homer	6.91843	FindMotif_ChIP-Seq
rs8050133	chr16	53853219	53853229	E2A(HLH)/proBcell-E2A-ChIP-Seq/Homer	6.92243	FindMotif_ChIP-Seq
rs62033403	chr16	53822232	53822244	Atoh1(bHLH)/Cerebellum-Atoh1-ChIP-Seq/Homer	6.9236	FindMotif_ChIP-Seq
rs62033404	chr16	53822232	53822244	Atoh1(bHLH)/Cerebellum-Atoh1-ChIP-Seq/Homer	6.9236	FindMotif_ChIP-Seq
rs17756000	chr14	69019532	69019540	Tbx5(T-box)/HL1-Tbx5.biotin-ChIP-Seq/Homer	6.92775	FindMotif_ChIP-Seq
rs7463114	chr8	29507089	29507097	Tbx5(T-box)/HL1-Tbx5.biotin-ChIP-Seq/Homer	6.92775	FindMotif_ChIP-Seq
rs55806820	chr2	218266745	218266755	Eomes(T-box)/H9-Eomes-ChIP-Seq/Homer	6.95692	FindMotif_ChIP-Seq
rs1499364	chr8	129179917	129179927	Nkx3.1(Homeobox)/LNCaP-Nkx3.1-ChIP-Seq(GSE28264)/Homer	6.95695	FindMotif_ChIP-Seq
rs28524866	chr8	128378189	128378197	NF1-halfsite(CTF)/LNCaP-NF1-ChIP-Seq/Homer	6.9604	FindMotif_ChIP-Seq
rs6992491	chr8	129197897	129197907	AP-1(bZIP)/ThioMac-PU.1-ChIP-Seq/Homer	6.96391	FindMotif_ChIP-Seq
rs6558139	chr8	29530479	29530487	NF1-halfsite(CTF)/LNCaP-NF1-ChIP-Seq/Homer	6.96673	FindMotif_ChIP-Seq
rs73167090	chr22	40888361	40888369	NF1-halfsite(CTF)/LNCaP-NF1-ChIP-Seq/Homer	6.96673	FindMotif_ChIP-Seq
rs8050136	chr16	53816269	53816279	Nanog(Homeobox)/mES-Nanog-ChIP-Seq/Homer	6.9969	FindMotif_ChIP-Seq
rs662064	chr1	10557245	10557253	SCL/HPC7-Scl-ChIP-Seq/Homer	7.05849	FindMotif_ChIP-Seq
rs10422108	chr19	44294860	44294870	Znf263(Zf)/K562-Znf263-ChIP-Seq/Homer	7.09536	FindMotif_ChIP-Seq
rs9931494	chr16	53827173	53827181	CRX(Homeobox)/Retina-Crx-ChIP-Seq/Homer	7.13917	FindMotif_ChIP-Seq
rs204243	chr6	13729032	13729042	Olig2(bHLH)/Neuron-Olig2-ChIP-Seq(GSE30882)/Homer	7.19769	FindMotif_ChIP-Seq
rs3827381	chr22	40881399	40881407	Foxo1(Forkhead)/RAW-Foxo1-ChIP-Seq/Homer	7.20139	FindMotif_ChIP-Seq
rs12637272	chr3	27389598	27389606	CRX(Homeobox)/Retina-Crx-ChIP-Seq/Homer	7.21636	FindMotif_ChIP-Seq
rs1499364	chr8	129179917	129179927	Nkx2.5(Homeobox)/HL1-Nkx2.5.biotin-ChIP-Seq/Homer	7.24947	FindMotif_ChIP-Seq
rs57481445	chr2	218296369	218296381	Atoh1(bHLH)/Cerebellum-Atoh1-ChIP-Seq/Homer	7.26741	FindMotif_ChIP-Seq
rs6585200	chr10	114768609	114768619	AR-halfsite(NR)/LNCaP-AR-ChIP-Seq/Homer	7.31315	FindMotif_ChIP-Seq
rs662064	chr1	10557245	10557253	MyoG(HLH)/C2C12-MyoG-ChIP-Seq(GSE36024)/Homer	7.35879	FindMotif_ChIP-Seq
rs2026792	chr1	10594788	10594798	AR-halfsite(NR)/LNCaP-AR-ChIP-Seq/Homer	7.37425	FindMotif_ChIP-Seq
rs62501788	chr8	29516995	29517005	Nkx2.5(Homeobox)/HL1-Nkx2.5.biotin-ChIP-Seq/Homer	7.39018	FindMotif_ChIP-Seq
rs56051217	chr22	41049396	41049404	Smad3(MAD)/NPC-Smad3-ChIP-Seq(GSE36673)/Homer	7.39851	FindMotif_ChIP-Seq
rs8066588	chr17	53025686	53025696	E2A(HLH)/proBcell-E2A-ChIP-Seq/Homer	7.40401	FindMotif_ChIP-Seq
rs6001949	chr22	40904485	40904493	ZNF711(Zf)/SH-SY5Y-ZNF711-ChIP-Seq/Homer	7.43496	FindMotif_ChIP-Seq
rs7074440	chr10	114785416	114785426	Eomes(T-box)/H9-Eomes-ChIP-Seq/Homer	7.4694	FindMotif_ChIP-Seq
rs11049294	chr12	28181397	28181405	Maz(Zf)/HepG2-Maz-ChIP-Seq(GSE31477)/Homer	7.47877	FindMotif_ChIP-Seq
rs13356086	chr5	44887678	44887686	SCL/HPC7-Scl-ChIP-Seq/Homer	7.51956	FindMotif_ChIP-Seq
rs10087810	chr8	128352721	128352731	Nkx3.1(Homeobox)/LNCaP-Nkx3.1-ChIP-Seq(GSE28264)/Homer	7.57508	FindMotif_ChIP-Seq
rs57481445	chr2	218296372	218296382	Tcf12(HLH)/GM12878-Tcf12-ChIP-Seq/Homer	7.64825	FindMotif_ChIP-Seq
rs10843056	chr12	28172141	28172156	PR(NR)/T47D-PR-ChIP-Seq(GSE31130)/Homer	7.655	FindMotif_ChIP-Seq
rs10843056	chr12	28172140	28172152	Atoh1(bHLH)/Cerebellum-Atoh1-ChIP-Seq/Homer	7.67141	FindMotif_ChIP-Seq
rs4073220	chr8	29502901	29502911	Lhx3(Homeobox)/Forebrain-p300-ChIP-Seq/Homer	7.68015	FindMotif_ChIP-Seq
rs7074440	chr10	114785423	114785433	E2A(HLH)/proBcell-E2A-ChIP-Seq/Homer	7.69147	FindMotif_ChIP-Seq
rs10483812	chr14	69017843	69017853	Nkx3.1(Homeobox)/LNCaP-Nkx3.1-ChIP-Seq(GSE28264)/Homer	7.70822	FindMotif_ChIP-Seq
rs13356086	chr5	44887669	44887679	Olig2(bHLH)/Neuron-Olig2-ChIP-Seq(GSE30882)/Homer	7.75155	FindMotif_ChIP-Seq
rs11629070	chr14	69042983	69042993	Erra(NR)/HepG2-Erra-ChIP-Seq/Homer	7.75308	FindMotif_ChIP-Seq
rs62033408	chr16	53827957	53827965	NF1-halfsite(CTF)/LNCaP-NF1-ChIP-Seq/Homer	7.79195	FindMotif_ChIP-Seq
rs597438	chr1	10554499	10554507	Foxo1(Forkhead)/RAW-Foxo1-ChIP-Seq/Homer	7.82026	FindMotif_ChIP-Seq
rs4073220	chr8	29502908	29502918	Lhx3(Homeobox)/Forebrain-p300-ChIP-Seq/Homer	7.82192	FindMotif_ChIP-Seq
rs76969790	chr5	58395674	58395684	Tcf12(HLH)/GM12878-Tcf12-ChIP-Seq/Homer	7.85456	FindMotif_ChIP-Seq
rs17756000	chr14	69019530	69019540	Tcf12(HLH)/GM12878-Tcf12-ChIP-Seq/Homer	7.88864	FindMotif_ChIP-Seq
rs2588828	chr14	68613475	68613485	Eomes(T-box)/H9-Eomes-ChIP-Seq/Homer	7.90668	FindMotif_ChIP-Seq
rs7074440	chr10	114785416	114785424	Tbx5(T-box)/HL1-Tbx5.biotin-ChIP-Seq/Homer	7.93855	FindMotif_ChIP-Seq
rs17756000	chr14	69019528	69019538	E2A(HLH)/proBcell-E2A-ChIP-Seq/Homer	8.04424	FindMotif_ChIP-Seq
rs1152739	chr1	10538944	10538954	E2A(HLH)/proBcell-E2A-ChIP-Seq/Homer	8.07521	FindMotif_ChIP-Seq
rs6999897	chr8	129192703	129192711	GATA3(Zf)/iTreg-Gata3-ChIP-Seq(GSE20898)/Homer	8.10803	FindMotif_ChIP-Seq
rs9937429	chr16	53854162	53854172	Tcf12(HLH)/GM12878-Tcf12-ChIP-Seq/Homer	8.13858	FindMotif_ChIP-Seq
rs8050124	chr16	53853205	53853213	MyoG(HLH)/C2C12-MyoG-ChIP-Seq(GSE36024)/Homer	8.1795	FindMotif_ChIP-Seq
rs9923544	chr16	53801985	53801995	AR-halfsite(NR)/LNCaP-AR-ChIP-Seq/Homer	8.19072	FindMotif_ChIP-Seq
rs57481445	chr2	218296370	218296380	E2A(HLH)/proBcell-E2A-ChIP-Seq/Homer	8.19486	FindMotif_ChIP-Seq
rs17756000	chr14	69019537	69019547	Tcf12(HLH)/GM12878-Tcf12-ChIP-Seq/Homer	8.20247	FindMotif_ChIP-Seq
rs12680772	chr8	29502116	29502124	Maz(Zf)/HepG2-Maz-ChIP-Seq(GSE31477)/Homer	8.22718	FindMotif_ChIP-Seq
rs9937429	chr16	53854160	53854170	E2A(HLH)/proBcell-E2A-ChIP-Seq/Homer	8.29305	FindMotif_ChIP-Seq
rs6470608	chr8	129196570	129196578	CRX(Homeobox)/Retina-Crx-ChIP-Seq/Homer	8.31722	FindMotif_ChIP-Seq
rs17465283	chr8	128355823	128355833	AR-halfsite(NR)/LNCaP-AR-ChIP-Seq/Homer	8.33616	FindMotif_ChIP-Seq
rs10507259	chr12	115821311	115821319	CRX(Homeobox)/Retina-Crx-ChIP-Seq/Homer	8.36188	FindMotif_ChIP-Seq
rs13356086	chr5	44887679	44887689	E2A(HLH)/proBcell-E2A-ChIP-Seq/Homer	8.38674	FindMotif_ChIP-Seq
rs1917063	chr6	82323201	82323209	GATA3(Zf)/iTreg-Gata3-ChIP-Seq(GSE20898)/Homer	8.43721	FindMotif_ChIP-Seq
rs946711	chr10	21806831	21806843	Atoh1(bHLH)/Cerebellum-Atoh1-ChIP-Seq/Homer	8.56825	FindMotif_ChIP-Seq
rs11055886	chr12	14416498	14416508	AR-halfsite(NR)/LNCaP-AR-ChIP-Seq/Homer	8.58302	FindMotif_ChIP-Seq
rs6001942	chr22	40893858	40893868	AR-halfsite(NR)/LNCaP-AR-ChIP-Seq/Homer	8.58302	FindMotif_ChIP-Seq
rs997199	chr12	28119382	28119390	MYB(HTH)/ERMYB-Myb-ChIPSeq(GSE22095)/Homer	8.6029	FindMotif_ChIP-Seq
rs7074440	chr10	114785420	114785430	AP-1(bZIP)/ThioMac-PU.1-ChIP-Seq/Homer	8.65752	FindMotif_ChIP-Seq
rs57481445	chr2	218296371	218296379	MyoG(HLH)/C2C12-MyoG-ChIP-Seq(GSE36024)/Homer	8.6642	FindMotif_ChIP-Seq
rs9420318	chr10	123093178	123093188	Erra(NR)/HepG2-Erra-ChIP-Seq/Homer	8.71591	FindMotif_ChIP-Seq
rs12680772	chr8	29502115	29502123	Maz(Zf)/HepG2-Maz-ChIP-Seq(GSE31477)/Homer	8.73681	FindMotif_ChIP-Seq
rs13356086	chr5	44887678	44887686	MyoG(HLH)/C2C12-MyoG-ChIP-Seq(GSE36024)/Homer	8.88673	FindMotif_ChIP-Seq
rs424001	chr6	13715996	13716006	AP-1(bZIP)/ThioMac-PU.1-ChIP-Seq/Homer	8.88954	FindMotif_ChIP-Seq
rs76969790	chr5	58395672	58395682	E2A(HLH)/proBcell-E2A-ChIP-Seq/Homer	8.89522	FindMotif_ChIP-Seq
rs4866783	chr5	44876501	44876509	CRX(Homeobox)/Retina-Crx-ChIP-Seq/Homer	8.9587	FindMotif_ChIP-Seq
rs13356086	chr5	44887670	44887680	Tcf12(HLH)/GM12878-Tcf12-ChIP-Seq/Homer	9.18648	FindMotif_ChIP-Seq
rs62033399	chr16	53810935	53810945	Lhx3(Homeobox)/Forebrain-p300-ChIP-Seq/Homer	9.21771	FindMotif_ChIP-Seq
rs739874	chr14	68974400	68974410	Lhx3(Homeobox)/Forebrain-p300-ChIP-Seq/Homer	9.24085	FindMotif_ChIP-Seq
rs7957915	chr12	28180500	28180512	Atoh1(bHLH)/Cerebellum-Atoh1-ChIP-Seq/Homer	9.32884	FindMotif_ChIP-Seq
rs17756000	chr14	69019538	69019546	MyoG(HLH)/C2C12-MyoG-ChIP-Seq(GSE36024)/Homer	9.43091	FindMotif_ChIP-Seq
rs62033399	chr16	53810942	53810952	Lhx3(Homeobox)/Forebrain-p300-ChIP-Seq/Homer	9.46	FindMotif_ChIP-Seq
rs1314913	chr14	68699588	68699598	AP-1(bZIP)/ThioMac-PU.1-ChIP-Seq/Homer	9.4758	FindMotif_ChIP-Seq
rs424001	chr6	13715988	13715998	AP-1(bZIP)/ThioMac-PU.1-ChIP-Seq/Homer	9.66488	FindMotif_ChIP-Seq
rs55722862	chr22	40932041	40932051	Nkx3.1(Homeobox)/LNCaP-Nkx3.1-ChIP-Seq(GSE28264)/Homer	9.69801	FindMotif_ChIP-Seq
rs11199913	chr10	123092376	123092386	Erra(NR)/HepG2-Erra-ChIP-Seq/Homer	9.7589	FindMotif_ChIP-Seq
rs73169097	chr22	41027863	41027873	Znf263(Zf)/K562-Znf263-ChIP-Seq/Homer	9.82599	FindMotif_ChIP-Seq
rs2288428	chr19	18544459	18544467	Maz(Zf)/HepG2-Maz-ChIP-Seq(GSE31477)/Homer	9.89832	FindMotif_ChIP-Seq
rs11088299	chr21	16536760	16536742	EWSR1-FLI1	-13.2	Haploreg
rs10090685	chr8	76610355	76610368	Hsf_2	-12	Haploreg
rs11075991	chr16	53819947	53819934	RORalpha1_2	-12	Haploreg
rs1250006	chr10	80846515	80846535	Foxp1	-12	Haploreg
rs521667	chr18	24338469	24338489	RREB-1_2	-12	Haploreg
rs6001982	chr22	41019935	41019951	Mef2_1	-12	Haploreg
rs8050124	chr16	53853219	53853202	LUN-1	-12	Haploreg
rs9311400	chr3	4764179	4764159	Foxp1	-12	Haploreg
rs9311401	chr3	4764179	4764159	Foxp1	-12	Haploreg
rs10843069	chr12	28177646	28177658	Irf_4	-11.1	Haploreg
rs704012	chr10	80839029	80839043	Roaz_1	-10.5	Haploreg
rs62033406	chr16	53824230	53824217	Zec	-9.1	Haploreg
rs7519417	chr1	204449957	204449939	EWSR1-FLI1	-9	Haploreg
rs704012	chr10	80839028	80839043	Roaz_2	-8.9	Haploreg
rs12232972	chr2	218257281	218257267	BLIMP1	-8.5	Haploreg
rs4073220	chr8	29502915	29502903	Pou2f1_8	-7.7	Haploreg
rs11669175	chr19	44289820	44289834	Cphx	-7.2	Haploreg
rs6868779	chr5	44886006	44885984	Mef2_2	-6.4	Haploreg
rs2737448	chr12	28153242	28153262	Foxp1	-6.2	Haploreg
rs73167079	chr22	40883070	40883090	Foxp1	-6.2	Haploreg
rs7838714	chr8	128343961	128343939	Pou2f1_9	-5.4	Haploreg
rs2372092	chr3	30687561	30687543	Mef2_6	-5	Haploreg
rs637571	chr11	65664340	65664359	PPAR_2	-4.1	Haploreg
rs10900600	chr1	204559711	204559695	Hoxb13	-3.9	Haploreg
rs7136795	chr12	115813594	115813611	Zfp691	-3.9	Haploreg
rs8051591	chr16	53816743	53816755	Foxq1	-3.7	Haploreg
rs10843069	chr12	28177647	28177662	Irf_11	-3.6	Haploreg
rs2042032	chr16	53858573	53858589	Hoxa5_3	-3.4	Haploreg
rs6679717	chr1	204560670	204560684	Zfp187	-3.4	Haploreg
rs11844632	chr14	69026375	69026393	Esr2	-3.3	Haploreg
rs16857611	chr2	218296721	218296735	KROX	-3.3	Haploreg
rs2042032	chr16	53858572	53858589	Hoxc6	-3.3	Haploreg
rs62033403	chr16	53822239	53822224	Srf_3	-3.3	Haploreg
rs10843061	chr12	28174579	28174567	HNF1_3	-3	Haploreg
rs11136084	chr8	29523913	29523902	HNF1_3	-3	Haploreg
rs11649091	chr16	53845157	53845170	Lhx3_2	-3	Haploreg
rs2162797	chr19	18601013	18601028	Zfp281	-3	Haploreg
rs2737456	chr12	28149625	28149608	Pou3f3	-2.9	Haploreg
rs10416993	chr19	18600436	18600456	znf143	-2.8	Haploreg
rs6470608	chr8	129196556	129196572	Crx_2	-2.8	Haploreg
rs72997390	chr3	4751048	4751036	Cdc5	-2.8	Haploreg
rs9974193	chr21	16529025	16529039	Irf_9	-2.8	Haploreg
rs6470608	chr8	129196558	129196574	Pitx3	-2.7	Haploreg
rs17002019	chr22	40965332	40965361	NF-I_1	-2.6	Haploreg
rs7206790	chr16	53797920	53797906	BLIMP1	-2.6	Haploreg
rs2162797	chr19	18601011	18601027	Zfp740	-2.5	Haploreg
rs7193144	chr16	53810674	53810686	Foxq1	-2.5	Haploreg
rs6741887	chr2	19320396	19320381	Pou5f1_1	-2.4	Haploreg
rs9974193	chr21	16529027	16529042	Irf_11	-2.4	Haploreg
rs1314919	chr14	68711986	68711973	MZF1::1-4_2	-2.3	Haploreg
rs1560118	chr19	18570051	18570031	znf143	-2.3	Haploreg
rs35936842	chr10	114818788	114818769	PPAR_2	-2.3	Haploreg
rs67397162	chr8	129194018	129194003	LBP-1_3	-2.3	Haploreg
rs73169084	chr22	41022820	41022802	Esr2	-2.3	Haploreg
rs17817288	chr16	53807746	53807764	Cdx	-2.2	Haploreg
rs9937709	chr16	53820800	53820817	RXR_2	-2.2	Haploreg
rs11746506	chr5	44812578	44812561	Sox_13	-2.1	Haploreg
rs12265291	chr10	114810246	114810233	MZF1::1-4_2	-2.1	Haploreg
rs12473807	chr2	218300733	218300716	Sox_19	-2.1	Haploreg
rs62366821	chr5	44875433	44875449	Pou2f1_10	-2.1	Haploreg
rs10843061	chr12	28174577	28174565	HP1-site-factor	-2	Haploreg
rs1421085	chr16	53800965	53800953	HNF6	-2	Haploreg
rs1951631	chr14	68717534	68717521	Ik-3	-2	Haploreg
rs2737455	chr12	28149626	28149611	Pou5f1_2	-2	Haploreg
rs6558139	chr8	29530494	29530478	Mef2_1	-2	Haploreg
rs2042032	chr16	53858573	53858589	Hoxb6	-1.9	Haploreg
rs73169084	chr22	41022820	41022801	Esr1_1	-1.9	Haploreg
rs10843061	chr12	28174563	28174581	HNF1_6	-1.8	Haploreg
rs11240755	chr1	204478659	204478648	AP-1_1	-1.8	Haploreg
rs11649091	chr16	53845155	53845171	Cdx2_2	-1.8	Haploreg
rs424001	chr6	13715987	13715998	NF-E2	-1.8	Haploreg
rs9311401	chr3	4764162	4764179	Hoxa9	-1.8	Haploreg
rs10843055	chr12	28171835	28171819	Hand1_1	-1.7	Haploreg
rs11917237	chr3	30686917	30686934	Pou3f3	-1.7	Haploreg
rs16909788	chr12	14410291	14410309	Irf_8	-1.7	Haploreg
rs7190842	chr16	53858995	53859011	Isl2	-1.7	Haploreg
rs72722756	chr8	129186112	129186097	Irf_11	-1.7	Haploreg
rs8103622	chr19	18572849	18572831	Myf_3	-1.7	Haploreg
rs9311401	chr3	4764162	4764178	Hoxa10	-1.7	Haploreg
rs1250006	chr10	80846503	80846521	Foxa_3	-1.6	Haploreg
rs2628305	chr17	53140438	53140421	PPAR_3	-1.6	Haploreg
rs34409637	chr14	68719122	68719099	Pou2f1_4	-1.6	Haploreg
rs4439916	chr2	19314222	19314204	Irf_5	-1.6	Haploreg
rs72831295	chr17	53043794	53043804	Sp1_1	-1.6	Haploreg
rs8103622	chr19	18572846	18572834	Myf_2	-1.6	Haploreg
rs9311401	chr3	4764164	4764178	Cdx2_1	-1.6	Haploreg
rs17001977	chr22	40880201	40880229	PLZF	-1.5	Haploreg
rs4763378	chr12	14417807	14417825	Pou1f1_2	-1.5	Haploreg
rs72805613	chr16	53837326	53837343	Ncx_2	-1.5	Haploreg
rs9904377	chr17	52985988	52985971	Duxl	-1.5	Haploreg
rs11083720	chr19	44281493	44281479	RREB-1_1	-1.4	Haploreg
rs2737456	chr12	28149611	28149622	Octamer	-1.4	Haploreg
rs73169097	chr22	41027884	41027869	PPARG_3	-1.4	Haploreg
rs11136086	chr8	29524062	29524080	HNF1_6	-1.3	Haploreg
rs3802171	chr8	129200766	129200747	PPAR_1	-1.3	Haploreg
rs56681946	chr19	44283053	44283023	Pax-4_5	-1.3	Haploreg
rs62033399	chr16	53810931	53810947	Hoxa5_3	-1.3	Haploreg
rs637571	chr11	65664359	65664344	Zbtb7b	-1.3	Haploreg
rs7074440	chr10	114785414	114785424	TBX5_3	-1.3	Haploreg
rs72805613	chr16	53837328	53837343	Zfp105	-1.3	Haploreg
rs73169060	chr22	40994745	40994729	E2A_2	-1.3	Haploreg
rs8050133	chr16	53853218	53853230	Lmo2-complex_1	-1.3	Haploreg
rs10045264	chr5	44886430	44886443	MZF1::1-4_2	-1.2	Haploreg
rs11646715	chr16	53824000	53824020	Foxp1	-1.2	Haploreg
rs1250006	chr10	80846525	80846507	Cdx	-1.2	Haploreg
rs1274656	chr14	68679467	68679484	CDP_6	-1.2	Haploreg
rs4763378	chr12	14417829	14417813	Isl2	-1.2	Haploreg
rs646157	chr3	27352154	27352138	Mef2_3	-1.2	Haploreg
rs7188250	chr16	53834582	53834609	NR3C_10	-1.2	Haploreg
rs9937053	chr16	53799499	53799515	Hoxc10	-1.2	Haploreg
rs2737456	chr12	28149627	28149605	Pou2f1_9	-1.1	Haploreg
rs8103622	chr19	18572851	18572829	HEN1_1	-1.1	Haploreg
rs11649091	chr16	53845151	53845173	Sox_2	-1	Haploreg
rs13095432	chr3	30687024	30687002	TCF11::MafG	-1	Haploreg
rs1314919	chr14	68711983	68711973	MZF1::1-4_3	-1	Haploreg
rs35263707	chr3	30684117	30684095	Mef2_2	-1	Haploreg
rs424001	chr6	13716000	13715985	Bach1	-1	Haploreg
rs55760151	chr8	29517828	29517846	Cdx	-1	Haploreg
rs56124626	chr22	40907947	40907963	Foxl1_1	-1	Haploreg
rs56681564	chr6	151938466	151938452	CEBPB_1	-1	Haploreg
rs581761	chr8	128345234	128345217	Foxk1	-1	Haploreg
rs58943232	chr3	27392085	27392106	Pax-6_1	-1	Haploreg
rs6001942	chr22	40893859	40893875	Osr	-1	Haploreg
rs7519417	chr1	204449951	204449962	Olf-1_2	-1	Haploreg
rs79994966	chr16	53823738	53823725	Foxi1	-1	Haploreg
rs8103622	chr19	18572847	18572832	E2A_1	-1	Haploreg
rs9975709	chr21	16533642	16533626	Maf_1	-1	Haploreg
rs71423314	chr14	68988662	68988679	HNF1_2	-0.9	Haploreg
rs79994966	chr16	53823738	53823725	Foxf1	-0.9	Haploreg
rs10447995	chr8	128357902	128357925	Pou2f1_4	-0.8	Haploreg
rs17001974	chr22	40877393	40877381	AREB6_2	-0.8	Haploreg
rs2162797	chr19	18601012	18601024	ZNF219	-0.8	Haploreg
rs8107367	chr19	18564693	18564706	CEBP_1	-0.8	Haploreg
rs9311401	chr3	4764162	4764179	Hoxd10	-0.8	Haploreg
rs9937709	chr16	53820812	53820827	Irf_7	-0.8	Haploreg
rs17002030	chr22	40989368	40989391	Pou2f1_4	-0.7	Haploreg
rs3827381	chr22	40881394	40881412	NR3C_9	-0.7	Haploreg
rs4732697	chr8	29519877	29519861	Osr	-0.7	Haploreg
rs72805612	chr16	53834582	53834609	NR3C_10	-0.7	Haploreg
rs72805613	chr16	53837326	53837343	Dbx1	-0.7	Haploreg
rs72805613	chr16	53837343	53837326	Pax7	-0.7	Haploreg
rs788463	chr12	28152647	28152661	CEBP_2	-0.7	Haploreg
rs788463	chr12	28152647	28152661	CEBPA_1	-0.7	Haploreg
rs16857611	chr2	218296735	218296719	Klf7	-0.6	Haploreg
rs28432761	chr16	53823880	53823864	TATA_5	-0.6	Haploreg
rs56124626	chr22	40907946	40907964	Foxj2_1	-0.6	Haploreg
rs59597060	chr10	5887270	5887255	Zfp105	-0.6	Haploreg
rs73048670	chr19	44284539	44284531	LF-A1	-0.6	Haploreg
rs7957915	chr12	28180501	28180511	Tal1	-0.6	Haploreg
rs9972653	chr16	53814370	53814355	Zfp105	-0.6	Haploreg
rs11075993	chr16	53837159	53837143	Hoxa10	-0.5	Haploreg
rs1685191	chr19	44283240	44283228	Pax-4_3	-0.5	Haploreg
rs34771216	chr3	30683017	30683034	Hmbox1	-0.5	Haploreg
rs4803658	chr19	44290000	44290017	Hoxa9	-0.5	Haploreg
rs4803658	chr19	44289999	44290015	Hoxc10	-0.5	Haploreg
rs4951393	chr1	204489542	204489558	Bcl6b	-0.5	Haploreg
rs62033399	chr16	53810948	53810931	Prrx1	-0.5	Haploreg
rs62366821	chr5	44875463	44875447	Dbx2	-0.5	Haploreg
rs6723847	chr2	218256494	218256479	Ehf	-0.5	Haploreg
rs73048670	chr19	44284549	44284530	PPAR_2	-0.5	Haploreg
rs8047587	chr16	53798601	53798629	PLZF	-0.5	Haploreg
rs11136086	chr8	29524061	29524082	HNF1_7	-0.4	Haploreg
rs117669949	chr22	41026776	41026764	SREBP_4	-0.4	Haploreg
rs1250009	chr10	80845408	80845419	Foxo_1	-0.4	Haploreg
rs62033399	chr16	53810939	53810956	Pou6f1_2	-0.4	Haploreg
rs646157	chr3	27352156	27352142	Zfp187	-0.4	Haploreg
rs72722756	chr8	129186111	129186099	Irf_1	-0.4	Haploreg
rs72805613	chr16	53837325	53837342	Hoxc6	-0.4	Haploreg
rs72805613	chr16	53837326	53837342	Pou4f3	-0.4	Haploreg
rs739874	chr14	68974413	68974396	Gbx2	-0.4	Haploreg
rs7901695	chr10	114754071	114754088	Hoxd10	-0.4	Haploreg
rs8103622	chr19	18572850	18572831	CTCF	-0.4	Haploreg
rs9314380	chr8	29514403	29514387	Nr2f2	-0.4	Haploreg
rs10828266	chr10	22098702	22098685	YY1_1	-0.3	Haploreg
rs10900600	chr1	204559711	204559695	Hoxb9	-0.3	Haploreg
rs11240755	chr1	204478668	204478648	PPARG_4	-0.3	Haploreg
rs12463370	chr19	44292179	44292162	Sox_19	-0.3	Haploreg
rs2737447	chr12	28153549	28153519	Pax-4_4	-0.3	Haploreg
rs5020833	chr3	30670426	30670413	Nrf-1_1	-0.3	Haploreg
rs56124626	chr22	40907948	40907961	Foxi1	-0.3	Haploreg
rs6585198	chr10	114762247	114762235	Mrg_1	-0.3	Haploreg
rs72805613	chr16	53837325	53837342	Arid3a_2	-0.3	Haploreg
rs8050133	chr16	53853231	53853219	AREB6_3	-0.3	Haploreg
rs17726078	chr2	172974551	172974566	Ets_2	-0.2	Haploreg
rs2042032	chr16	53858573	53858589	Barx1	-0.2	Haploreg
rs2981578	chr10	123340330	123340312	Pou2f1_1	-0.2	Haploreg
rs3751812	chr16	53818445	53818461	Mrg_2	-0.2	Haploreg
rs646157	chr3	27352151	27352144	TATA_3	-0.2	Haploreg
rs79994966	chr16	53823725	53823748	Pou2f1_4	-0.2	Haploreg
rs10447995	chr8	128357923	128357941	Foxa_3	-0.1	Haploreg
rs10447995	chr8	128357923	128357940	Foxk1	-0.1	Haploreg
rs2588830	chr14	68609331	68609316	Foxa_1	-0.1	Haploreg
rs72805613	chr16	53837343	53837326	Esx1	-0.1	Haploreg
rs10828252	chr10	21856491	21856474	Pou6f1_2	0	Haploreg
rs10087810	chr8	128352729	128352745	Nkx2_11	0.1	Haploreg
rs4358083	chr2	19323063	19323077	Arid5a	0.1	Haploreg
rs739874	chr14	68974413	68974396	Esx1	0.1	Haploreg
rs10900600	chr1	204559715	204559698	Dbx1	0.2	Haploreg
rs10900600	chr1	204559724	204559707	Hoxd10	0.2	Haploreg
rs204246	chr6	13723387	13723373	Srf_6	0.2	Haploreg
rs62033399	chr16	53810931	53810947	Prrx2_1	0.2	Haploreg
rs9974193	chr21	16529026	16529040	BLIMP1	0.3	Haploreg
rs10828252	chr10	21856464	21856478	p300	0.4	Haploreg
rs12129512	chr1	10572961	10572976	LBP-1_3	0.4	Haploreg
rs1314911	chr14	68698226	68698242	Foxj1_2	0.4	Haploreg
rs2162797	chr19	18601017	18601003	E2A_3	0.4	Haploreg
rs28567076	chr22	40984807	40984798	YY1_4	0.5	Haploreg
rs62033399	chr16	53810931	53810947	Barx1	0.5	Haploreg
rs62033399	chr16	53810938	53810954	Pou2f1_10	0.5	Haploreg
rs79994966	chr16	53823739	53823723	Foxl1_1	0.5	Haploreg
rs11836367	chr12	96027450	96027468	Cdx	0.6	Haploreg
rs3751812	chr16	53818449	53818460	Tgif1_1	0.6	Haploreg
rs55760151	chr8	29517845	29517829	Foxl1_1	0.6	Haploreg
rs8050133	chr16	53853216	53853233	E2A_5	0.6	Haploreg
rs8051591	chr16	53816743	53816755	Foxd3	0.6	Haploreg
rs1250006	chr10	80846534	80846511	Pou2f1_4	0.7	Haploreg
rs2162797	chr19	18601020	18601007	MZF1::1-4_2	0.7	Haploreg
rs56313538	chr16	53818853	53818823	Pax-4_4	0.7	Haploreg
rs2619415	chr12	28153749	28153734	STAT_4	0.8	Haploreg
rs62033399	chr16	53810929	53810945	Lhx4	0.8	Haploreg
rs11909473	chr21	16547431	16547448	Zbtb3	0.9	Haploreg
rs12541832	chr8	128353158	128353172	NF-Y_1	0.9	Haploreg
rs55760151	chr8	29517846	29517828	Foxj2_1	0.9	Haploreg
rs62033399	chr16	53810930	53810947	Hoxc6	0.9	Haploreg
rs73167076	chr22	40879841	40879857	Osr	0.9	Haploreg
rs11196200	chr10	114801956	114801938	NR3C_9	1	Haploreg
rs11670392	chr19	18607783	18607766	YY1_1	1	Haploreg
rs1250009	chr10	80845396	80845412	Hoxb13	1	Haploreg
rs34409637	chr14	68719108	68719122	Pou2f1_6	1	Haploreg
rs4252725	chr1	204513257	204513244	CEBPG	1	Haploreg
rs62033399	chr16	53810933	53810945	Nkx6-2	1	Haploreg
rs62033399	chr16	53810938	53810955	Pax7	1	Haploreg
rs9311400	chr3	4764164	4764173	Sox_17	1	Haploreg
rs9935401	chr16	53816837	53816852	HES1	1	Haploreg
rs11646715	chr16	53824022	53824007	Zfp105	1.1	Haploreg
rs17756000	chr14	69019524	69019541	Ascl2	1.1	Haploreg
rs73167093	chr22	40893788	40893803	Pou5f1_2	1.1	Haploreg
rs1250006	chr10	80846511	80846526	Foxa_1	1.2	Haploreg
rs12710697	chr2	19320982	19320968	CEBPA_1	1.2	Haploreg
rs1314911	chr14	68698229	68698242	Foxi1	1.2	Haploreg
rs1314912	chr14	68698371	68698387	Irx	1.2	Haploreg
rs2372092	chr3	30687557	30687545	Mef2_4	1.2	Haploreg
rs62033399	chr16	53810930	53810947	Hoxb4	1.2	Haploreg
rs62366821	chr5	44875451	44875434	Hoxa7_2	1.2	Haploreg
rs805511	chr12	28139719	28139734	Zbtb7b	1.2	Haploreg
rs11646715	chr16	53824022	53824004	Cdx	1.3	Haploreg
rs6999897	chr8	129192697	129192714	GATA_12	1.3	Haploreg
rs6480918	chr10	80836347	80836356	Ik-1_2	1.4	Haploreg
rs73167079	chr22	40883088	40883074	RREB-1_1	1.4	Haploreg
rs1250006	chr10	80846508	80846525	Ncx_2	1.5	Haploreg
rs10087058	chr8	29514545	29514531	p300	1.6	Haploreg
rs10408290	chr19	18542699	18542711	Pbx	1.6	Haploreg
rs11669175	chr19	44289823	44289835	Pbx	1.6	Haploreg
rs11746506	chr5	44812578	44812566	Cdc5	1.6	Haploreg
rs1250006	chr10	80846531	80846510	HNF1_7	1.6	Haploreg
rs2162797	chr19	18601024	18601013	Egr_1	1.6	Haploreg
rs630611	chr9	110925436	110925406	Pax-4_5	1.6	Haploreg
rs7084454	chr10	21821261	21821274	CEBPG	1.6	Haploreg
rs7201850	chr16	53821864	53821851	RORalpha1_1	1.6	Haploreg
rs78694459	chr22	41027349	41027363	Pou2f1_6	1.6	Haploreg
rs11746506	chr5	44812576	44812564	Sox_7	1.7	Haploreg
rs2278238	chr19	18576470	18576484	Pax-6_2	1.7	Haploreg
rs739874	chr14	68974413	68974396	Lhx8	1.7	Haploreg
rs56152647	chr8	129195923	129195901	GATA_9	1.8	Haploreg
rs11642841	chr16	53845489	53845474	PPARG_3	1.9	Haploreg
rs35270244	chr1	204548407	204548419	Myf_1	1.9	Haploreg
rs3810429	chr19	18543271	18543260	Evi-1_5	1.9	Haploreg
rs8054859	chr16	53854691	53854674	Hdx	1.9	Haploreg
rs13081020	chr3	30687968	30687986	Irf_5	2	Haploreg
rs62033399	chr16	53810930	53810944	CHX10	2	Haploreg
rs946711	chr10	21806834	21806818	Pitx3	2	Haploreg
rs12680772	chr8	29502114	29502127	MZF1::1-4_2	2.1	Haploreg
rs4732699	chr8	29521441	29521454	Ik-1_1	2.1	Haploreg
rs7461885	chr8	29529169	29529160	YY1_4	2.1	Haploreg
rs11083720	chr19	44281498	44281478	RREB-1_2	2.2	Haploreg
rs10894076	chr11	129463051	129463063	Foxd3	2.3	Haploreg
rs11684853	chr2	19310901	19310918	Hmx_2	2.3	Haploreg
rs581761	chr8	128345233	128345221	Foxo_3	2.3	Haploreg
rs73169065	chr22	41009704	41009716	HP1-site-factor	2.3	Haploreg
rs2619415	chr12	28153738	28153753	Ets_2	2.4	Haploreg
rs55760151	chr8	29517844	29517831	Foxf1	2.5	Haploreg
rs62116964	chr19	44292001	44291986	Pou2f1_7	2.5	Haploreg
rs946711	chr10	21806836	21806819	Obox3	2.5	Haploreg
rs11049292	chr12	28179469	28179483	AP-2_5	2.6	Haploreg
rs62033399	chr16	53810930	53810947	Pou3f2_4	2.6	Haploreg
rs1249998	chr10	80850756	80850740	Plagl1	2.7	Haploreg
rs6999897	chr8	129192695	129192717	GATA_9	2.7	Haploreg
rs1267206	chr12	28143693	28143713	RREB-1_2	2.8	Haploreg
rs9937053	chr16	53799499	53799515	Hoxc9	3.2	Haploreg
rs11647020	chr16	53823980	53824003	Pou2f1_4	3.3	Haploreg
rs2860197	chr10	123351310	123351289	VDR_4	3.3	Haploreg
rs11628293	chr14	69037308	69037327	NRSF_3	3.7	Haploreg
rs11819695	chr10	5887295	5887273	TCF11::MafG	3.7	Haploreg
rs62033399	chr16	53810939	53810953	Mrg1::Hoxa9_2	3.7	Haploreg
rs424001	chr6	13715988	13716003	Pdx1_2	3.9	Haploreg
rs4951400	chr1	204534565	204534577	Myf_1	3.9	Haploreg
rs13016875	chr2	218294109	218294091	Srf_1	4.3	Haploreg
rs7459709	chr8	29504987	29505006	CTCF	4.5	Haploreg
rs11136084	chr8	29523922	29523908	Pou3f2_2	4.6	Haploreg
rs4256891	chr10	5888054	5888066	Egr_4	4.6	Haploreg
rs13185555	chr5	44690970	44690952	EWSR1-FLI1	5.3	Haploreg
rs11628293	chr14	69037332	69037320	ZNF219	5.6	Haploreg
rs55676236	chr3	27391589	27391611	Mef2_2	6.3	Haploreg
rs595821	chr8	128344416	128344399	Zfp410	6.9	Haploreg
rs10106296	chr8	129205598	129205618	RREB-1_2	8.5	Haploreg
rs62033403	chr16	53822254	53822236	Srf_1	11.3	Haploreg
rs6747315	chr2	19319044	19319065	NRSF_1	12	Haploreg
rs10843066	chr12	28176770	28176790	Foxp1	15.9	Haploreg
rs997199	chr12	28119380	28119389	Myb_2	<-0.4	Haploreg
rs28432761	chr16	53823880	53823872	Foxl1_2	<-0.5	Haploreg
rs62116961	chr19	44283849	44283841	LF-A1	<-0.6	Haploreg
rs10736303	chr10	123334461	123334452	Smad_1	<-0.7	Haploreg
rs11083720	chr19	44281498	44281489	Smad_1	<-0.7	Haploreg
rs11196180	chr10	114748033	114748017	Mef2_1	<-0.7	Haploreg
rs67704568	chr19	44294024	44294008	Mef2_1	<-0.7	Haploreg
rs7077039	chr10	114789082	114789072	GATA_11	<-0.7	Haploreg
rs743605	chr2	172967299	172967308	Ahr::Arnt::HIF1	<-0.7	Haploreg
rs2162797	chr19	18601010	18601019	WT1	<-0.8	Haploreg
rs2092163	chr22	40810227	40810244	LUN-1	<-1	Haploreg
rs55669535	chr22	41012810	41012819	Foxm1	<-1.1	Haploreg
rs73169096	chr22	41027711	41027719	TFE	<-1.1	Haploreg
rs10828266	chr10	22098707	22098697	p53_2	<-1.2	Haploreg
rs11049260	chr12	28145909	28145898	YY1_5	<-1.2	Haploreg
rs13061018	chr3	30676003	30675991	Nkx2_2	<-1.2	Haploreg
rs521667	chr18	24338472	24338482	Gfi1_3	<-1.2	Haploreg
rs676083	chr9	110922097	110922081	Mef2_1	<-1.2	Haploreg
rs10468280	chr16	53827469	53827490	NRSF_1	<-1.3	Haploreg
rs12921970	chr16	53865234	53865224	Gfi1_3	<-1.3	Haploreg
rs62366821	chr5	44875442	44875456	GATA_2	<-1.3	Haploreg
rs6558138	chr8	29529603	29529583	Foxp1	<-1.3	Haploreg
rs73169089	chr22	41024858	41024850	AP-1_3	<-1.3	Haploreg
rs11075993	chr16	53837134	53837144	TBX5_2	<-1.4	Haploreg
rs12680772	chr8	29502115	29502125	MZF1::1-4_3	<-1.4	Haploreg
rs7074440	chr10	114785430	114785419	AP-1_1	<-1.4	Haploreg
rs8066833	chr17	53025482	53025471	Pax-4_2	<-1.4	Haploreg
rs1080321	chr14	68712512	68712521	TFII-I	<-1.5	Haploreg
rs12541832	chr8	128353163	128353173	Gfi1_3	<-1.5	Haploreg
rs4074718	chr10	114748623	114748606	YY1_1	<-1.5	Haploreg
rs554219	chr11	69331636	69331650	Elk1_2	<-1.5	Haploreg
rs646157	chr3	27352152	27352137	TATA_2	<-1.5	Haploreg
rs12232972	chr2	218257260	218257275	Pou3f1	<-1.7	Haploreg
rs57481445	chr2	218296381	218296371	AP-4_2	<-1.7	Haploreg
rs648324	chr1	10556443	10556454	Esr1_2	<-1.7	Haploreg
rs10087058	chr8	29514548	29514539	CAC-binding-protein	<-1.8	Haploreg
rs17817288	chr16	53807771	53807755	Sox_3	<-1.8	Haploreg
rs10956416	chr8	129190284	129190295	Spz1_2	<-1.9	Haploreg
rs12265291	chr10	114810243	114810233	MZF1::1-4_3	<-1.9	Haploreg
rs1786626	chr18	24551487	24551477	Pou1f1_1	<-1.9	Haploreg
rs2737455	chr12	28149611	28149622	Octamer	<-1.9	Haploreg
rs57481445	chr2	218296372	218296380	HEB	<-1.9	Haploreg
rs62033399	chr16	53810949	53810937	Pou2f1_8	<-10.5	Haploreg
rs11049294	chr12	28181405	28181391	RREB-1_1	<-10.6	Haploreg
rs12718338	chr10	114813032	114813053	NRSF_1	<-10.9	Haploreg
rs4077527	chr10	114813032	114813053	NRSF_1	<-10.9	Haploreg
rs56354710	chr8	129199348	129199364	Mef2_1	<-11	Haploreg
rs11960484	chr5	56109164	56109154	Pou3f2_3	<-11.2	Haploreg
rs62033399	chr16	53810948	53810938	Pou3f2_3	<-11.2	Haploreg
rs10090685	chr8	76610352	76610369	Hsf_3	<-11.4	Haploreg
rs7202296	chr16	53821701	53821681	Foxp1	<-11.6	Haploreg
rs10421887	chr19	44294852	44294829	Pou2f1_4	<-2	Haploreg
rs11624097	chr14	68986026	68986043	HNF1_2	<-2	Haploreg
rs1917063	chr6	82323195	82323212	GATA_12	<-2	Haploreg
rs10843061	chr12	28174558	28174575	Rhox11	<-2.1	Haploreg
rs12473807	chr2	218300737	218300719	Cdx	<-2.1	Haploreg
rs1314911	chr14	68698229	68698249	Foxp1	<-2.1	Haploreg
rs6504951	chr17	53056980	53056970	Hand1_2	<-2.1	Haploreg
rs9311400	chr3	4764162	4764179	Hoxa9	<-2.1	Haploreg
rs9923233	chr16	53819186	53819203	Nkx1-1	<-2.1	Haploreg
rs10045264	chr5	44886441	44886429	SREBP_4	<-2.2	Haploreg
rs12149832	chr16	53842916	53842899	XBP-1_1	<-2.2	Haploreg
rs7074440	chr10	114785430	114785419	Bach2	<-2.2	Haploreg
rs7125631	chr11	1948189	1948174	Ets_2	<-2.2	Haploreg
rs73167096	chr22	40894472	40894449	Pou2f1_4	<-2.2	Haploreg
rs739874	chr14	68974415	68974400	Pou3f2_1	<-2.2	Haploreg
rs9311400	chr3	4764162	4764178	Hoxa10	<-2.2	Haploreg
rs9937709	chr16	53820800	53820817	HNF4_4	<-2.2	Haploreg
rs7202116	chr16	53821620	53821604	Foxl1_1	<-2.3	Haploreg
rs73169084	chr22	41022810	41022798	LRH1	<-2.3	Haploreg
rs2042032	chr16	53858572	53858588	Hoxb8	<-2.4	Haploreg
rs34746918	chr19	18539753	18539739	KROX	<-2.4	Haploreg
rs55849114	chr22	40931997	40932012	Sox_18	<-2.4	Haploreg
rs55997921	chr22	41006619	41006609	Nkx2_1	<-2.4	Haploreg
rs56124626	chr22	40907948	40907960	Foxd3	<-2.4	Haploreg
rs7838714	chr8	128343945	128343956	Octamer	<-2.4	Haploreg
rs12155535	chr8	29523497	29523515	HNF1_6	<-2.5	Haploreg
rs1314913	chr14	68699587	68699596	AP-1_2	<-2.5	Haploreg
rs2370959	chr3	27397153	27397141	Nkx2_2	<-2.5	Haploreg
rs73167096	chr22	40894472	40894457	HMG-IY_2	<-2.5	Haploreg
rs7838714	chr8	128343959	128343942	Pou3f3	<-2.5	Haploreg
rs17726078	chr2	172974554	172974571	MafB_2	<-2.6	Haploreg
rs35600848	chr3	30689412	30689426	Zfx	<-2.6	Haploreg
rs424001	chr6	13716005	13715990	MafK	<-2.6	Haploreg
rs4252725	chr1	204513262	204513249	Foxi1	<-2.6	Haploreg
rs56051217	chr22	41049406	41049397	Smad3_1	<-2.6	Haploreg
rs11624164	chr14	68986146	68986159	Egr_3	<-2.7	Haploreg
rs3816835	chr3	4751810	4751780	Pax-4_5	<-2.7	Haploreg
rs660725	chr1	10557554	10557539	Pou3f1	<-2.7	Haploreg
rs662064	chr1	10557244	10557254	AP-4_2	<-2.7	Haploreg
rs11049294	chr12	28181393	28181406	Sp1_3	<-2.8	Haploreg
rs1685191	chr19	44283228	44283240	SREBP_4	<-2.8	Haploreg
rs6470608	chr8	129196556	129196573	Obox3	<-2.8	Haploreg
rs6868779	chr5	44886005	44885993	Cdc5	<-2.8	Haploreg
rs7463114	chr8	29507088	29507099	Tgif1_1	<-2.8	Haploreg
rs7845360	chr8	29505613	29505601	Mrg_1	<-2.8	Haploreg
rs11075991	chr16	53819947	53819934	RORalpha1_1	<-2.9	Haploreg
rs2162797	chr19	18601019	18601011	MAZ	<-2.9	Haploreg
rs35936842	chr10	114818765	114818782	Sp4	<-2.9	Haploreg
rs4074718	chr10	114748607	114748622	Srf_4	<-2.9	Haploreg
rs62501788	chr8	29517012	29516996	Hbp1	<-2.9	Haploreg
rs7465306	chr8	29504922	29504910	Foxo_3	<-2.9	Haploreg
rs11255602	chr10	5903712	5903732	Foxp1	<-3	Haploreg
rs12155535	chr8	29523496	29523517	HNF1_7	<-3	Haploreg
rs1274656	chr14	68679472	68679489	XBP-1_1	<-3	Haploreg
rs4412123	chr5	44876292	44876274	EWSR1-FLI1	<-3	Haploreg
rs73167039	chr22	40833151	40833131	Foxp1	<-3	Haploreg
rs8047587	chr16	53798652	53798622	Pax-4_4	<-3	Haploreg
rs2737455	chr12	28149625	28149608	Pou3f3	<-3.1	Haploreg
rs2737456	chr12	28149626	28149611	Pou5f1_2	<-3.1	Haploreg
rs4233763	chr2	19324041	19324052	LBP-1_1	<-3.1	Haploreg
rs4412123	chr5	44876298	44876286	Elf1	<-3.1	Haploreg
rs17001997	chr22	40905065	40905081	Bcl6b	<-3.2	Haploreg
rs2162797	chr19	18601020	18601007	MAZR	<-3.2	Haploreg
rs424001	chr6	13715998	13715987	Bach2	<-3.2	Haploreg
rs7202116	chr16	53821619	53821607	Foxq1	<-3.2	Haploreg
rs9311400	chr3	4764162	4764179	Hoxd10	<-3.2	Haploreg
rs11049294	chr12	28181409	28181393	Klf7	<-3.3	Haploreg
rs2737455	chr12	28149627	28149605	Pou2f1_9	<-3.3	Haploreg
rs10206829	chr2	19321490	19321500	NF-kappaB_3	<-3.4	Haploreg
rs34409637	chr14	68719105	68719120	Pou5f1_1	<-3.4	Haploreg
rs73169057	chr22	40990959	40990945	NF-Y_1	<-3.4	Haploreg
rs12651949	chr5	44798121	44798107	Pax-6_2	<-3.5	Haploreg
rs17756000	chr14	69019527	69019543	Mrg_2	<-3.5	Haploreg
rs3827382	chr22	40881410	40881392	NR3C_9	<-3.5	Haploreg
rs596537	chr1	10554703	10554715	Hic1_3	<-3.5	Haploreg
rs10408290	chr19	18542697	18542711	UF1H3BETA	<-3.6	Haploreg
rs12473807	chr2	218300713	218300726	Fox	<-3.7	Haploreg
rs11075991	chr16	53819946	53819935	RORalpha1_3	<-3.8	Haploreg
rs7463114	chr8	29507084	29507100	Mrg_2	<-3.8	Haploreg
rs1875028	chr8	129173679	129173669	Olf-1_3	<-3.9	Haploreg
rs11075990	chr16	53819902	53819885	Pou6f1_2	<-4	Haploreg
rs389143	chr8	128344384	128344374	Klf4	<-4	Haploreg
rs4073220	chr8	29502916	29502900	Sox_5	<-4.1	Haploreg
rs1267204	chr12	28143971	28143987	Hoxc10	<-4.2	Haploreg
rs725453	chr14	68675867	68675852	Pou5f1_1	<-4.2	Haploreg
rs11049294	chr12	28181395	28181405	Klf4	<-4.3	Haploreg
rs12609846	chr19	44283449	44283428	NRSF_1	<-4.3	Haploreg
rs11136086	chr8	29524067	29524052	DMRT3	<-4.4	Haploreg
rs10900600	chr1	204559702	204559715	Foxj1_1	<-4.5	Haploreg
rs4866783	chr5	44876514	44876497	Gsc	<-4.7	Haploreg
rs7202116	chr16	53821619	53821606	Foxf1	<-4.7	Haploreg
rs4866783	chr5	44876513	44876497	Pitx3	<-4.8	Haploreg
rs4074718	chr10	114748620	114748608	Srf_5	<-5	Haploreg
rs10843069	chr12	28177645	28177659	Irf_9	<-5.1	Haploreg
rs630611	chr9	110925418	110925404	Mrg1::Hoxa9_1	<-5.2	Haploreg
rs9311400	chr3	4764164	4764178	Cdx2_1	<-5.2	Haploreg
rs56313538	chr16	53818822	53818840	EWSR1-FLI1	<-5.3	Haploreg
rs6480918	chr10	80836359	80836339	znf143	<-5.3	Haploreg
rs74933543	chr14	69047021	69047002	SEF-1	<-5.3	Haploreg
rs7838714	chr8	128343940	128343958	Pou2f1_1	<-5.3	Haploreg
rs12680772	chr8	29502127	29502115	ZNF219	<-5.4	Haploreg
rs17002038	chr22	41000968	41000951	RXR::LXR	<-5.4	Haploreg
rs10442	chr19	18545338	18545352	Pou3f2_2	<-5.8	Haploreg
rs6874055	chr5	44666977	44666959	Cart1	<-5.8	Haploreg
rs28432761	chr16	53823879	53823867	TEF	<-6.1	Haploreg
rs6999897	chr8	129192700	129192718	EWSR1-FLI1	<-6.3	Haploreg
rs7077039	chr10	114789087	114789065	GATA_9	<-6.4	Haploreg
rs62116961	chr19	44283831	44283849	LXR_1	<-6.6	Haploreg
rs552647	chr3	27353731	27353714	LUN-1	<-7	Haploreg
rs7188250	chr16	53834590	53834610	Foxp1	<-7	Haploreg
rs73167096	chr22	40894453	40894473	Foxp1	<-7.2	Haploreg
rs72722756	chr8	129186091	129186111	Foxp1	<-7.5	Haploreg
rs662064	chr1	10557238	10557260	HEN1_1	<-7.6	Haploreg
rs12330423	chr3	4750914	4750932	MIF-1	<-8.1	Haploreg
rs10843066	chr12	28176790	28176802	HNF1_3	<-8.5	Haploreg
rs12680772	chr8	29502110	29502128	EWSR1-FLI1	<-8.7	Haploreg
rs4074718	chr10	114748622	114748604	Srf_1	<-9.2	Haploreg
rs4074720	chr10	114748502	114748493	Evi-1_1	<-9.6	Haploreg
rs1875028	chr8	129173680	129173669	Olf-1_2	<-9.7	Haploreg
rs11049294	chr12	28181406	28181386	RREB-1_2	<-9.9	Haploreg
rs73169084	chr22	41022822	41022799	PPARG_2	<-9.9	Haploreg
rs11684853	chr2	19310896	19310920	Brachyury_1	>0.3	Haploreg
rs12155535	chr8	29523499	29523515	Mef2_1	>0.3	Haploreg
rs12546580	chr8	129180497	129180522	AIRE_2	>0.5	Haploreg
rs4519482	chr2	172963356	172963364	Foxl1_2	>0.5	Haploreg
rs73169097	chr22	41027881	41027863	EWSR1-FLI1	>0.5	Haploreg
rs7845421	chr8	29498396	29498388	BRCA1_1	>0.5	Haploreg
rs8063057	chr16	53812442	53812422	Foxp1	>0.5	Haploreg
rs10413237	chr19	18548241	18548250	AP-2_4	>0.6	Haploreg
rs61013802	chr19	44292139	44292147	NR3C_8	>0.6	Haploreg
rs11196180	chr10	114748031	114748022	CIZ	>0.7	Haploreg
rs17838698	chr3	30684913	30684904	GATA_8	>0.8	Haploreg
rs73169098	chr22	41031028	41031008	Foxp1	>0.8	Haploreg
rs6001950	chr22	40906628	40906640	Ik-2_1	>0.9	Haploreg
rs2042032	chr16	53858577	53858591	CEBP_2	>1	Haploreg
rs6741887	chr2	19320371	19320391	Foxp1	>1	Haploreg
rs12330816	chr3	4750868	4750856	CEBP_4	>1.1	Haploreg
rs62033404	chr16	53822243	53822233	Ebox	>1.1	Haploreg
rs3954757	chr10	5888071	5888061	p53_3	>1.2	Haploreg
rs12330816	chr3	4750860	4750876	Mef2_1	>1.3	Haploreg
rs56313538	chr16	53818829	53818837	MZF1::1-4_1	>1.3	Haploreg
rs4358083	chr2	19323066	19323080	CEBPA_1	>1.4	Haploreg
rs10483205	chr22	40883604	40883595	Pbx-1_1	>1.5	Haploreg
rs12541832	chr8	128353162	128353171	Pbx-1_1	>1.5	Haploreg
rs526631	chr11	65681968	65681953	Hic1_1	>1.5	Haploreg
rs11227309	chr11	65584507	65584523	Dlx5	>1.7	Haploreg
rs11783807	chr8	129194541	129194531	TBX5_2	>1.7	Haploreg
rs12463370	chr19	44292161	44292178	Dbx1	>1.7	Haploreg
rs3935963	chr8	29516517	29516534	Hdx	>1.7	Haploreg
rs11055883	chr12	14412800	14412818	Pax-1	>1.8	Haploreg
rs13004333	chr2	218296136	218296143	PU.1_1	>1.8	Haploreg
rs2385088	chr19	18545535	18545544	CAC-binding-protein	>1.8	Haploreg
rs2618146	chr2	218302020	218302007	AP-2_3	>1.8	Haploreg
rs552647	chr3	27353728	27353709	NR3C_6	>1.8	Haploreg
rs8063057	chr16	53812419	53812437	EWSR1-FLI1	>1.8	Haploreg
rs9930333	chr16	53799970	53799982	Lmo2-complex_1	>1.8	Haploreg
rs9931900	chr16	53818821	53818805	Zfp740	>1.8	Haploreg
rs10408290	chr19	18542698	18542715	Pbx-1_4	>1.9	Haploreg
rs10762841	chr10	80835692	80835682	Olf-1_3	>1.9	Haploreg
rs2619415	chr12	28153739	28153747	FEV	>1.9	Haploreg
rs4358083	chr2	19323066	19323080	CEBP_2	>1.9	Haploreg
rs813722	chr12	28152057	28152041	Mef2_1	>1.9	Haploreg
rs17817712	chr16	53821118	53821136	MIF-1	>10.1	Haploreg
rs3826169	chr16	53860493	53860473	Foxp1	>10.1	Haploreg
rs2619415	chr12	28153737	28153751	Ets_4	>10.2	Haploreg
rs837993	chr9	110924760	110924771	Olf-1_2	>10.7	Haploreg
rs7897260	chr10	5888433	5888420	Hsf_2	>10.9	Haploreg
rs56313538	chr16	53818821	53818837	Maf_1	>11.1	Haploreg
rs1274652	chr14	68676508	68676528	Foxp1	>11.2	Haploreg
rs4951400	chr1	204534578	204534562	Myf_4	>2	Haploreg
rs61013802	chr19	44292130	44292149	NR3C_6	>2	Haploreg
rs8050136	chr16	53816265	53816281	Hoxb8	>2	Haploreg
rs1155706	chr3	30686621	30686637	Hoxa10	>2.1	Haploreg
rs1250009	chr10	80845406	80845422	Foxj1_2	>2.1	Haploreg
rs4358083	chr2	19323068	19323077	CEBPA_2	>2.1	Haploreg
rs5020833	chr3	30670436	30670420	Hand1_1	>2.2	Haploreg
rs521667	chr18	24338487	24338479	CACD_2	>2.2	Haploreg
rs62033399	chr16	53810929	53810945	Msx-1_2	>2.2	Haploreg
rs9308782	chr2	121244801	121244813	GCM	>2.2	Haploreg
rs11646715	chr16	53824024	53824007	Ncx_2	>2.3	Haploreg
rs2588828	chr14	68613476	68613484	Foxo_4	>2.3	Haploreg
rs10894076	chr11	129463047	129463067	Foxp1	>2.4	Haploreg
rs1155706	chr3	30686633	30686616	Hoxd10	>2.4	Haploreg
rs788461	chr12	28150500	28150483	Tcf_2	>2.4	Haploreg
rs11075992	chr16	53820061	53820072	AhR_2	>2.5	Haploreg
rs11075993	chr16	53837155	53837140	Bbx	>2.5	Haploreg
rs12129512	chr1	10572962	10572976	LBP-9	>2.5	Haploreg
rs7725218	chr5	1282419	1282407	Mrg_1	>2.5	Haploreg
rs9937053	chr16	53799495	53799508	RORalpha1_1	>2.5	Haploreg
rs11778142	chr8	129183413	129183423	Nkx2_9	>2.6	Haploreg
rs12155535	chr8	29523502	29523526	Gfi1_1	>2.6	Haploreg
rs4871782	chr8	128352254	128352234	Foxp1	>2.6	Haploreg
rs9972653	chr16	53814364	53814349	Irf_11	>2.6	Haploreg
rs10420384	chr19	18549537	18549551	KROX	>2.7	Haploreg
rs11075985	chr16	53805204	53805214	Nkx2_1	>2.7	Haploreg
rs13081020	chr3	30687957	30687974	MafB_2	>2.7	Haploreg
rs4077527	chr10	114813032	114813049	Zbtb3	>2.7	Haploreg
rs7074440	chr10	114785411	114785427	Eomes	>2.7	Haploreg
rs72997390	chr3	4751047	4751033	Sox_15	>2.7	Haploreg
rs9812100	chr3	4763297	4763307	Tal1	>2.7	Haploreg
rs10447995	chr8	128357911	128357929	Pou1f1_2	>2.8	Haploreg
rs1151523	chr11	65665208	65665190	Myf_3	>2.8	Haploreg
rs61013802	chr19	44292130	44292148	NR3C_9	>2.8	Haploreg
rs6558139	chr8	29530476	29530488	Foxd3	>2.8	Haploreg
rs28759353	chr8	128352375	128352359	Nkx2_11	>2.9	Haploreg
rs56313538	chr16	53818832	53818840	MAZ	>2.9	Haploreg
rs8050136	chr16	53816266	53816282	Hoxa10	>2.9	Haploreg
rs12990503	chr2	218294209	218294224	Obox6	>3	Haploreg
rs13270266	chr8	128354077	128354094	Gm397	>3	Haploreg
rs10956361	chr8	128350111	128350095	Hbp1	>3.1	Haploreg
rs11642841	chr16	53845494	53845475	PPAR_1	>3.1	Haploreg
rs1274652	chr14	68676510	68676525	Pou5f1_2	>3.1	Haploreg
rs525803	chr9	110923871	110923885	HNF1_1	>3.1	Haploreg
rs1267211	chr12	28140838	28140824	E2A_3	>3.2	Haploreg
rs62116961	chr19	44283837	44283849	SREBP_4	>3.2	Haploreg
rs8106096	chr19	18536422	18536408	Zfx	>3.2	Haploreg
rs9931494	chr16	53827172	53827190	Foxj2_1	>3.3	Haploreg
rs554219	chr11	69331641	69331655	PTF1-beta	>3.4	Haploreg
rs7461885	chr8	29529174	29529154	YY1_2	>3.4	Haploreg
rs8050136	chr16	53816265	53816281	Cdx2_2	>3.4	Haploreg
rs9931494	chr16	53827173	53827189	Foxl1_1	>3.4	Haploreg
rs1250006	chr10	80846511	80846524	Nkx6-1_1	>3.5	Haploreg
rs9923312	chr16	53819375	53819363	Mef2_4	>3.5	Haploreg
rs8050136	chr16	53816268	53816282	Cdx2_1	>3.6	Haploreg
rs2737448	chr12	28153264	28153250	FXR_1	>3.7	Haploreg
rs4506565	chr10	114756044	114756032	Gfi1b	>3.7	Haploreg
rs8050133	chr16	53853222	53853244	HEN1_1	>3.7	Haploreg
rs12463370	chr19	44292164	44292184	Foxp1	>3.8	Haploreg
rs4732699	chr8	29521459	29521447	GLI	>3.9	Haploreg
rs11049260	chr12	28145883	28145901	GATA_14	>4	Haploreg
rs2618148	chr2	218304118	218304101	Zbtb3	>4.1	Haploreg
rs4732697	chr8	29519867	29519854	DEC	>4.1	Haploreg
rs62033399	chr16	53810931	53810947	Pou4f3	>4.1	Haploreg
rs62033399	chr16	53810930	53810947	Nkx6-1_2	>4.2	Haploreg
rs9931494	chr16	53827174	53827186	Foxd3	>4.2	Haploreg
rs2619415	chr12	28153735	28153747	Elf1	>4.3	Haploreg
rs62116991	chr19	44303442	44303459	LXR_3	>4.3	Haploreg
rs12155535	chr8	29523508	29523520	Gfi1b	>4.4	Haploreg
rs10420384	chr19	18549538	18549550	Egr_4	>4.5	Haploreg
rs9877680	chr3	4751154	4751171	HNF1_4	>4.5	Haploreg
rs10885402	chr10	114761692	114761707	Mtf1	>4.6	Haploreg
rs113583947	chr14	69041070	69041081	Pitx2	>4.6	Haploreg
rs12330816	chr3	4750875	4750853	Pou2f1_9	>4.6	Haploreg
rs73169060	chr22	40994749	40994738	Pitx2	>4.6	Haploreg
rs11196180	chr10	114748023	114748043	Foxp1	>4.7	Haploreg
rs12680772	chr8	29502109	29502123	BLIMP1	>4.7	Haploreg
rs2588832	chr14	68602758	68602775	Six_1	>4.7	Haploreg
rs7084454	chr10	21821272	21821285	Foxj1_1	>4.7	Haploreg
rs10420384	chr19	18549555	18549538	Sp4	>4.8	Haploreg
rs56092708	chr22	40962816	40962803	DEC	>5.1	Haploreg
rs12710697	chr2	19320980	19320966	NF-Y_1	>5.2	Haploreg
rs6999897	chr8	129192702	129192717	Evi-1_4	>5.2	Haploreg
rs7256530	chr19	18609083	18609107	COMP1	>5.3	Haploreg
rs10843061	chr12	28174556	28174570	Mrg1::Hoxa9_2	>5.7	Haploreg
rs4951400	chr1	204534580	204534558	HEN1_1	>5.9	Haploreg
rs62116991	chr19	44303442	44303458	LXR_2	>6	Haploreg
rs8060823	chr16	53860670	53860646	Brachyury_1	>6.3	Haploreg
rs2385088	chr19	18545527	18545543	CACD_1	>6.4	Haploreg
rs1431131	chr3	30675892	30675874	EWSR1-FLI1	>6.6	Haploreg
rs10894076	chr11	129463071	129463053	Mef2_6	>6.7	Haploreg
rs8043757	chr16	53813458	53813442	Evi-1_2	>6.8	Haploreg
rs9812100	chr3	4763293	4763305	Myf_1	>7	Haploreg
rs4752570	chr10	123337085	123337065	p53_1	>7.1	Haploreg
rs11075992	chr16	53820054	53820072	AhR_1	>7.2	Haploreg
rs16909788	chr12	14410293	14410311	Irf_5	>7.6	Haploreg
rs9931494	chr16	53827174	53827186	Foxq1	>7.6	Haploreg
rs7465364	chr8	29505173	29505154	NRSF_3	>7.7	Haploreg
rs11624097	chr14	68986052	68986035	Foxp3	>8.1	Haploreg
rs4752537	chr10	123092915	123092930	CREB_3	>8.6	Haploreg
rs12546747	chr8	29527329	29527343	Pou2f1_5	>9	Haploreg
rs1553113	chr5	58338442	58338430	Egr_4	>9	Haploreg
rs637571	chr11	65664341	65664355	PLAG1	>9.5	Haploreg
rs743605	chr2	172967312	172967292	RREB-1_2	>9.8	Haploreg
rs11088299	chr21	16536764	16536747	EWSR1-FLI1	-15.3651	JASPARCORE_FIMO
rs11642841	chr16	53845495	53845478	EWSR1-FLI1	-14.5094	JASPARCORE_FIMO
rs56051217	chr22	41049412	41049395	EWSR1-FLI1	-14.5094	JASPARCORE_FIMO
rs56051217	chr22	41049411	41049394	EWSR1-FLI1	-10.4755	JASPARCORE_FIMO
rs6999897	chr8	129192701	129192718	EWSR1-FLI1	-6.31927	JASPARCORE_FIMO
rs11629070	chr14	69042984	69043000	NR1H2::RXRA	-6.29147	JASPARCORE_FIMO
rs12680772	chr8	29502111	29502128	EWSR1-FLI1	-3.26325	JASPARCORE_FIMO
rs2288428	chr19	18544462	18544475	PLAG1	4.34625	JASPARCORE_FIMO
rs10416993	chr19	18600463	18600450	PLAG1	4.53987	JASPARCORE_FIMO
rs704012	chr10	80839044	80839030	Zfp423	5.2715	JASPARCORE_FIMO
rs1875028	chr8	129173681	129173667	Zfp423	5.58814	JASPARCORE_FIMO
rs33321	chr5	56206069	56206083	Zfp423	5.58814	JASPARCORE_FIMO
rs7463114	chr8	29507087	29507097	T	5.73667	JASPARCORE_FIMO
rs805511	chr12	28139742	28139728	RXRA::VDR	6.18534	JASPARCORE_FIMO
rs637571	chr11	65664342	65664355	PLAG1	6.37932	JASPARCORE_FIMO
rs637571	chr11	65664356	65664337	RREB1	6.53341	JASPARCORE_FIMO
rs9936112	chr16	53862376	53862363	PLAG1	7.63788	JASPARCORE_FIMO
rs687324	chr8	128344586	128344597	TEAD1	8.12043	JASPARCORE_FIMO
rs7461959	chr8	29505302	29505320	CTCF	8.12845	JASPARCORE_FIMO
rs9937354	chr16	53799857	53799838	RREB1	8.14835	JASPARCORE_FIMO
rs35270244	chr1	204548410	204548421	Myf	8.20517	JASPARCORE_FIMO
rs35270244	chr1	204548413	204548424	Myf	8.20517	JASPARCORE_FIMO
rs11096582	chr2	19318498	19318487	TEAD1	8.39335	JASPARCORE_FIMO
rs74933543	chr14	69047011	69046998	TLX1::NFIC	8.49472	JASPARCORE_FIMO
rs13100576	chr3	30687706	30687717	TEAD1	8.57529	JASPARCORE_FIMO
rs2647256	chr4	106201549	106201560	SRF	8.87692	JASPARCORE_FIMO
rs6999897	chr8	129192712	129192703	Hltf	8.90895	JASPARCORE_FIMO
rs28432761	chr16	53823872	53823879	FOXL1	8.946	JASPARCORE_FIMO
rs10411009	chr19	18606266	18606272	BRCA1	9.01131	JASPARCORE_FIMO
rs13093591	chr3	30682942	30682952	NFKB1	9.14761	JASPARCORE_FIMO
rs71423318	chr14	69005886	69005896	NFKB1	9.14761	JASPARCORE_FIMO
rs1080321	chr14	68712526	68712513	NR2F1	9.23961	JASPARCORE_FIMO
rs4439916	chr2	19314214	19314203	IRF1	9.28249	JASPARCORE_FIMO
rs9974193	chr21	16529027	16529040	STAT1	9.3577	JASPARCORE_FIMO
rs1274653	chr14	68676778	68676787	RELA	9.61858	JASPARCORE_FIMO
rs672888	chr8	128345456	128345467	IRF1	9.76655	JASPARCORE_FIMO
rs10885409	chr10	114808064	114808078	Pou5f1	9.81235	JASPARCORE_FIMO
rs4808134	chr19	18608575	18608589	Pou5f1	9.89182	JASPARCORE_FIMO
rs9923295	chr16	53861921	53861931	Egr1	9.90223	JASPARCORE_FIMO
rs10442	chr19	18545346	18545337	MEF2A	9.96245	JASPARCORE_FIMO
rs739874	chr14	68974414	68974403	HNF1B	9.98556	JASPARCORE_FIMO
rs10212373	chr3	4762455	4762448	E2F1	10.0368	JASPARCORE_FIMO
rs12491780	chr3	30675046	30675059	PLAG1	10.0582	JASPARCORE_FIMO
rs17726078	chr2	172974561	172974568	Mafb	10.07	JASPARCORE_FIMO
rs56103707	chr19	44304185	44304192	Mafb	10.07	JASPARCORE_FIMO
rs17002036	chr22	40997106	40997117	HNF1B	10.0707	JASPARCORE_FIMO
rs17221259	chr12	14410481	14410492	INSM1	10.0855	JASPARCORE_FIMO
rs251955	chr12	28143467	28143454	Pax6	10.1001	JASPARCORE_FIMO
rs9420318	chr10	123093175	123093186	Esrrb	10.1061	JASPARCORE_FIMO
rs33319	chr5	56206683	56206675	Nkx3-2	10.1134	JASPARCORE_FIMO
rs12680772	chr8	29502114	29502123	Klf4	10.1295	JASPARCORE_FIMO
rs12491780	chr3	30675050	30675063	Zfx	10.152	JASPARCORE_FIMO
rs73169017	chr22	40936279	40936292	Zfx	10.152	JASPARCORE_FIMO
rs9931900	chr16	53818805	53818815	Egr1	10.1848	JASPARCORE_FIMO
rs2767365	chr14	68607026	68607017	Stat3	10.2372	JASPARCORE_FIMO
rs71423318	chr14	69005896	69005887	RELA	10.2963	JASPARCORE_FIMO
rs7206790	chr16	53797918	53797907	IRF1	10.3474	JASPARCORE_FIMO
rs660725	chr1	10557244	10557255	NHLH1	10.3824	JASPARCORE_FIMO
rs725453	chr14	68675867	68675853	Pou5f1	10.4481	JASPARCORE_FIMO
rs4802200	chr19	44289516	44289525	Klf4	10.5169	JASPARCORE_FIMO
rs1316014	chr14	68699374	68699367	Mafb	10.5409	JASPARCORE_FIMO
rs16857611	chr2	218296724	218296734	Egr1	10.5615	JASPARCORE_FIMO
rs10808567	chr8	129192961	129192970	GABPA	10.5989	JASPARCORE_FIMO
rs10413237	chr19	18548245	18548258	Tcfcp2l1	10.6038	JASPARCORE_FIMO
rs7254249	chr19	18591738	18591751	Tcfcp2l1	10.6038	JASPARCORE_FIMO
rs2385088	chr19	18545544	18545535	SP1	10.6068	JASPARCORE_FIMO
rs2303697	chr19	18546686	18546671	NFYA	10.6245	JASPARCORE_FIMO
rs4074718	chr10	114748608	114748617	MEF2A	10.6317	JASPARCORE_FIMO
rs11049293	chr12	28179692	28179703	Esrrb	10.6461	JASPARCORE_FIMO
rs13248140	chr8	128349896	128349886	Egr1	10.6557	JASPARCORE_FIMO
rs554219	chr11	69331638	69331647	ELK1	10.6618	JASPARCORE_FIMO
rs4951400	chr1	204534577	204534566	Myf	10.6782	JASPARCORE_FIMO
rs2162797	chr19	18601016	18601007	MZF1_5-13	10.697	JASPARCORE_FIMO
rs12680772	chr8	29502122	29502113	SP1	10.7132	JASPARCORE_FIMO
rs2162797	chr19	18601016	18601025	SP1	10.7132	JASPARCORE_FIMO
rs4980021	chr10	80834569	80834556	Zfx	10.7285	JASPARCORE_FIMO
rs8106096	chr19	18536420	18536412	TFAP2A	10.7297	JASPARCORE_FIMO
rs9940128	chr16	53800756	53800748	ELK4	10.7375	JASPARCORE_FIMO
rs73169084	chr22	41022797	41022808	Esrrb	10.7541	JASPARCORE_FIMO
rs9308782	chr2	121244809	121244800	REL	10.7552	JASPARCORE_FIMO
rs4358083	chr2	19323077	19323066	Cebpa	10.7897	JASPARCORE_FIMO
rs11684853	chr2	19310926	19310917	NF-kappaB	10.8114	JASPARCORE_FIMO
rs7825555	chr8	129186258	129186266	Nkx3-2	10.8201	JASPARCORE_FIMO
rs1146182	chr1	114196881	114196892	Esrrb	10.8621	JASPARCORE_FIMO
rs12491780	chr3	30675058	30675048	RUNX1	10.8702	JASPARCORE_FIMO
rs17817964	chr16	53828061	53828069	CEBPA	10.8943	JASPARCORE_FIMO
rs1951631	chr14	68717528	68717537	GABPA	10.9318	JASPARCORE_FIMO
rs7125631	chr11	1948188	1948179	GABPA	10.9318	JASPARCORE_FIMO
rs788463	chr12	28152658	28152647	Cebpa	10.9781	JASPARCORE_FIMO
rs11599804	chr10	123340658	123340666	TFAP2A	10.9905	JASPARCORE_FIMO
rs74933543	chr14	69047009	69047001	TFAP2A	10.9905	JASPARCORE_FIMO
rs8106096	chr19	18536411	18536419	TFAP2A	10.9905	JASPARCORE_FIMO
rs73169057	chr22	40990958	40990943	NFYA	10.9956	JASPARCORE_FIMO
rs10843071	chr12	28178771	28178760	Ddit3::Cebpa	10.9974	JASPARCORE_FIMO
rs182819104	chr22	41013226	41013217	SP1	11.0324	JASPARCORE_FIMO
rs204243	chr6	13729043	13729032	TAL1::TCF3	11.0346	JASPARCORE_FIMO
rs2588830	chr14	68607015	68607029	STAT1	11.0641	JASPARCORE_FIMO
rs73167072	chr22	40879112	40879099	Tcfcp2l1	11.0648	JASPARCORE_FIMO
rs13083158	chr3	30675957	30675966	Klf4	11.0686	JASPARCORE_FIMO
rs9877680	chr3	4751162	4751151	Esrrb	11.0781	JASPARCORE_FIMO
rs10090685	chr8	76610356	76610365	Gfi	11.106	JASPARCORE_FIMO
rs7136795	chr12	115813611	115813603	TFAP2A	11.1209	JASPARCORE_FIMO
rs11879757	chr19	18570632	18570623	SP1	11.137	JASPARCORE_FIMO
rs11819695	chr10	5887289	5887279	NFE2L2	11.1898	JASPARCORE_FIMO
rs10483813	chr14	69031294	69031284	RUNX1	11.1992	JASPARCORE_FIMO
rs12680772	chr8	29502130	29502111	znf143	11.2199	JASPARCORE_FIMO
rs10087058	chr8	29514547	29514538	SP1	11.2221	JASPARCORE_FIMO
rs62485509	chr8	129194010	129194001	SP1	11.2221	JASPARCORE_FIMO
rs62485509	chr7	144048907	144048898	MAX	11.2513	JASPARCORE_FIMO
rs11673604	chr19	18540993	18540987	SPIB	11.288	JASPARCORE_FIMO
rs11200014	chr10	123334921	123334930	Klf4	11.2892	JASPARCORE_FIMO
rs12680772	chr8	29502112	29502121	Klf4	11.2892	JASPARCORE_FIMO
rs9923147	chr16	53801547	53801556	EBF1	11.2922	JASPARCORE_FIMO
rs4128597	chr10	114786154	114786147	CREB1	11.3326	JASPARCORE_FIMO
rs648324	chr1	10556443	10556450	CREB1	11.3326	JASPARCORE_FIMO
rs12129512	chr1	10572976	10572963	Tcfcp2l1	11.3414	JASPARCORE_FIMO
rs16902715	chr8	129203856	129203867	FOXI1	11.3422	JASPARCORE_FIMO
rs34746918	chr19	18539738	18539747	SP1	11.3516	JASPARCORE_FIMO
rs704012	chr10	80839033	80839042	EBF1	11.3938	JASPARCORE_FIMO
rs76969790	chr5	58395672	58395683	NHLH1	11.3939	JASPARCORE_FIMO
rs150460514	chr12	14415379	14415389	Spz1	11.3946	JASPARCORE_FIMO
rs4951400	chr1	204524472	204524482	Spz1	11.3946	JASPARCORE_FIMO
rs17726078	chr2	172974573	172974564	Myc	11.404	JASPARCORE_FIMO
rs1951631	chr14	68717537	68717523	STAT1	11.4734	JASPARCORE_FIMO
rs9940128	chr16	53800758	53800749	ELK1	11.4831	JASPARCORE_FIMO
rs1316118	chr14	68700089	68700098	Hand1::Tcfe2a	11.4992	JASPARCORE_FIMO
rs2288428	chr19	18544466	18544475	SP1	11.5626	JASPARCORE_FIMO
rs17817964	chr16	53828072	53828064	Sox17	11.566	JASPARCORE_FIMO
rs7077247	chr10	114812081	114812070	PBX1	11.5804	JASPARCORE_FIMO
rs11665924	chr19	44286982	44286992	NFE2L2	11.5831	JASPARCORE_FIMO
rs12265291	chr10	114810244	114810233	INSM1	11.5999	JASPARCORE_FIMO
rs1314084	chr12	28140282	28140274	TFAP2A	11.6426	JASPARCORE_FIMO
rs8111664	chr19	44295095	44295087	TFAP2A	11.6426	JASPARCORE_FIMO
rs2981578	chr10	123340317	123340307	RUNX1	11.6464	JASPARCORE_FIMO
rs73169057	chr22	40990953	40990944	Gfi	11.6665	JASPARCORE_FIMO
rs56313538	chr16	53818841	53818832	SP1	11.6708	JASPARCORE_FIMO
rs12149574	chr16	53840525	53840535	RUNX1	11.6927	JASPARCORE_FIMO
rs58943232	chr3	27392102	27392089	Pax6	11.7278	JASPARCORE_FIMO
rs17726078	chr2	172974563	172974572	MAX	11.7312	JASPARCORE_FIMO
rs11917237	chr3	30687040	30687021	ESR1	11.7476	JASPARCORE_FIMO
rs7202296	chr16	53821696	53821685	Foxa2	11.7515	JASPARCORE_FIMO
rs2823107	chr21	16535533	16535540	Nobox	11.7547	JASPARCORE_FIMO
rs3010071	chr1	202190778	202190788	Gata1	11.7569	JASPARCORE_FIMO
rs10045264	chr5	44886440	44886431	SP1	11.7772	JASPARCORE_FIMO
rs1314913	chr14	68699596	68699589	Fos	11.7793	JASPARCORE_FIMO
rs9930397	chr16	53799980	53799990	NFE2L2	11.7798	JASPARCORE_FIMO
rs35936842	chr10	114818778	114818769	SP1	11.8181	JASPARCORE_FIMO
rs10843061	chr12	28174566	28174579	HNF1A	11.8216	JASPARCORE_FIMO
rs7465306	chr8	29504910	29504917	FOXO3	11.8355	JASPARCORE_FIMO
rs6558137	chr8	29527647	29527656	SP1	11.9032	JASPARCORE_FIMO
rs3010071	chr1	202190777	202190790	FOXF2	11.9246	JASPARCORE_FIMO
rs7202116	chr16	53821618	53821608	Foxq1	11.9552	JASPARCORE_FIMO
rs4439916	chr2	19314202	19314195	Fos	11.9729	JASPARCORE_FIMO
rs4519482	chr2	172963352	172963359	Fos	11.9729	JASPARCORE_FIMO
rs12680857	chr8	29502626	29502635	Klf4	11.9846	JASPARCORE_FIMO
rs11049294	chr12	28181404	28181395	SP1	11.99	JASPARCORE_FIMO
rs11879798	chr19	44281906	44281897	SP1	11.99	JASPARCORE_FIMO
rs4918788	chr10	114820962	114820953	SP1	11.99	JASPARCORE_FIMO
rs10206829	chr2	19321509	19321500	REL	11.9917	JASPARCORE_FIMO
rs141597790	chr22	40994998	40994989	REL	11.9917	JASPARCORE_FIMO
rs6992491	chr8	129197898	129197904	AP1	12.0319	JASPARCORE_FIMO
rs7074440	chr10	114785427	114785421	AP1	12.0319	JASPARCORE_FIMO
rs73169089	chr22	41024856	41024850	AP1	12.0319	JASPARCORE_FIMO
rs73169089	chr22	41024856	41024850	AP1	12.0319	JASPARCORE_FIMO
rs4074720	chr10	114748504	114748491	Evi1	12.0655	JASPARCORE_FIMO
rs7077039	chr10	114789081	114789071	Gata1	12.1065	JASPARCORE_FIMO
rs17817964	chr16	53828061	53828072	Cebpa	12.1083	JASPARCORE_FIMO
rs12921970	chr16	53865233	53865224	Gfi	12.1149	JASPARCORE_FIMO
rs61132534	chr3	30689201	30689191	NFKB1	12.1488	JASPARCORE_FIMO
rs2278238	chr19	18576483	18576477	NFATC2	12.1547	JASPARCORE_FIMO
rs4252725	chr1	204513261	204513250	FOXI1	12.1567	JASPARCORE_FIMO
rs2288428	chr19	18544458	18544467	SP1	12.1586	JASPARCORE_FIMO
rs7254249	chr19	18591745	18591736	SP1	12.1586	JASPARCORE_FIMO
rs8111664	chr19	44295085	44295098	Zfx	12.1699	JASPARCORE_FIMO
rs662064	chr1	10557255	10557244	NHLH1	12.1805	JASPARCORE_FIMO
rs12495646	chr3	30679967	30679976	EBF1	12.2062	JASPARCORE_FIMO
rs56124626	chr22	40907949	40907960	Foxd3	12.2328	JASPARCORE_FIMO
rs4519482	chr2	172963363	172963357	NKX3-1	12.2428	JASPARCORE_FIMO
rs1951631	chr14	68717526	68717535	Stat3	12.3023	JASPARCORE_FIMO
rs9923295	chr16	53861929	53861920	EBF1	12.3077	JASPARCORE_FIMO
rs12680772	chr8	29502124	29502115	SP1	12.3092	JASPARCORE_FIMO
rs11049293	chr12	28179697	28179704	NR4A2	12.3145	JASPARCORE_FIMO
rs521667	chr18	24338473	24338482	Gfi	12.3391	JASPARCORE_FIMO
rs4252725	chr1	204513261	204513251	Foxq1	12.3424	JASPARCORE_FIMO
rs56124626	chr22	40907949	40907960	Foxa2	12.3974	JASPARCORE_FIMO
rs646157	chr3	27352151	27352137	TBP	12.399	JASPARCORE_FIMO
rs17001997	chr22	40905073	40905079	SPI1	12.4015	JASPARCORE_FIMO
rs646157	chr3	27352151	27352137	TBP	12.4029	JASPARCORE_FIMO
rs56124626	chr22	40907949	40907960	FOXI1	12.4621	JASPARCORE_FIMO
rs62485509	chr7	144048897	144048906	Myc	12.4668	JASPARCORE_FIMO
rs8051591	chr16	53816744	53816755	Foxa2	12.4897	JASPARCORE_FIMO
rs837993	chr9	110924763	110924772	EBF1	12.5108	JASPARCORE_FIMO
rs79994966	chr16	53823737	53823726	FOXI1	12.5639	JASPARCORE_FIMO
rs997199	chr12	28119382	28119389	Myb	12.5971	JASPARCORE_FIMO
rs4074718	chr10	114748619	114748608	SRF	12.7276	JASPARCORE_FIMO
rs112880707	chr22	40884664	40884654	Spz1	12.7404	JASPARCORE_FIMO
rs12404974	chr1	204465484	204465494	Spz1	12.7404	JASPARCORE_FIMO
rs6001949	chr22	40904478	40904491	Zfx	12.7464	JASPARCORE_FIMO
rs7074440	chr10	114785428	114785421	Fos	12.7474	JASPARCORE_FIMO
rs62485509	chr7	144048896	144048905	MAX	12.7871	JASPARCORE_FIMO
rs34746918	chr19	18539752	18539741	INSM1	12.8114	JASPARCORE_FIMO
rs11075991	chr16	53819944	53819935	RORA_1	12.8155	JASPARCORE_FIMO
rs35936842	chr10	114818774	114818767	Myb	12.8202	JASPARCORE_FIMO
rs7251653	chr19	18608287	18608277	RUNX1	12.8442	JASPARCORE_FIMO
rs11136084	chr8	29523912	29523901	HNF1B	12.8802	JASPARCORE_FIMO
rs12541832	chr8	128353164	128353173	Gfi	12.8997	JASPARCORE_FIMO
rs2162797	chr19	18601011	18601020	SP1	12.9475	JASPARCORE_FIMO
rs67397162	chr8	129194019	129194010	Hand1::Tcfe2a	12.9508	JASPARCORE_FIMO
rs13093591	chr3	30682941	30682951	NFKB1	13.0201	JASPARCORE_FIMO
rs62485509	chr7	144048904	144048898	USF1	13.0387	JASPARCORE_FIMO
rs62485509	chr7	144048899	144048905	USF1	13.0387	JASPARCORE_FIMO
rs12116645	chr1	204524475	204524466	SP1	13.0539	JASPARCORE_FIMO
rs7202116	chr16	53821618	53821607	FOXI1	13.0729	JASPARCORE_FIMO
rs62485509	chr7	144048907	144048897	MYC::MAX	13.1838	JASPARCORE_FIMO
rs67397162	chr8	129194003	129194016	Tcfcp2l1	13.1854	JASPARCORE_FIMO
rs4849883	chr2	121244903	121244913	Egr1	13.1987	JASPARCORE_FIMO
rs12265291	chr10	114810242	114810233	MZF1_5-13	13.24	JASPARCORE_FIMO
rs12680772	chr8	29502116	29502125	MZF1_5-13	13.24	JASPARCORE_FIMO
rs1314919	chr14	68711982	68711973	MZF1_5-13	13.24	JASPARCORE_FIMO
rs2162797	chr19	18601018	18601009	Klf4	13.2539	JASPARCORE_FIMO
rs11075993	chr16	53837149	53837138	Ddit3::Cebpa	13.2567	JASPARCORE_FIMO
rs62485509	chr7	144048897	144048906	Mycn	13.2701	JASPARCORE_FIMO
rs61132534	chr3	30689191	30689201	NFKB1	13.3106	JASPARCORE_FIMO
rs7074440	chr10	114785420	114785427	Fos	13.3283	JASPARCORE_FIMO
rs73169097	chr22	41027870	41027879	SP1	13.3731	JASPARCORE_FIMO
rs554219	chr11	69331640	69331648	ELK4	13.4908	JASPARCORE_FIMO
rs6999897	chr8	129192701	129192711	Gata1	13.5045	JASPARCORE_FIMO
rs6504951	chr17	53056979	53056970	Hand1::Tcfe2a	13.6766	JASPARCORE_FIMO
rs71423318	chr14	69005896	69005886	NFKB1	13.6978	JASPARCORE_FIMO
rs521667	chr18	24338470	24338489	RREB1	13.9801	JASPARCORE_FIMO
rs10956416	chr8	129190295	129190285	Spz1	13.9964	JASPARCORE_FIMO
rs62485509	chr7	144048906	144048897	Myc	14.0609	JASPARCORE_FIMO
rs10206829	chr2	19321509	19321500	RELA	14.072	JASPARCORE_FIMO
rs141597790	chr22	40994998	40994989	RELA	14.072	JASPARCORE_FIMO
rs72831295	chr17	53043795	53043804	SP1	14.1167	JASPARCORE_FIMO
rs62485509	chr7	144048906	144048897	Mycn	14.1258	JASPARCORE_FIMO
rs8051591	chr16	53816744	53816754	Foxq1	14.1819	JASPARCORE_FIMO
rs8051591	chr16	53816744	53816755	Foxd3	15.1392	JASPARCORE_FIMO
rs10843066	chr12	28176791	28176802	HNF1B	15.2639	JASPARCORE_FIMO
rs2480785	chr1	10569249	10569262	Zfx	15.3408	JASPARCORE_FIMO
rs35600848	chr3	30689413	30689426	Zfx	15.3408	JASPARCORE_FIMO
rs55929956	chr8	129199253	129199266	Zfx	15.3408	JASPARCORE_FIMO
rs9936112	chr16	53862363	53862376	Zfx	15.3408	JASPARCORE_FIMO
rs1875028	chr8	129173669	129173678	EBF1	15.9634	JASPARCORE_FIMO
rs389143	chr8	128344383	128344374	Klf4	16.3782	JASPARCORE_FIMO
rs704012	chr10	80839045	80839031	Zfp423	16.5653	JASPARCORE_FIMO
rs11049294	chr12	28181396	28181405	Klf4	16.6711	JASPARCORE_FIMO
rs2162797	chr19	18601010	18601019	SP1	16.9906	JASPARCORE_FIMO
rs10843061	chr12	28174578	28174567	HNF1B	18.0734	JASPARCORE_FIMO
rs11075991	chr16	53819947	53819934	RORA_2	19.0439	JASPARCORE_FIMO
rs7821288	chr8	29504231	29504248	EWSR1-FLI1	23.8742	JASPARCORE_FIMO
rs6558136	chr8	29523129	29523140	c-Myc	0.76	Transfac_ChIPSite
rs6558136	chr8	29523129	29523140	c-Myc	0.76	Transfac_ChIPSite
rs6558136	chr8	29523129	29523140	c-Myc	0.76	Transfac_ChIPSite
rs6558136	chr8	29523129	29523140	c-Myc	0.76	Transfac_ChIPSite
rs11075987	chr16	53815143	53815163	Stat1	0.792	Transfac_ChIPSite
rs28375303	chr19	18530144	18530163	CTCF	0.817	Transfac_ChIPSite
rs8103622	chr19	18572832	18572851	CTCF	0.887	Transfac_ChIPSite
rs8103622	chr19	18572832	18572851	CTCF	0.887	Transfac_ChIPSite
rs867052	chr10	5887190	5887203	Max	0.949	Transfac_ChIPSite
rs1685191	chr19	44283235	44283250	RPC155	0.971	Transfac_ChIPSite
rs1314913	chr14	68699590	68699601	c-Fos	0.982	Transfac_ChIPSite
rs1314913	chr14	68699590	68699601	c-Jun	0.982	Transfac_ChIPSite
rs6557160	chr6	151949571	151949582	c-Jun	0.982	Transfac_ChIPSite
rs1499364	chr8	129179935	129179948	HNF4A	0.989	Transfac_ChIPSite
