# Supplementary material for: Comprehensive Functional Annotation of Seventy-One Breast Cancer Risk Loci
Source: PLoS One. 2013 May 22;8(5):e63925. doi: 10.1371/journal.pone.0063925 (PMC3661550; doi:10.1371/journal.pone.0063925)
Supplement: Table S15 — lncRNA which intersect with high LD SNPs in regulatory elements. (XLS) [file pone.0063925.s021.xls]

## Sheet: Sheet1
Table S15. lncRNA which intersect with high LD SNPs in regulatory elements.
corr.snp.id	chr	corr.snp.position	Inc.start	Inc.end	IncRNA.name
rs11684853	chr2	19310918	19244621	19546509	lnc-OSR1-3:1
rs11684853	chr2	19310918	19226414	19505798	lnc-OSR1-3:2
rs11684853	chr2	19310918	19203706	19505815	lnc-OSR1-3:3
rs11675359	chr2	19311124	19244621	19546509	lnc-OSR1-3:1
rs11675359	chr2	19311124	19226414	19505798	lnc-OSR1-3:2
rs11675359	chr2	19311124	19203706	19505815	lnc-OSR1-3:3
rs4439916	chr2	19314204	19244621	19546509	lnc-OSR1-3:1
rs4439916	chr2	19314204	19226414	19505798	lnc-OSR1-3:2
rs4439916	chr2	19314204	19203706	19505815	lnc-OSR1-3:3
rs11096582	chr2	19318492	19244621	19546509	lnc-OSR1-3:1
rs11096582	chr2	19318492	19226414	19505798	lnc-OSR1-3:2
rs11096582	chr2	19318492	19203706	19505815	lnc-OSR1-3:3
rs6747315	chr2	19319060	19244621	19546509	lnc-OSR1-3:1
rs6747315	chr2	19319060	19226414	19505798	lnc-OSR1-3:2
rs6747315	chr2	19319060	19203706	19505815	lnc-OSR1-3:3
rs4322801	chr2	19319834	19244621	19546509	lnc-OSR1-3:1
rs4322801	chr2	19319834	19226414	19505798	lnc-OSR1-3:2
rs4322801	chr2	19319834	19203706	19505815	lnc-OSR1-3:3
rs4425044	chr2	19319977	19244621	19546509	lnc-OSR1-3:1
rs4425044	chr2	19319977	19226414	19505798	lnc-OSR1-3:2
rs4425044	chr2	19319977	19203706	19505815	lnc-OSR1-3:3
rs6741887	chr2	19320383	19244621	19546509	lnc-OSR1-3:1
rs6741887	chr2	19320383	19226414	19505798	lnc-OSR1-3:2
rs6741887	chr2	19320383	19203706	19505815	lnc-OSR1-3:3
rs12710697	chr2	19320968	19244621	19546509	lnc-OSR1-3:1
rs12710697	chr2	19320968	19226414	19505798	lnc-OSR1-3:2
rs12710697	chr2	19320968	19203706	19505815	lnc-OSR1-3:3
rs10206829	chr2	19321500	19244621	19546509	lnc-OSR1-3:1
rs10206829	chr2	19321500	19226414	19505798	lnc-OSR1-3:2
rs10206829	chr2	19321500	19203706	19505815	lnc-OSR1-3:3
rs6731836	chr2	19322004	19244621	19546509	lnc-OSR1-3:1
rs6731836	chr2	19322004	19226414	19505798	lnc-OSR1-3:2
rs6731836	chr2	19322004	19203706	19505815	lnc-OSR1-3:3
rs13420196	chr2	19322818	19244621	19546509	lnc-OSR1-3:1
rs13420196	chr2	19322818	19226414	19505798	lnc-OSR1-3:2
rs13420196	chr2	19322818	19203706	19505815	lnc-OSR1-3:3
rs4358083	chr2	19323073	19244621	19546509	lnc-OSR1-3:1
rs4358083	chr2	19323073	19226414	19505798	lnc-OSR1-3:2
rs4358083	chr2	19323073	19203706	19505815	lnc-OSR1-3:3
rs4233763	chr2	19324049	19244621	19546509	lnc-OSR1-3:1
rs4233763	chr2	19324049	19226414	19505798	lnc-OSR1-3:2
rs4233763	chr2	19324049	19203706	19505815	lnc-OSR1-3:3
rs4233764	chr2	19324055	19244621	19546509	lnc-OSR1-3:1
rs4233764	chr2	19324055	19226414	19505798	lnc-OSR1-3:2
rs4233764	chr2	19324055	19203706	19505815	lnc-OSR1-3:3
rs77283072	chr9	22060833	21994788	22121096	lnc-MTAP-1:1
rs10483205	chr22	40883599	40806304	41188085	lnc-MCHR1-1:1
rs112880707	chr22	40884662	40806304	41188085	lnc-MCHR1-1:1
rs117669949	chr22	41026785	40806304	41188085	lnc-MCHR1-1:1
rs12158872	chr22	40832501	40806304	41188085	lnc-MCHR1-1:1
rs138175438	chr22	40893910	40806304	41188085	lnc-MCHR1-1:1
rs139903991	chr22	40924662	40806304	41188085	lnc-MCHR1-1:1
rs141597790	chr22	40994998	40806304	41188085	lnc-MCHR1-1:1
rs142127948	chr22	40995290	40806304	41188085	lnc-MCHR1-1:1
rs147759720	chr22	40935623	40806304	41188085	lnc-MCHR1-1:1
rs16985899	chr22	40963402	40806304	41188085	lnc-MCHR1-1:1
rs17001974	chr22	40877384	40806304	41188085	lnc-MCHR1-1:1
rs17001977	chr22	40880213	40806304	41188085	lnc-MCHR1-1:1
rs17001997	chr22	40905072	40806304	41188085	lnc-MCHR1-1:1
rs17002019	chr22	40965336	40806304	41188085	lnc-MCHR1-1:1
rs17002020	chr22	40965443	40806304	41188085	lnc-MCHR1-1:1
rs17002026	chr22	40982581	40806304	41188085	lnc-MCHR1-1:1
rs17002027	chr22	40984571	40806304	41188085	lnc-MCHR1-1:1
rs17002030	chr22	40989374	40806304	41188085	lnc-MCHR1-1:1
rs17002034	chr22	40996367	40806304	41188085	lnc-MCHR1-1:1
rs17002036	chr22	40997111	40806304	41188085	lnc-MCHR1-1:1
rs17002038	chr22	41000964	40806304	41188085	lnc-MCHR1-1:1
rs182819104	chr22	41013223	40806304	41188085	lnc-MCHR1-1:1
rs2092163	chr22	40810231	40806304	41188085	lnc-MCHR1-1:1
rs28567076	chr22	40984598	40806304	41188085	lnc-MCHR1-1:1
rs3827381	chr22	40881402	40806304	41188085	lnc-MCHR1-1:1
rs3827382	chr22	40881403	40806304	41188085	lnc-MCHR1-1:1
rs55669535	chr22	41012819	40806304	41188085	lnc-MCHR1-1:1
rs55719110	chr22	41005749	40806304	41188085	lnc-MCHR1-1:1
rs55722862	chr22	40932041	40806304	41188085	lnc-MCHR1-1:1
rs55849114	chr22	40932003	40806304	41188085	lnc-MCHR1-1:1
rs55853923	chr22	40987113	40806304	41188085	lnc-MCHR1-1:1
rs55960299	chr22	40932066	40806304	41188085	lnc-MCHR1-1:1
rs55997921	chr22	41006612	40806304	41188085	lnc-MCHR1-1:1
rs56051217	chr22	41049402	40806304	41188085	lnc-MCHR1-1:1
rs56092708	chr22	40962808	40806304	41188085	lnc-MCHR1-1:1
rs56108505	chr22	41024650	40806304	41188085	lnc-MCHR1-1:1
rs56124626	chr22	40907951	40806304	41188085	lnc-MCHR1-1:1
rs59047419	chr22	41011279	40806304	41188085	lnc-MCHR1-1:1
rs5995867	chr22	40888136	40806304	41188085	lnc-MCHR1-1:1
rs6001931	chr22	40877514	40806304	41188085	lnc-MCHR1-1:1
rs6001932	chr22	40877635	40806304	41188085	lnc-MCHR1-1:1
rs6001939	chr22	40892794	40806304	41188085	lnc-MCHR1-1:1
rs6001942	chr22	40893866	40806304	41188085	lnc-MCHR1-1:1
rs6001949	chr22	40904486	40806304	41188085	lnc-MCHR1-1:1
rs6001950	chr22	40906635	40806304	41188085	lnc-MCHR1-1:1
rs6001974	chr22	40979164	40806304	41188085	lnc-MCHR1-1:1
rs6001979	chr22	40999766	40806304	41188085	lnc-MCHR1-1:1
rs6001980	chr22	41004384	40806304	41188085	lnc-MCHR1-1:1
rs6001981	chr22	41017425	40806304	41188085	lnc-MCHR1-1:1
rs6001982	chr22	41019948	40806304	41188085	lnc-MCHR1-1:1
rs6001983	chr22	41023304	40806304	41188085	lnc-MCHR1-1:1
rs6001984	chr22	41025380	40806304	41188085	lnc-MCHR1-1:1
rs718193	chr22	41024064	40806304	41188085	lnc-MCHR1-1:1
rs73167027	chr22	40808676	40806304	41188085	lnc-MCHR1-1:1
rs73167039	chr22	40833146	40806304	41188085	lnc-MCHR1-1:1
rs73167066	chr22	40873718	40806304	41188085	lnc-MCHR1-1:1
rs73167067	chr22	40875199	40806304	41188085	lnc-MCHR1-1:1
rs73167069	chr22	40878253	40806304	41188085	lnc-MCHR1-1:1
rs73167072	chr22	40879105	40806304	41188085	lnc-MCHR1-1:1
rs73167073	chr22	40879408	40806304	41188085	lnc-MCHR1-1:1
rs73167076	chr22	40879843	40806304	41188085	lnc-MCHR1-1:1
rs73167079	chr22	40883088	40806304	41188085	lnc-MCHR1-1:1
rs73167090	chr22	40888363	40806304	41188085	lnc-MCHR1-1:1
rs73167092	chr22	40892127	40806304	41188085	lnc-MCHR1-1:1
rs73167093	chr22	40893789	40806304	41188085	lnc-MCHR1-1:1
rs73167096	chr22	40894463	40806304	41188085	lnc-MCHR1-1:1
rs73167097	chr22	40895706	40806304	41188085	lnc-MCHR1-1:1
rs73167098	chr22	40895810	40806304	41188085	lnc-MCHR1-1:1
rs73169017	chr22	40936288	40806304	41188085	lnc-MCHR1-1:1
rs73169032	chr22	40956816	40806304	41188085	lnc-MCHR1-1:1
rs73169051	chr22	40979648	40806304	41188085	lnc-MCHR1-1:1
rs73169056	chr22	40986258	40806304	41188085	lnc-MCHR1-1:1
rs73169057	chr22	40990950	40806304	41188085	lnc-MCHR1-1:1
rs73169058	chr22	40992235	40806304	41188085	lnc-MCHR1-1:1
rs73169060	chr22	40994744	40806304	41188085	lnc-MCHR1-1:1
rs73169065	chr22	41009707	40806304	41188085	lnc-MCHR1-1:1
rs73169072	chr22	41016681	40806304	41188085	lnc-MCHR1-1:1
rs73169078	chr22	41019767	40806304	41188085	lnc-MCHR1-1:1
rs73169083	chr22	41022503	40806304	41188085	lnc-MCHR1-1:1
rs73169084	chr22	41022805	40806304	41188085	lnc-MCHR1-1:1
rs73169087	chr22	41024846	40806304	41188085	lnc-MCHR1-1:1
rs73169089	chr22	41024854	40806304	41188085	lnc-MCHR1-1:1
rs73169091	chr22	41026018	40806304	41188085	lnc-MCHR1-1:1
rs73169096	chr22	41027716	40806304	41188085	lnc-MCHR1-1:1
rs73169097	chr22	41027870	40806304	41188085	lnc-MCHR1-1:1
rs73169098	chr22	41031027	40806304	41188085	lnc-MCHR1-1:1
rs78694459	chr22	41027354	40806304	41188085	lnc-MCHR1-1:1
rs11669175	chr19	44289824	44288540	44290302	lnc-KCNN4-1:1
rs4802200	chr19	44289518	44288540	44290302	lnc-KCNN4-1:1
rs4803658	chr19	44290013	44288540	44290302	lnc-KCNN4-1:1
rs4803659	chr19	44290235	44288540	44290302	lnc-KCNN4-1:1
rs10087810	chr8	128352730	128302062	128433619	lnc-TMEM75-3:2
rs10087810	chr8	128352730	128302061	128433619	lnc-TMEM75-3:3
rs10087810	chr8	128352730	128302061	128494384	lnc-TMEM75-3:4
rs10087810	chr8	128352730	128351518	128404876	lnc-POU5F1B-1:1
rs10098985	chr8	128355019	128302061	128494384	lnc-TMEM75-3:4
rs10098985	chr8	128355019	128351518	128404876	lnc-POU5F1B-1:1
rs10098985	chr8	128355019	128302061	128433619	lnc-TMEM75-3:3
rs10098985	chr8	128355019	128302062	128433619	lnc-TMEM75-3:2
rs10447995	chr8	128357924	128302061	128433619	lnc-TMEM75-3:3
rs10447995	chr8	128357924	128302062	128433619	lnc-TMEM75-3:2
rs10447995	chr8	128357924	128351518	128404876	lnc-POU5F1B-1:1
rs10447995	chr8	128357924	128302061	128494384	lnc-TMEM75-3:4
rs10956360	chr8	128349970	128302061	128433619	lnc-TMEM75-3:3
rs10956360	chr8	128349970	128302061	128494384	lnc-TMEM75-3:4
rs10956360	chr8	128349970	128302062	128433619	lnc-TMEM75-3:2
rs10956361	chr8	128350106	128302061	128433619	lnc-TMEM75-3:3
rs10956361	chr8	128350106	128302061	128494384	lnc-TMEM75-3:4
rs10956361	chr8	128350106	128302062	128433619	lnc-TMEM75-3:2
rs10956362	chr8	128350386	128302061	128494384	lnc-TMEM75-3:4
rs10956362	chr8	128350386	128302062	128433619	lnc-TMEM75-3:2
rs10956362	chr8	128350386	128302061	128433619	lnc-TMEM75-3:3
rs10956363	chr8	128351773	128302061	128433619	lnc-TMEM75-3:3
rs10956363	chr8	128351773	128302062	128433619	lnc-TMEM75-3:2
rs10956363	chr8	128351773	128351518	128404876	lnc-POU5F1B-1:1
rs10956363	chr8	128351773	128302061	128494384	lnc-TMEM75-3:4
rs12541832	chr8	128353171	128351518	128404876	lnc-POU5F1B-1:1
rs12541832	chr8	128353171	128302061	128494384	lnc-TMEM75-3:4
rs12541832	chr8	128353171	128302062	128433619	lnc-TMEM75-3:2
rs12541832	chr8	128353171	128302061	128433619	lnc-TMEM75-3:3
rs13248140	chr8	128349888	128302062	128433619	lnc-TMEM75-3:2
rs13248140	chr8	128349888	128302061	128433619	lnc-TMEM75-3:3
rs13248140	chr8	128349888	128302061	128494384	lnc-TMEM75-3:4
rs13249993	chr8	128350515	128302061	128494384	lnc-TMEM75-3:4
rs13249993	chr8	128350515	128302062	128433619	lnc-TMEM75-3:2
rs13249993	chr8	128350515	128302061	128433619	lnc-TMEM75-3:3
rs13262406	chr8	128353739	128302061	128433619	lnc-TMEM75-3:3
rs13262406	chr8	128353739	128302062	128433619	lnc-TMEM75-3:2
rs13262406	chr8	128353739	128351518	128404876	lnc-POU5F1B-1:1
rs13262406	chr8	128353739	128302061	128494384	lnc-TMEM75-3:4
rs13270266	chr8	128354086	128351518	128404876	lnc-POU5F1B-1:1
rs13270266	chr8	128354086	128302061	128494384	lnc-TMEM75-3:4
rs13270266	chr8	128354086	128302062	128433619	lnc-TMEM75-3:2
rs13270266	chr8	128354086	128302061	128433619	lnc-TMEM75-3:3
rs13275275	chr8	128349727	128302061	128494384	lnc-TMEM75-3:4
rs13275275	chr8	128349727	128302062	128433619	lnc-TMEM75-3:2
rs13275275	chr8	128349727	128302061	128433619	lnc-TMEM75-3:3
rs1668875	chr8	128341103	128302061	128433619	lnc-TMEM75-3:3
rs1668875	chr8	128341103	128302061	128494384	lnc-TMEM75-3:4
rs1668875	chr8	128341103	128302062	128433619	lnc-TMEM75-3:2
rs17465052	chr8	128354080	128302061	128433619	lnc-TMEM75-3:3
rs17465052	chr8	128354080	128351518	128404876	lnc-POU5F1B-1:1
rs17465052	chr8	128354080	128302061	128494384	lnc-TMEM75-3:4
rs17465052	chr8	128354080	128302062	128433619	lnc-TMEM75-3:2
rs17465283	chr8	128355824	128351518	128404876	lnc-POU5F1B-1:1
rs17465283	chr8	128355824	128302062	128433619	lnc-TMEM75-3:2
rs17465283	chr8	128355824	128302061	128433619	lnc-TMEM75-3:3
rs17465283	chr8	128355824	128302061	128494384	lnc-TMEM75-3:4
rs28524866	chr8	128378191	128351518	128404876	lnc-POU5F1B-1:1
rs28524866	chr8	128378191	128302061	128494384	lnc-TMEM75-3:4
rs28524866	chr8	128378191	128302062	128433619	lnc-TMEM75-3:2
rs28524866	chr8	128378191	128302061	128433619	lnc-TMEM75-3:3
rs28759353	chr8	128352363	128302061	128494384	lnc-TMEM75-3:4
rs28759353	chr8	128352363	128302061	128433619	lnc-TMEM75-3:3
rs28759353	chr8	128352363	128302062	128433619	lnc-TMEM75-3:2
rs28759353	chr8	128352363	128351518	128404876	lnc-POU5F1B-1:1
rs389143	chr8	128344380	128302061	128494384	lnc-TMEM75-3:4
rs389143	chr8	128344380	128302061	128433619	lnc-TMEM75-3:3
rs389143	chr8	128344380	128302062	128433619	lnc-TMEM75-3:2
rs420101	chr8	128343879	128302061	128433619	lnc-TMEM75-3:3
rs420101	chr8	128343879	128302062	128433619	lnc-TMEM75-3:2
rs420101	chr8	128343879	128302061	128494384	lnc-TMEM75-3:4
rs436238	chr8	128345028	128302061	128494384	lnc-TMEM75-3:4
rs436238	chr8	128345028	128302062	128433619	lnc-TMEM75-3:2
rs436238	chr8	128345028	128302061	128433619	lnc-TMEM75-3:3
rs4871782	chr8	128352234	128302061	128494384	lnc-TMEM75-3:4
rs4871782	chr8	128352234	128302061	128433619	lnc-TMEM75-3:3
rs4871782	chr8	128352234	128302062	128433619	lnc-TMEM75-3:2
rs4871782	chr8	128352234	128351518	128404876	lnc-POU5F1B-1:1
rs56898669	chr8	128351442	128302061	128494384	lnc-TMEM75-3:4
rs56898669	chr8	128351442	128302061	128433619	lnc-TMEM75-3:3
rs56898669	chr8	128351442	128302062	128433619	lnc-TMEM75-3:2
rs581761	chr8	128345231	128302061	128433619	lnc-TMEM75-3:3
rs581761	chr8	128345231	128302062	128433619	lnc-TMEM75-3:2
rs581761	chr8	128345231	128302061	128494384	lnc-TMEM75-3:4
rs59351655	chr8	128351048	128302062	128433619	lnc-TMEM75-3:2
rs59351655	chr8	128351048	128302061	128494384	lnc-TMEM75-3:4
rs59351655	chr8	128351048	128302061	128433619	lnc-TMEM75-3:3
rs594868	chr8	128344602	128302061	128494384	lnc-TMEM75-3:4
rs594868	chr8	128344602	128302061	128433619	lnc-TMEM75-3:3
rs594868	chr8	128344602	128302062	128433619	lnc-TMEM75-3:2
rs594869	chr8	128344601	128302061	128433619	lnc-TMEM75-3:3
rs594869	chr8	128344601	128302061	128494384	lnc-TMEM75-3:4
rs594869	chr8	128344601	128302062	128433619	lnc-TMEM75-3:2
rs595821	chr8	128344410	128302061	128433619	lnc-TMEM75-3:3
rs595821	chr8	128344410	128302061	128494384	lnc-TMEM75-3:4
rs595821	chr8	128344410	128302062	128433619	lnc-TMEM75-3:2
rs61044379	chr8	128351954	128302062	128433619	lnc-TMEM75-3:2
rs61044379	chr8	128351954	128302061	128494384	lnc-TMEM75-3:4
rs61044379	chr8	128351954	128351518	128404876	lnc-POU5F1B-1:1
rs61044379	chr8	128351954	128302061	128433619	lnc-TMEM75-3:3
rs672888	chr8	128345463	128302061	128494384	lnc-TMEM75-3:4
rs672888	chr8	128345463	128302061	128433619	lnc-TMEM75-3:3
rs672888	chr8	128345463	128302062	128433619	lnc-TMEM75-3:2
rs673745	chr8	128345269	128302061	128494384	lnc-TMEM75-3:4
rs673745	chr8	128345269	128302061	128433619	lnc-TMEM75-3:3
rs673745	chr8	128345269	128302062	128433619	lnc-TMEM75-3:2
rs687279	chr8	128344624	128302061	128494384	lnc-TMEM75-3:4
rs687279	chr8	128344624	128302061	128433619	lnc-TMEM75-3:3
rs687279	chr8	128344624	128302062	128433619	lnc-TMEM75-3:2
rs687324	chr8	128344591	128302061	128494384	lnc-TMEM75-3:4
rs687324	chr8	128344591	128302062	128433619	lnc-TMEM75-3:2
rs687324	chr8	128344591	128302061	128433619	lnc-TMEM75-3:3
rs688201	chr8	128344402	128302061	128494384	lnc-TMEM75-3:4
rs688201	chr8	128344402	128302062	128433619	lnc-TMEM75-3:2
rs688201	chr8	128344402	128302061	128433619	lnc-TMEM75-3:3
rs688937	chr8	128345381	128302061	128494384	lnc-TMEM75-3:4
rs688937	chr8	128345381	128302061	128433619	lnc-TMEM75-3:3
rs688937	chr8	128345381	128302062	128433619	lnc-TMEM75-3:2
rs76102714	chr8	128355940	128351518	128404876	lnc-POU5F1B-1:1
rs76102714	chr8	128355940	128302062	128433619	lnc-TMEM75-3:2
rs76102714	chr8	128355940	128302061	128433619	lnc-TMEM75-3:3
rs76102714	chr8	128355940	128302061	128494384	lnc-TMEM75-3:4
rs7826557	chr8	128345731	128302061	128494384	lnc-TMEM75-3:4
rs7826557	chr8	128345731	128302062	128433619	lnc-TMEM75-3:2
rs7826557	chr8	128345731	128302061	128433619	lnc-TMEM75-3:3
rs7838714	chr8	128343948	128302061	128494384	lnc-TMEM75-3:4
rs7838714	chr8	128343948	128302061	128433619	lnc-TMEM75-3:3
rs7838714	chr8	128343948	128302062	128433619	lnc-TMEM75-3:2
rs62485509	chr7	144048902	144040334	144052494	lnc-ARHGEF35-1:1
rs62485509	chr7	144048902	144008683	144052796	lnc-ARHGEF35-1:6
rs62485509	chr7	144048902	143997563	144052613	lnc-ARHGEF35-1:9
rs62485509	chr7	144048902	143951188	144052461	lnc-ARHGEF35-1:11
rs62485509	chr7	144048902	143949388	144052693	lnc-ARHGEF35-1:12
rs62485509	chr7	144048902	144033860	144052774	lnc-ARHGEF35-1:3
rs62485509	chr7	144048902	143948417	144052622	lnc-ARHGEF35-1:16
rs62485509	chr7	144048902	144040263	144052312	lnc-ARHGEF35-1:2
rs62485509	chr7	144048902	143948500	144052800	lnc-ARHGEF35-1:14
rs62485509	chr7	144048902	144004240	144052778	lnc-ARHGEF35-1:7
rs62485509	chr7	144048902	144015765	144052244	lnc-ARHGEF35-1:4
rs62485509	chr7	144048902	143948356	144052231	lnc-ARHGEF35-1:17
rs62485509	chr7	144048902	144008975	144053274	lnc-ARHGEF35-1:5
rs148481859	chr7	144049621	144040334	144052494	lnc-ARHGEF35-1:1
rs148481859	chr7	144049621	144008683	144052796	lnc-ARHGEF35-1:6
rs148481859	chr7	144049621	143997563	144052613	lnc-ARHGEF35-1:9
rs148481859	chr7	144049621	143951188	144052461	lnc-ARHGEF35-1:11
rs148481859	chr7	144049621	143949388	144052693	lnc-ARHGEF35-1:12
rs148481859	chr7	144049621	144033860	144052774	lnc-ARHGEF35-1:3
rs148481859	chr7	144049621	143948417	144052622	lnc-ARHGEF35-1:16
rs148481859	chr7	144049621	144040263	144052312	lnc-ARHGEF35-1:2
rs148481859	chr7	144049621	143948500	144052800	lnc-ARHGEF35-1:14
rs148481859	chr7	144049621	144004240	144052778	lnc-ARHGEF35-1:7
rs148481859	chr7	144049621	144015765	144052244	lnc-ARHGEF35-1:4
rs148481859	chr7	144049621	143948356	144052231	lnc-ARHGEF35-1:17
rs148481859	chr7	144049621	144008975	144053274	lnc-ARHGEF35-1:5
rs17726078	chr2	172974566	172967733	172974710	lnc-DLX1-1:1
