# Supplementary material for: Comprehensive Functional Annotation of Seventy-One Breast Cancer Risk Loci
Source: PLoS One. 2013 May 22;8(5):e63925. doi: 10.1371/journal.pone.0063925 (PMC3661550; doi:10.1371/journal.pone.0063925)
Supplement: Table S16 — FAIRE-seq statistics. (XLS) [file pone.0063925.s022.xls]

## Sheet: Venn (2)
Table S16. FAIRE-seq statistics
Sample name	# raw aligned reads	# uniquely aligned reads before quality filter	# uniquely aligned reads after quality filter(q30)	Total # peaks	# peaks (p<10-9)
HMEC 1 FAIRE	101399237	61956330	54623689	60780	19748
HMEC 2 FAIRE	17628216	9891691	8712206	57612	15133
HMEC merged FAIRE	119027453	71444752	63108273	57489	18907
HMEC input	94603209	86090594	74849230
